# Supplementary material
Source: Royal Society of Chemistry journal article supplement (doi:10.1039/d6nj00299d)
Supplement: d6nj00299d1.pdf [file d6nj00299d1.pdf]

## Electronic supplementary materials

### Sustainable Ruthenium-Catalyzed C–H Alkylation of 2-(Hetero)aryl Benzimidazoles with Maleimides

Konstantin E. Shepelenko\*, Irina G. Gnatiuk, Uliana A. Kolotova, Mikhail E. Minyaev, Victor M. Chernyshev\*

## Supplementary Data

### Table of contents

|                                                                           |  |
|---------------------------------------------------------------------------|--|
| S1. General information and additional experimental data.....             |  |
| S2. Synthetic procedures and characterization of isolated compounds ..... |  |
| S3. X-ray crystallographic data and refinement details. ....              |  |
| S4. <sup>1</sup> H and <sup>13</sup> C NMR spectra.....                   |  |

# S1. General information and additional experimental data

## General Information

$^1\text{H}$  and  $^{13}\text{C}$  NMR spectra were recorded on a Bruker Fourier300 (300 and 75 MHz, respectively) spectrometer. Chemical shifts are given relative to the residual signals of protons of chloroform-*d* (7.26 for  $^1\text{H}$  NMR) or carbon signals in chloroform-*d* (77.16 ppm for  $^{13}\text{C}$  NMR).

High-resolution mass spectra (HRMS) were recorded on a Bruker maXis Q-TOF instrument (Bruker Daltonik GmbH, Bremen, Germany) equipped with an electrospray ionization (ESI) ion source. The measurements were performed in a positive (+) MS ion mode (HV Capillary: 4500 V; Spray Shield: -500 V) with a scan range of  $m/z$  50 – 1500. External calibration of the mass spectrometer was achieved using a low-concentration tuning mix solution (Agilent Technologies). Direct syringe injection was applied for the analysed solutions at a flow rate  $3\ \mu\text{L}\ \text{min}^{-1}$ . Nitrogen was used as nebulizer gas (0.4 bar) and dry gas ( $4.0\ \text{L}\ \text{min}^{-1}$ ). The dry temperature was established at  $250\ ^\circ\text{C}$ . All the spectra were recorded with 1 Hz frequency and processed using the Bruker Data Analysis 4.0 software package.

## Materials

1-methyl-2-(thiophen-2-yl)-1*H*-benzo[*d*]imidazole (**1a**)<sup>S1</sup>, 2-(furan-2-yl)-1-methyl-1*H*-benzo[*d*]imidazole (**1b**)<sup>S2</sup>, 1-methyl-2-(5-methylfuran-2-yl)-1*H*-benzo[*d*]imidazole (**1c**)<sup>S3</sup>, 1-methyl-2-(*p*-tolyl)-1*H*-benzo[*d*]imidazole (**1d**)<sup>S4</sup>, 2-(4-methoxyphenyl)-1-methyl-1*H*-benzo[*d*]imidazole (**1e**)<sup>S5</sup>, 2-(3,4-dimethoxyphenyl)-1-methyl-1*H*-benzo[*d*]imidazole (**1f**)<sup>S6</sup>.

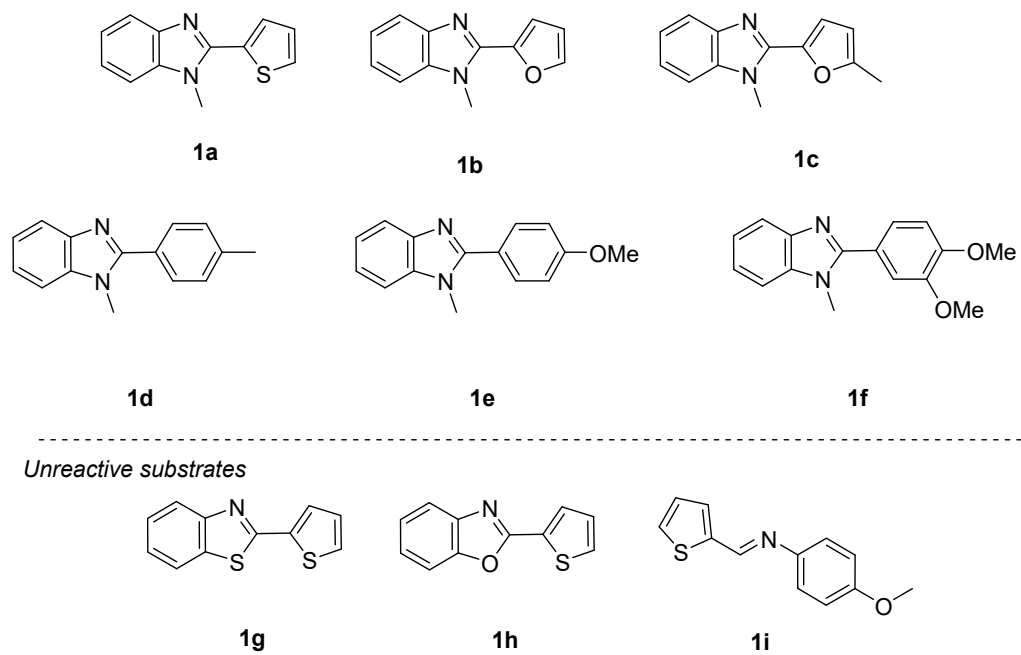

**Figure S1.** Substrates used in the study

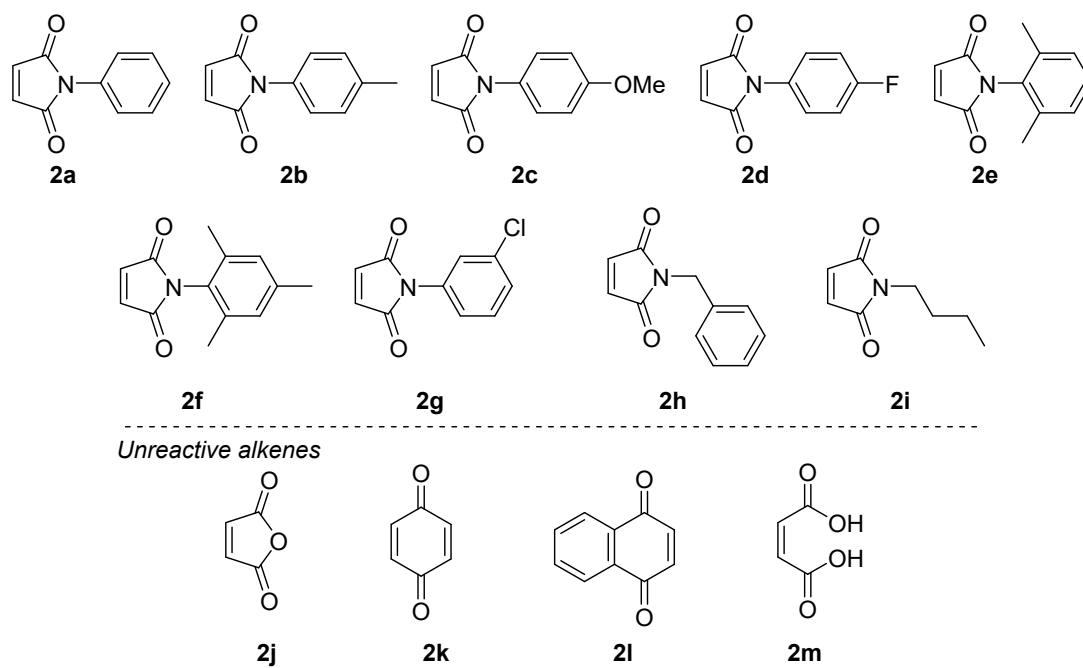

**Figure S2.** Maleimides used in the study.

## S2. Extended experimental data

Table S1. Formation of side product **5** during reaction

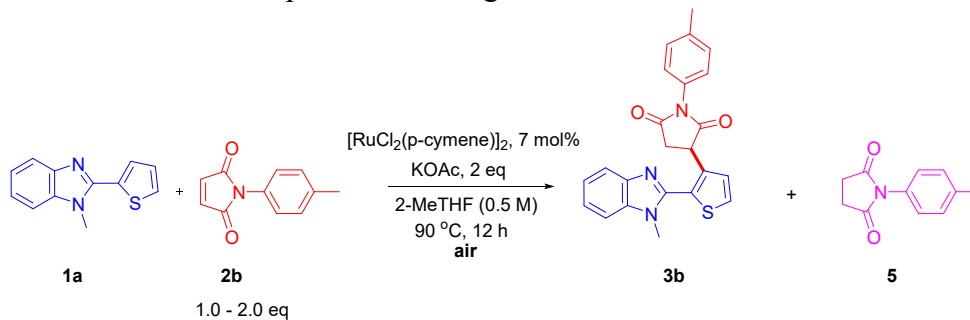

| Entry | Amount of maleimide | Yield <b>3b</b> , <sup>[b]</sup> % | Yield of <b>5</b> , <sup>[b]</sup> % |
|-------|---------------------|------------------------------------|--------------------------------------|
| 1     | <b>2b</b> , 2.0 eq  | 80                                 | 20                                   |
| 2     | <b>2b</b> , 1.6 eq  | 80                                 | 19                                   |
| 3     | <b>2b</b> , 1.0 eq  | 59                                 | 5                                    |
| 4     | <b>2b</b> , 1.4 eq  | 79                                 | 9                                    |

<sup>[a]</sup> Reaction conditions: **1a** (0.25 mmol), **2b** (0.5 mmol), KOAc (0.5 mmol), MeTHF (0.5 mL), [Ru] (7 mol%) <sup>[b]</sup> The yields determined by GC-MS

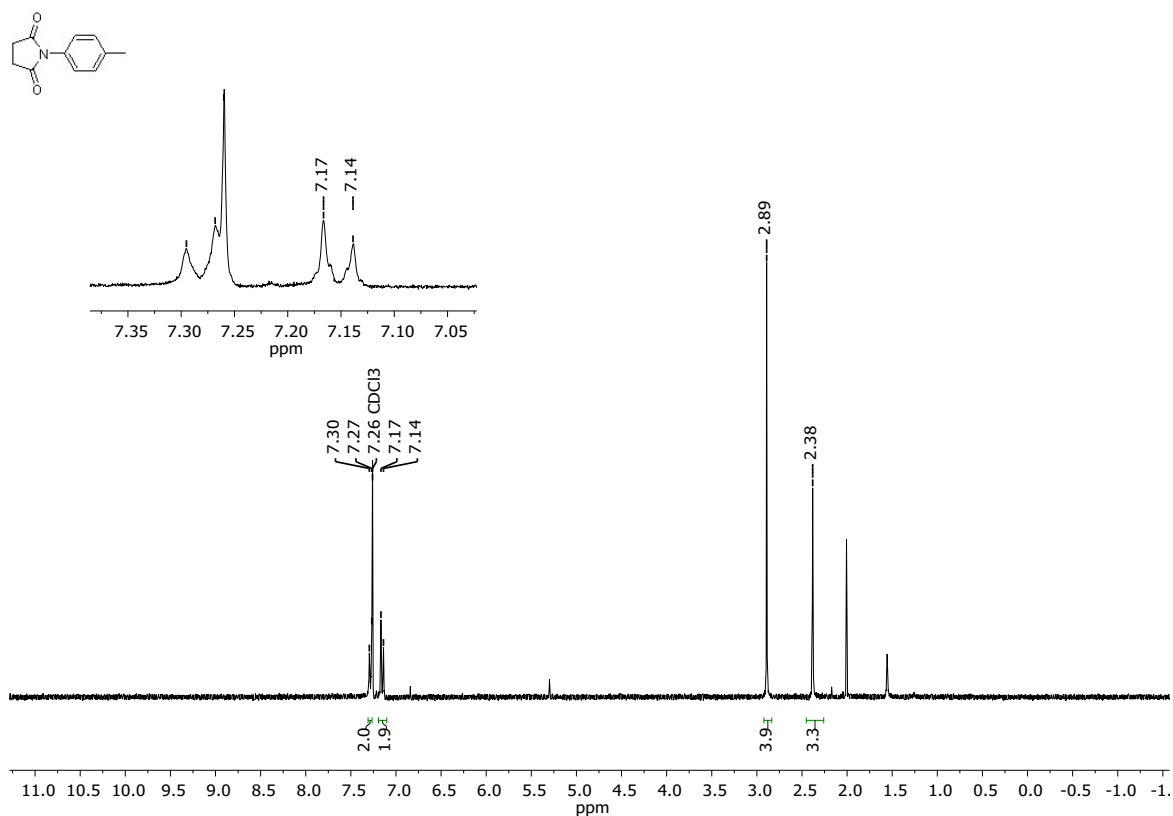

Table S2. Robustness screening

| Entry | Competing reagent | Yield <b>3b</b> , <sup>[b]</sup> % | Entry | Competing reagent | Yield <b>3b</b> , <sup>[b]</sup> % |
|-------|-------------------|------------------------------------|-------|-------------------|------------------------------------|
| 1     |                   | 75                                 | 6     |                   | 29                                 |
| 2     |                   | 77                                 | 7     |                   | trace                              |
| 3     |                   | 65                                 | 8     |                   | 81                                 |
| 4     |                   | 79                                 | 9     |                   | trace                              |
| 5     |                   | 14                                 | 10    |                   | 51                                 |

<sup>a]</sup> Reaction conditions: **1a** (0.25 mmol), **2b** (0.5 mmol), KOAc (0.5 mmol), MeTHF (0.5 mL), [Ru] (7 mol%), additive (0.25) <sup>[b]</sup> The yields determined by GC-MS

## S2. Mechanistic study

### 2.1 Deuteroexchange

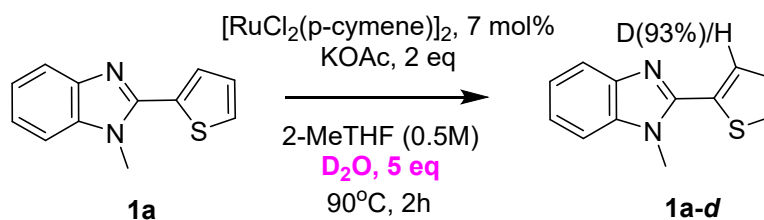

A mixture of compound **1a** (53 mg, 0.25 mmol), KOAc (0. g, 0.5 mmol),  $[\text{RuCl}_2(\text{p-cymene})]_2$  (0.008 g, 0.00175 mmol, 7 mol%), 2-MeTHF (0.5 mL) and  $\text{D}_2\text{O}$  (0.06 mL) was stirred under an argon atmosphere at 90 °C for 2 h. Then, the mixture was cooled to room temperature, diluted with 2 ml of DCM and filtered through a short pad of Celite. The filtrate obtained was evaporated in vacuo and purified by column chromatography on silica gel (DCM-EtOAc (10:1) mixture as the eluent).

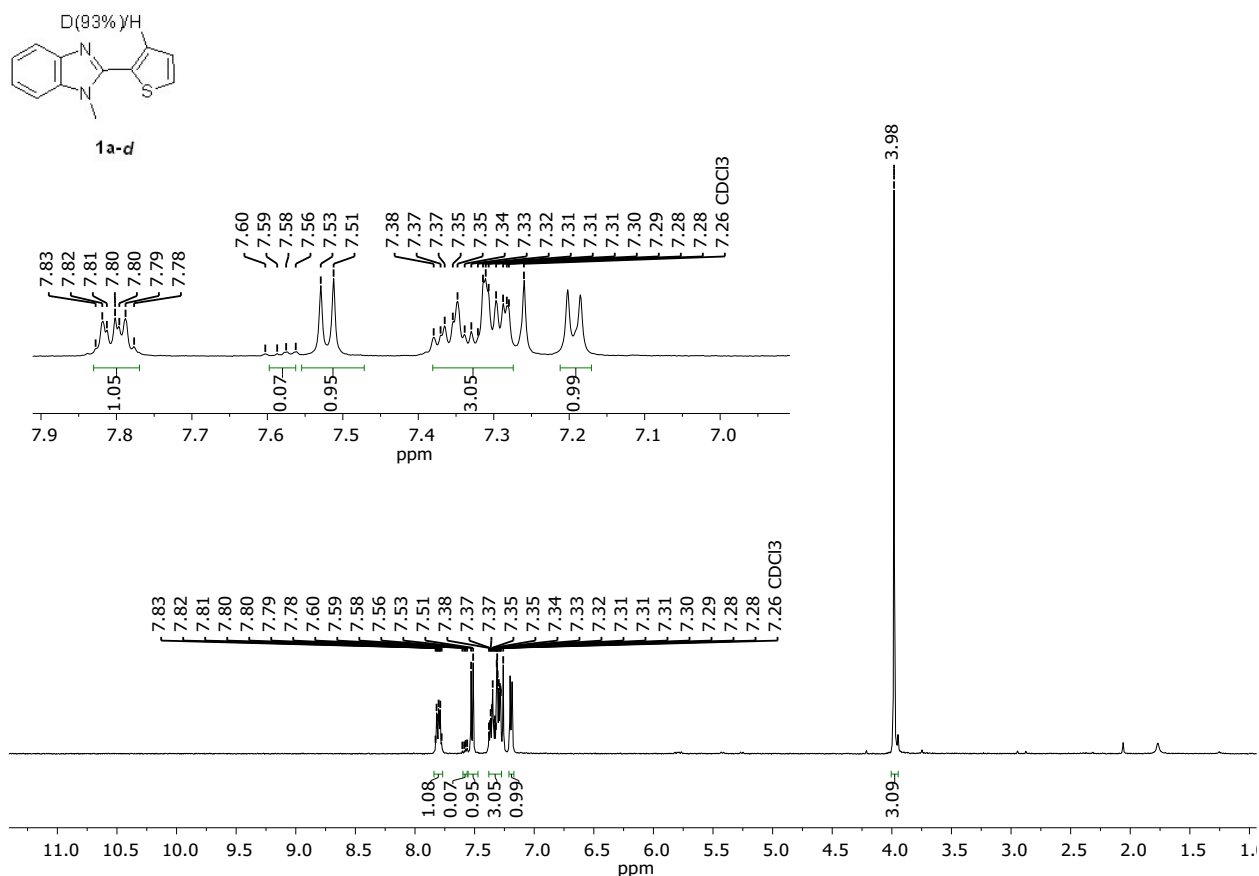

## 2.2. Determination of KIE effect

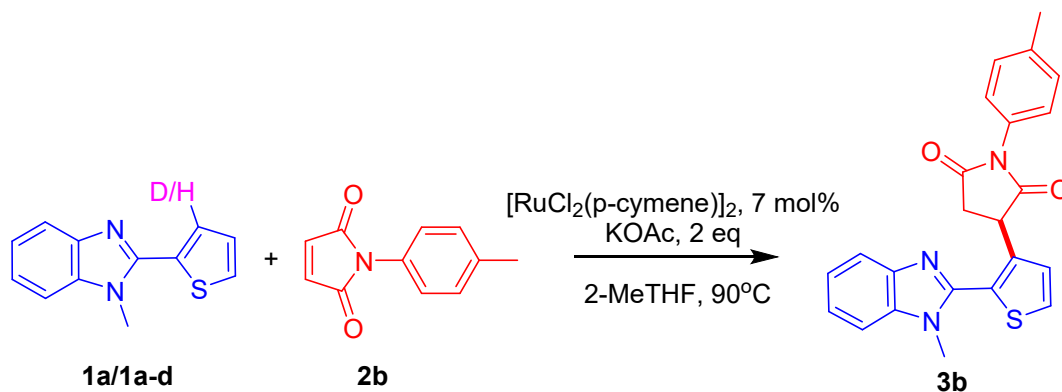

In a screw-capped with a Teflon seal 4 mL high-pressure glass tube equipped with a magnetic stir bar a mixture of compound **1a** or **1a-d** (0.054 g, 0.25 mmol), the maleimide **2b** (0.094 g, 0.5 mmol), KOAc (0.049 g, 0.5 mmol), and  $[\text{RuCl}_2(p\text{-cymene})]_2$  (0.011 g, 0.0175 mmol, 7 mol %) in 2-methyltetrahydrofuran (0.5 mL) was heated at  $90^\circ\text{C}$  for 1, 2, 4 and 8 h while stirring. After being cooled to room temperature, the mixture was filtered through a short pad of Celite. The filtrate was concentrated under reduced pressure, and the crude mixture was analyzed by NMR using mesitylene as an internal standard.

**Table S3** Determination of the reaction kinetic isotope effect (KIE)

| T, h               | Yield of <b>3b</b> with <b>1a</b> , % | Yield of <b>3b</b> with <b>1a-d</b> , % | KIE         |
|--------------------|---------------------------------------|-----------------------------------------|-------------|
| <b>1</b>           | 5                                     | 5                                       | <b>1.00</b> |
| <b>2</b>           | 8                                     | 8                                       | <b>1.00</b> |
| <b>4</b>           | 21                                    | 20                                      | <b>1.05</b> |
| <b>8</b>           | 58                                    | 56                                      | <b>1.04</b> |
| <b>Average KIE</b> | <b>1.02</b>                           |                                         |             |

## S2. Synthetic procedures and characterization of isolated compounds

**General procedure for the synthesis of compounds 3a-s.** The reaction was performed under air atmosphere in a screw-capped with a Teflon seal 4 mL high-pressure glass tube equipped with a magnetic stir bar. A mixture of compound **1a-e** (0.25 mmol), the corresponding maleimide **2a-i** (0.5 mmol), KOAc (0.049 g, 0.5 mmol), and  $[\text{RuCl}_2(p\text{-cymene})]_2$  (0.011 g, 0.0175 mmol, 7 mol %) in 2-methyltetrahydrofuran (0.5 mL) was heated at 90 °C for 12 h while stirring. After being cooled to room temperature, the mixture was filtered through a short pad of Celite. The filtrate was concentrated under reduced pressure, and the crude product was purified by column chromatography on silica gel using a hexane/EtOAc (1:1) mixture as the eluent.

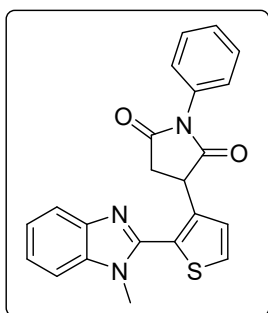

**3-(2-(1-methyl-1H-benzo[d]imidazol-2-yl)thiophen-3-yl)-1-phenylpyrrolidine-2,5-dione (3a).** Yield 0.074 g (76%), white solid.  $^1\text{H}$  NMR ( $\text{CDCl}_3$ , 300 MHz): 3.26 – 3.46 (m, 2H), 3.89 (s, 2H), 4.61 (dd,  $J = 9.0$ , 6.8 Hz, 1H), 6.93 – 7.01 (m, 2H), 7.15 (d,  $J = 5.2$  Hz, 1H), 7.22 – 7.41 (m, 6H), 7.57 (d,  $J = 5.1$  Hz, 1H), 7.63 – 7.73 (m, 1H).  $^{13}\text{C}$  NMR ( $\text{CDCl}_3$ , 75 MHz):  $\delta$  31.6, 37.6, 41.6, 109.9, 120.2, 122.8, 123.5, 126.5, 127.5, 128.1, 128.5, 128.9, 129.1, 132.0, 136.2, 139.3, 142.9, 146.7, 175.3, 176.5. ESI-MS(TOF)  $m/z$ :  $[\text{M}+\text{H}]^+$  Calcd for  $[\text{C}_{22}\text{H}_{18}\text{N}_3\text{O}_2\text{S}]^+$   $m/z$ : 388.1114, found 388.1115.

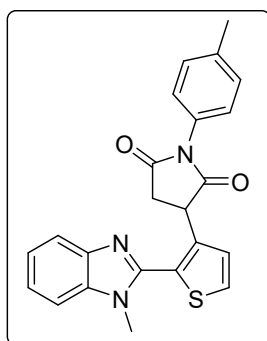

**3-(2-(1-methyl-1H-benzo[d]imidazol-2-yl)thiophen-3-yl)-1-(p-tolyl)pyrrolidine-2,5-dione (3b).** Yield 0.074 g (74%), white powder.  $^1\text{H}$  NMR ( $\text{CDCl}_3$ , 300 MHz): 2.32 (s, 3H), 3.19 – 3.47 (m, 2H), 3.89 (s, 3H), 4.60 (dd,  $J = 9.1$ , 6.8 Hz, 1H), 6.84 (dd,  $J = 8.4$ , 1.8 Hz, 2H), 7.06 – 7.20 (m, 3H), 7.24 – 7.41 (m, 3H), 7.57 (d,  $J = 5.2$  Hz, 1H), 7.68 – 7.73 (m, 1H).  $^{13}\text{C}$  NMR ( $\text{CDCl}_3$ , 75 MHz):  $\delta$  21.3, 31.6, 37.7, 41.6, 109.9, 120.3, 122.9, 123.5, 126.4, 127.6, 128.1, 128.8, 129.3, 129.8, 136.3, 138.7, 139.4, 142.9, 146.7, 175.4, 176.7. ESI-MS(TOF)  $m/z$ :  $[\text{M}+\text{H}]^+$  Calcd for  $[\text{C}_{23}\text{H}_{22}\text{N}_3\text{O}_2\text{S}]^+$   $m/z$ : 402.1271, found 402.1277.

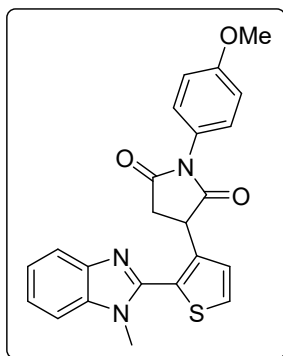

**1-(4-methoxyphenyl)-3-(2-(1-methyl-1H-benzo[d]imidazol-2-yl)thiophen-3-yl)pyrrolidine-2,5-dione (3c).** Yield 0.078 g (75%), white solid.  $^1\text{H}$  NMR ( $\text{CDCl}_3$ , 300 MHz): 3.35 (dd,  $J = 7.9, 5.3$  Hz, 2H), 3.77 (s, 3H), 3.89 (s, 2H), 4.59 (dd,  $J = 9.0, 6.8$  Hz, 1H), 6.76 – 6.93 (m, 4H), 7.14 (d,  $J = 5.1$  Hz, 1H), 7.27 – 7.42 (m, 3H), 7.57 (d,  $J = 5.1$  Hz, 1H), 7.69 (d,  $J = 7.8$  Hz, 1H).  $^{13}\text{C}$  NMR ( $\text{CDCl}_3$ , 75 MHz):  $\delta$ , 31.7, 37.6, 41.6, 55.6, 109.9, 114.4, 120.3, 122.8, 123.5, 124.6, 125.6, 127.5, 127.8, 128.1, 128.8, 136.2, 139.4, 142.9, 175.5, 176.8. ESI-MS(TOF)  $m/z$ :  $[\text{M}+\text{H}]^+$  Calcd for  $[\text{C}_{23}\text{H}_{20}\text{N}_3\text{O}_3\text{S}]^+$   $m/z$ : 418.1220, found 418.1225.

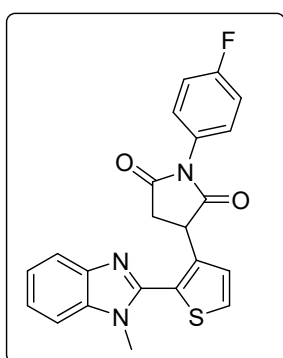

**1-(4-fluorophenyl)-3-(2-(1-methyl-1H-benzo[d]imidazol-2-yl)thiophen-3-yl)pyrrolidine-2,5-dione (3d).** Yield 0.050 g (49%), white solid.  $^1\text{H}$  NMR ( $\text{CDCl}_3$ , 300 MHz): 3.38 (d,  $J = 7.9$  Hz, 2H), 3.91 (s, 3H), 4.60 (t,  $J = 7.9$  Hz, 1H), 6.87 – 7.05 (m, 4H), 7.15 (d,  $J = 5.2$  Hz, 1H), 7.23 – 7.43 (m, 3H), 7.58 (d,  $J = 5.1$  Hz, 1H), 7.64 (d,  $J = 7.9$  Hz, 1H).  $^{13}\text{C}$  NMR ( $\text{CDCl}_3$ , 75 MHz):  $\delta$ , 31.7, 37.6, 41.7, 109.9, 115.9, 116.2, 120.2, 122.9, 123.6, 128.0, 128.3, 128.4, 129.4, 139.2, 142.8, 168.5, 171.9, 175.2, 176.5. ESI-MS(TOF)  $m/z$ :  $[\text{M}+\text{H}]^+$  Calcd for  $[\text{C}_{22}\text{H}_{17}\text{FN}_3\text{O}_3\text{S}]^+$   $m/z$ : 406.1020, found 406.1026.

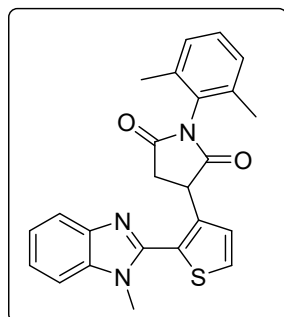

**1-(2,6-dimethylphenyl)-3-(2-(1-methyl-1H-benzo[d]imidazol-2-yl)thiophen-3-yl)pyrrolidine-2,5-dione (3e).** Yield 0.067 g (65%), yellowish oil.  $^1\text{H}$  NMR ( $\text{CDCl}_3$ , 300 MHz): 2.10 (s, 3H), 2.12 (s, 3H), 3.19 (ddd,  $J = 18.8, 5.8, 1.6$  Hz, 1H), 3.59 (ddd,  $J = 18.8, 9.8, 1.6$  Hz, 1H), 3.93 (s, 3H), 4.81 (dd,  $J = 9.7, 5.8$  Hz, 1H), 7.09 – 7.26 (m, 4H), 7.34 – 7.50 (m, 3H), 7.65 (d,  $J = 5.2$  Hz, 1H), 7.85 (dd,  $J = 7.3, 1.8$  Hz, 1H).  $^{13}\text{C}$  NMR ( $\text{CDCl}_3$ , 75 MHz):  $\delta$  18.0, 31.6, 37.8, 41.3, 110.0, 120.2, 122.9, 123.6, 126.2, 126.2, 128.7, 128.8, 129.0, 129.7, 135.7, 136.3, 139.3, 143.0, 146.6, 175.0, 176.2. ESI-MS(TOF)  $m/z$ :  $[\text{M}+\text{H}]^+$  Calcd for  $[\text{C}_{24}\text{H}_{22}\text{N}_3\text{O}_2\text{S}]^+$   $m/z$ : 416.1427, found 416.1433.

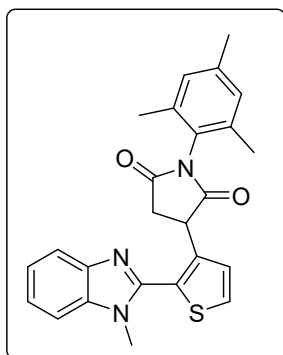

**1-mesityl-3-(2-(1-methyl-1H-benzo[d]imidazol-2-yl)thiophen-3-yl)pyrrolidine-2,5-dione (3f).** Yield 0.063 g (59%), yellowish oil.  $^1\text{H}$  NMR ( $\text{CDCl}_3$ , 300 MHz): 1.91 – 2.09 (m, 6H), 2.28 (s, 3H), 3.15 (dd,  $J =$

18.7, 5.7 Hz, 1H), 3.55 (dd,  $J = 18.7, 9.7$  Hz, 1H), 3.89 (s, 3H), 4.75 (dd,  $J = 9.7, 5.6$  Hz, 1H), 6.94 (s, 2H), 7.12 (d,  $J = 5.2$  Hz, 1H), 7.29 – 7.47 (m, 3H), 7.61 (d,  $J = 5.2$  Hz, 1H), 7.82 (dd,  $J = 6.2, 2.9$  Hz, 1H).  $^{13}\text{C}$  NMR ( $\text{CDCl}_3$ , 75 MHz):  $\delta$  17.90, 17.95, 21.2, 31.6, 37.7, 41.2, 110.0, 120.2, 122.9, 123.6, 126.2, 127.6, 128.5, 129.0, 129.5, 129.6, 135.3, 136.2, 139.4, 139.6, 143.0, 146.6, 175.2, 176.3. ESI-MS(TOF)  $m/z$ :  $[\text{M}+\text{H}]^+$  Calcd for  $[\text{C}_{25}\text{H}_{24}\text{N}_3\text{O}_2\text{S}]^+$   $m/z$ : 430.1584, found 430.1589.

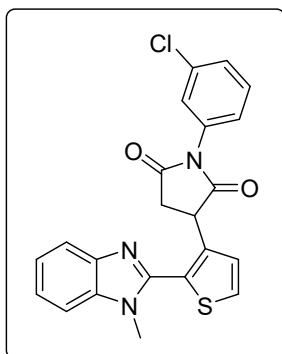

**1-(3-chlorophenyl)-3-(2-(1-methyl-1H-benzo[d]imidazol-2-yl)thiophen-3-yl)pyrrolidine-2,5-dione (3g).** Yield 0.073 g (69%), yellowish oil.  $^1\text{H}$  NMR ( $\text{CDCl}_3$ , 300 MHz): 3.38 (dd,  $J = 8.0, 1.9$  Hz, 2H), 3.90 (s, 3H), 4.59 (dd,  $J = 8.8, 7.2$  Hz, 1H), 6.87 (d,  $J = 5.9$  Hz, 1H), 6.95 (d,  $J = 2.2$  Hz, 1H), 7.15 (d,  $J = 5.1$  Hz, 1H), 7.20 – 7.41 (m, 4H), 7.57 (d,  $J = 5.1$  Hz, 1H), 7.60 – 7.68 (m, 1H).  $^{13}\text{C}$  NMR ( $\text{CDCl}_3$ , 75 MHz):  $\delta$  31.7, 37.6, 41.8, 109.9, 120.2, 123.0, 123.7, 124.7, 126.8, 127.4, 128.0, 128.7, 129.4, 129.9, 133.1, 134.6, 136.2, 139.0, 142.8, 146.7, 174.9, 176.2. ESI-MS(TOF)  $m/z$ :  $[\text{M}+\text{H}]^+$  Calcd for  $[\text{C}_{22}\text{H}_{17}\text{ClN}_3\text{O}_2\text{S}]^+$   $m/z$ : 422.0725, found 422.0729.

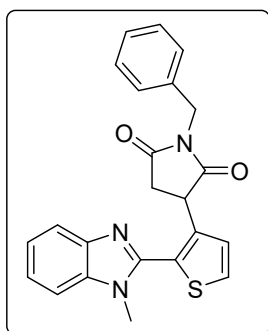

**1-benzyl-3-(2-(1-methyl-1H-benzo[d]imidazol-2-yl)thiophen-3-yl)pyrrolidine-2,5-dione (3h).** Yield 0.075 g (75%), yellowish oil.  $^1\text{H}$  NMR ( $\text{CDCl}_3$ , 300 MHz): 2.98 (dd,  $J = 18.3, 5.5$  Hz, 1H), 3.27 (dd,  $J = 18.9, 9.5$  Hz, 1H), 3.90 (d,  $J = 1.5$  Hz, 3H), 4.40 (d,  $J = 14.3$  Hz, 1H), 4.44 – 4.54 (m, 1H), 4.59 (d,  $J = 14.1$  Hz, 1H), 6.94 (d,  $J = 5.2$  Hz, 1H), 7.25 – 7.43 (m, 8H), 7.52 (d,  $J = 5.2$  Hz, 1H), 7.63 – 7.84 (m, 1H).  $^{13}\text{C}$  NMR ( $\text{CDCl}_3$ , 75 MHz):  $\delta$  31.6, 37.6, 41.1, 42.7, 109.9, 120.1, 122.8, 123.5, 127.6, 128.0, 128.4, 128.7, 128.8, 135.9, 136.2, 139.7, 142.8, 146.6, 175.9, 177.3. ESI-MS(TOF)  $m/z$ :  $[\text{M}+\text{H}]^+$  Calcd for  $[\text{C}_{23}\text{H}_{20}\text{N}_3\text{O}_2\text{S}]^+$   $m/z$ : 402.1271, found 402.1285.

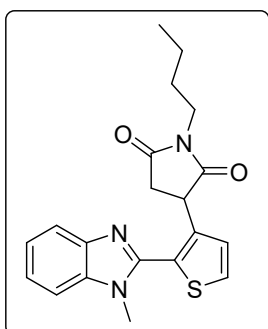

**1-butyl-3-(2-(1-methyl-1H-benzo[d]imidazol-2-yl)thiophen-3-yl)pyrrolidine-2,5-dione (3i).** Yield 0.072 g (79%), colorless oil.  $^1\text{H}$  NMR ( $\text{CDCl}_3$ , 300 MHz): 0.84 (t,  $J = 7.2$  Hz, 3H), 1.12 – 1.43 (m, 4H), 3.02 (dd,  $J = 18.2, 5.6$  Hz, 1H), 3.16 – 3.47 (m, 3H), 3.89 (s, 3H), 4.43 (dd,  $J = 9.5, 5.6$  Hz, 1H), 7.01 (d,  $J = 5.2$  Hz, 1H), 7.22 – 7.41 (m, 3H), 7.54 (d,  $J = 5.1$  Hz, 1H), 7.67 – 7.76 (m, 1H).  $^{13}\text{C}$  NMR ( $\text{CDCl}_3$ , 75 MHz):  $\delta$  13.7, 20.1, 29.7, 31.5, 37.6, 38.9, 41.0, 109.8, 120.1, 122.8, 123.5, 127.7, 128.3, 136.2,

139.7, 142.8, 146.6, 158.3, 176.3, 177.6. ESI-MS(TOF)  $m/z$ :  $[M+H]^+$  Calcd for  $[C_{20}H_{22}N_3O_2S]^+$   $m/z$ : 368.1427, found 368.1420.

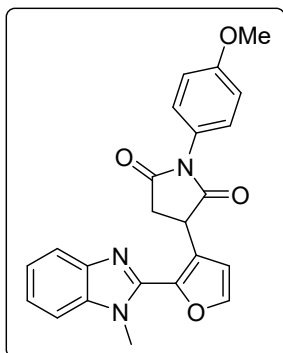

**1-(4-methoxyphenyl)-3-(2-(1-methyl-1H-benzo[d]imidazol-2-yl)furan-3-yl)pyrrolidine-2,5-dione (3j).** Yield 0.049 g (49%), white solid.  $^1H$  NMR ( $CDCl_3$ , 300 MHz): 3.26 (dd,  $J = 17.9, 6.4$  Hz, 1H), 3.45 (dd,  $J = 18.0, 9.6$  Hz, 1H), 3.87 (s, 3H), 4.15 (s, 3H), 4.72 (dd,  $J = 9.6, 6.3$  Hz, 1H), 6.68 (d,  $J = 1.8$  Hz, 1H), 7.01 (d,  $J = 8.7$  Hz, 2H), 7.23 – 7.47 (m, 5H), 7.59 (d,  $J = 7.9$  Hz, 1H), 7.66 (d,  $J = 1.8$  Hz, 1H).  $^{13}C$  NMR ( $CDCl_3$ , 75 MHz):  $\delta$  31.8, 36.6, 38.9, 55.6, 109.5, 114.4, 114.5, 120.1, 122.7, 123.2, 123.8, 125.2, 128.0, 136.0, 142.9, 143.1, 143.7, 159.5, 176.1, 176.9. ESI-MS(TOF)  $m/z$ :  $[M+H]^+$  Calcd for  $[C_{23}H_{20}N_3O_4]^+$   $m/z$ : 402.1448, found 402.1455.

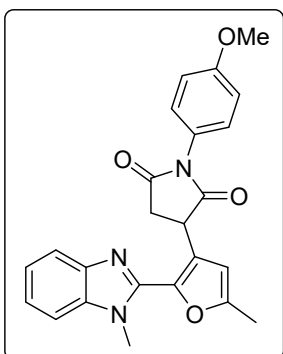

**1-(4-methoxyphenyl)-3-(5-methyl-2-(1-methyl-1H-benzo[d]imidazol-2-yl)furan-3-yl)pyrrolidine-2,5-dione (3k).** Yield 0.058 g (56%), white solid.  $^1H$  NMR ( $CDCl_3$ , 300 MHz): 2.45 (d,  $J = 1.0$  Hz, 3H), 3.18 (dd,  $J = 17.9, 6.3$  Hz, 1H), 3.38 (dd,  $J = 18.0, 9.6$  Hz, 1H), 3.83 (s, 3H), 4.09 (s, 3H), 4.64 (dd,  $J = 9.6, 6.3$  Hz, 1H), 6.24 (d,  $J = 1.1$  Hz, 1H), 6.90 – 7.02 (m, 2H), 7.22 (d,  $J = 1.3$  Hz, 1H), 7.22 – 7.34 (m, 3H), 7.37 (d,  $J = 7.8$  Hz, 1H), 7.53 (d,  $J = 7.8$  Hz, 1H).  $^{13}C$  NMR ( $CDCl_3$ , 75 MHz):  $\delta$  31.8, 36.6, 38.9, 55.6, 109.5, 114.4, 114.5, 120.1, 122.7, 123.2, 123.8, 125.2, 128.0, 136.0, 142.9, 143.1, 143.7, 159.5, 176.1, 176.9. ESI-MS(TOF)  $m/z$ :  $[M+H]^+$  Calcd for  $[C_{24}H_{22}N_3O_4]^+$   $m/z$ : 416.1605, found 416.1600.

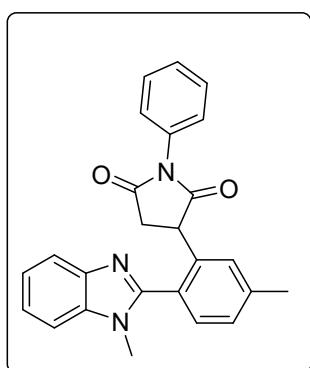

**3-(5-methyl-2-(1-methyl-1H-benzo[d]imidazol-2-yl)phenyl)-1-phenylpyrrolidine-2,5-dione (3l).** Yield 0.085 g (86%), white solid.  $^1H$  NMR ( $CDCl_3$ , 300 MHz): 3.35 (dd,  $J = 18.2, 9.8$  Hz, 1H), 3.57 – 3.71 (m, 4H), 4.34 (dd,  $J = 9.8, 6.3$  Hz, 1H), 6.52 – 6.69 (m, 2H), 7.18 – 7.42 (m, 9H), 7.66 – 7.83 (m, 1H).  $^{13}C$  NMR ( $CDCl_3$ , 75 MHz):  $\delta$  21.6, 31.1, 38.6, 45.9, 110.0, 120.2, 122.7, 123.1, 126.4, 127.2, 128.4, 128.7, 128.9, 131.1, 131.2, 131.8, 136.0, 137.7, 140.7, 142.8, 152.6, 175.3, 177.0. ESI-MS(TOF)  $m/z$ :  $[M+H]^+$  Calcd for  $[C_{25}H_{22}N_3O_2]^+$   $m/z$ : 396.1707, found 396.1700.

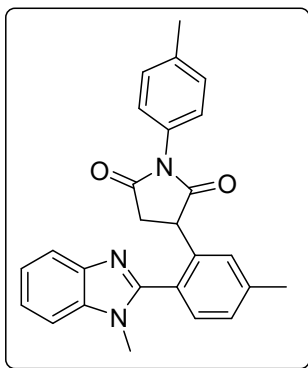

**3-(5-methyl-2-(1-methyl-1H-benzo[d]imidazol-2-yl)phenyl)-1-(p-tolyl)pyrrolidine-2,5-dione (3m).** Yield 0.082 g (80%), white solid.  $^1\text{H}$  NMR ( $\text{CDCl}_3$ , 300 MHz): 2.28 (d,  $J = 2.5$  Hz, 3H), 2.46 (d,  $J = 2.6$  Hz, 3H), 3.32 (dd,  $J = 18.1, 9.8$  Hz, 1H), 3.51 – 3.72 (m, 4H), 4.31 (dd,  $J = 9.7, 6.2$  Hz, 1H), 6.38 – 6.52 (m, 2H), 7.02 (d,  $J = 8.2$  Hz, 2H), 7.21 – 7.42 (m, 6H), 7.61 – 7.84 (m, 1H).  $^{13}\text{C}$  NMR ( $\text{CDCl}_3$ , 75 MHz):  $\delta$  21.2, 31.1, 38.5, 46.0, 55.6, 110.0, 112.8, 116.5, 120.1, 122.4, 122.6, 123.1, 126.3, 129.1, 129.7, 132.6, 136.0, 138.5, 139.5, 142.8, 152.5, 161.0, 175.4, 176.9. ESI-MS(TOF)  $m/z$ :  $[\text{M}+\text{H}]^+$  Calcd for  $[\text{C}_{26}\text{H}_{24}\text{N}_3\text{O}_2]^+$   $m/z$ : 410.1863, found 410.1869.

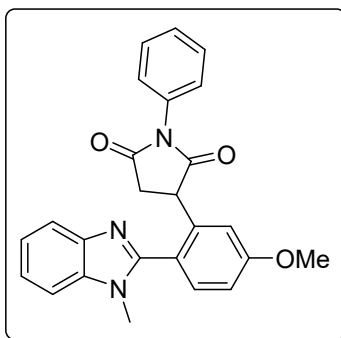

**3-(5-methoxy-2-(1-methyl-1H-benzo[d]imidazol-2-yl)phenyl)-1-phenylpyrrolidine-2,5-dione (3n).** Yield 0.083 g (81%), white solid. NMR ( $\text{CDCl}_3$ , 300 MHz): 3.33 (dd,  $J = 18.2, 9.8$  Hz, 1H), 3.58 – 3.71 (m, 4H), 3.91 (s, 3H), 4.33 (dd,  $J = 9.8, 6.3$  Hz, 1H), 6.52 – 6.65 (m, 1H), 6.92 – 7.06 (m, 2H), 7.22 (dd,  $J = 5.2, 1.9$  Hz, 3H), 7.27 – 7.41 (m, 4H), 7.69 – 7.77 (m, 1H).  $^{13}\text{C}$  NMR ( $\text{CDCl}_3$ , 75 MHz):  $\delta$  31.1, 38.5, 46.0, 55.6, 109.9, 112.8, 116.6, 120.1, 122.3, 122.6, 123.1, 126.4, 128.4, 129.0, 131.7, 132.6, 136.0, 139.4, 142.8, 152.5, 161.0, 175.2, 176.7. ESI-MS(TOF)  $m/z$ :  $[\text{M}+\text{H}]^+$  Calcd for  $[\text{C}_{25}\text{H}_{22}\text{N}_3\text{O}_3]^+$   $m/z$ : 412.1656, found 412.1666.

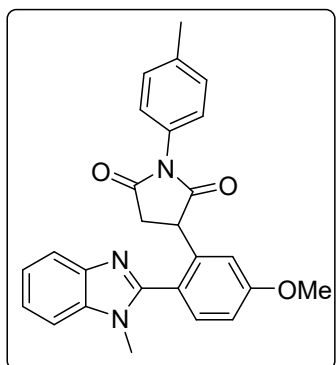

**3-(5-methoxy-2-(1-methyl-1H-benzo[d]imidazol-2-yl)phenyl)-1-(p-tolyl)pyrrolidine-2,5-dione (3o).** Yield 0.076 g (72%), white solid.  $^1\text{H}$  NMR ( $\text{CDCl}_3$ , 300 MHz): 2.28 (s, 3H), 3.32 (dd,  $J = 18.1, 9.8$  Hz, 1H), 3.50 – 3.73 (m, 3H), 3.90 (s, 2H), 4.31 (dd,  $J = 9.8, 6.2$  Hz, 1H), 6.45 (d,  $J = 8.1$  Hz, 2H), 6.87 – 7.11 (m, 4H), 7.24 – 7.42 (m, 4H), 7.73 (dd,  $J = 7.8, 1.3$  Hz, 1H).  $^{13}\text{C}$  NMR ( $\text{CDCl}_3$ , 75 MHz):  $\delta$  21.2, 21.6, 31.1, 38.6, 45.8, 110.0, 120.2, 122.6, 123.1, 126.3, 127.3, 128.7, 129.1, 129.7, 131.1, 136.0, 137.7, 138.5, 140.7, 142.8, 175.5, 177.2. ESI-MS(TOF)  $m/z$ :  $[\text{M}+\text{H}]^+$  Calcd for  $[\text{C}_{26}\text{H}_{24}\text{N}_3\text{O}_3]^+$   $m/z$ : 426.1812, found 426.1822.

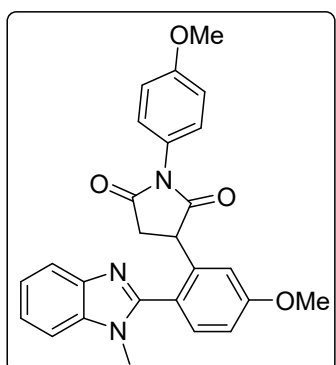

**3-(5-methoxy-2-(1-methyl-1H-benzo[d]imidazol-2-yl)phenyl)-1-(4-methoxyphenyl)pyrrolidine-2,5-dione (3p).** Yield 0.072 g

(65%), white solid.  $^1\text{H}$  NMR ( $\text{CDCl}_3$ , 300 MHz): 3.30 (dd,  $J = 18.2, 9.8$  Hz, 1H), 3.66 (s, 4H), 3.74 (s, 3H), 3.90 (s, 3H), 4.30 (dd,  $J = 9.8, 6.3$  Hz, 1H), 6.36 – 6.55 (m, 2H), 6.62 – 6.78 (m, 2H), 6.90 – 7.09 (m, 2H), 7.26 – 7.42 (m, 4H), 7.73 (dd,  $J = 7.0, 1.8$  Hz, 1H).  $^{13}\text{C}$  NMR ( $\text{CDCl}_3$ , 75 MHz):  $\delta$  31.1, 38.5, 46.0, 55.5, 55.6, 110.0, 112.8, 114.3, 116.6, 120.1, 122.3, 122.6, 123.1, 124.4, 127.6, 132.6, 136.0, 139.4, 142.8, 152.5, 159.3, 161.0, 175.5, 177.0. ESI-MS(TOF)  $m/z$ :  $[\text{M}+\text{H}]^+$  Calcd for  $[\text{C}_{26}\text{H}_{24}\text{N}_3\text{O}_4]^+$   $m/z$ : 442.1761, found 442.1770.

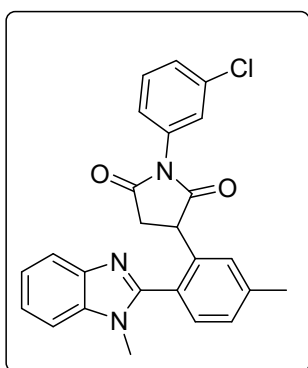

**1-(3-chlorophenyl)-3-(5-methyl-2-(1-methyl-1H-**

**benzo[d]imidazol-2-yl)phenyl)pyrrolidine-2,5-dione (3q).** Yield

0.083 g (77%), white solid.  $^1\text{H}$  NMR ( $\text{CDCl}_3$ , 300 MHz): 2.48 (s, 3H), 3.31 (ddd,  $J = 18.2, 9.9, 1.4$  Hz, 1H), 3.66 (s, 3H), 3.68 – 3.81 (m, 1H), 4.19 – 4.42 (m, 1H), 6.42 – 6.55 (m, 2H), 7.04 – 7.24 (m, 3H), 7.24 – 7.42 (m, 5H), 7.71 (d,  $J = 8.0$  Hz, 1H).  $^{13}\text{C}$  NMR ( $\text{CDCl}_3$ , 75 MHz):  $\delta$  21.5, 31.1, 38.7, 46.3, 109.9, 120.1, 122.8, 123.5, 124.6, 126.6, 127.0,

128.6, 128.8, 129.8, 131.2, 131.9, 132.8, 134.4, 135.9, 137.4, 140.7, 142.6, 152.6, 174.9, 176.6. ESI-MS(TOF)  $m/z$ :  $[\text{M}+\text{H}]^+$  Calcd for  $[\text{C}_{25}\text{H}_{21}\text{ClN}_3\text{O}_2]^+$   $m/z$ : 430.1317, found 430.1323.

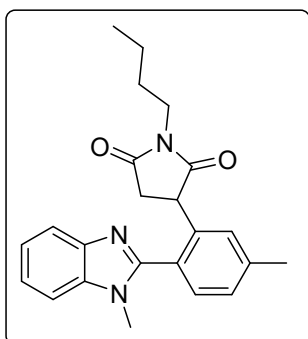

**1-butyl-3-(5-methyl-2-(1-methyl-1H-benzo[d]imidazol-2-**

**yl)phenyl)pyrrolidine-2,5-dione (3r).** Yield 0.080 g (85%), yellowish

oil.  $^1\text{H}$  NMR ( $\text{CDCl}_3$ , 300 MHz): 0.80 (d,  $J = 6.6$  Hz, 3H), 1.05 – 1.27 (m, 4H), 2.43 (s, 3H), 2.91 – 3.31 (m, 3H), 3.68 (s, 3H), 4.11 (dd,  $J = 9.2, 6.0$  Hz, 1H), 7.10 (d,  $J = 1.6$  Hz, 1H), 7.21 – 7.43 (m, 5H), 7.72 (dd,  $J = 6.7, 2.0$  Hz, 1H).  $^{13}\text{C}$  NMR ( $\text{CDCl}_3$ , 75 MHz):  $\delta$  31.6, 37.6,

41.1, 42.7, 109.9, 120.1, 122.8, 123.5, 127.6, 128.0, 128.4, 128.7, 128.8, 135.9, 136.2, 139.7, 142.8, 146.6, 175.9, 177.3. ESI-MS(TOF)  $m/z$ :  $[\text{M}+\text{H}]^+$  Calcd for  $[\text{C}_{23}\text{H}_{26}\text{N}_3\text{O}_2]^+$   $m/z$ : 376.2020, found 376.2025.

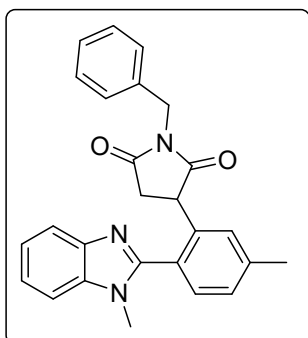

**1-benzyl-3-(5-methyl-2-(1-methyl-1H-benzo[d]imidazol-2-**

**yl)phenyl)pyrrolidine-2,5-dione (3s).** Yield 0.089 g (87%), yellowish

oil.  $^1\text{H}$  NMR ( $\text{CDCl}_3$ , 300 MHz): 3.11 – 3.23 (m, 2H), 3.70 (s, 3H), 4.04 (d,  $J = 14.1$  Hz, 1H), 4.12 (dd,  $J = 8.1, 6.8$  Hz, 1H), 4.26 (d,  $J = 14.1$  Hz, 1H), 7.01 (d,  $J = 1.6$  Hz, 1H), 7.24 (s, 5H), 7.26 – 7.46 (m, 5H), 7.66 – 7.81 (m, 1H).  $^{13}\text{C}$  NMR ( $\text{CDCl}_3$ , 75 MHz):  $\delta$  21.5, 31.2, 38.6,

42.3, 44.8, 109.8, 120.0, 122.6, 123.1, 127.2, 127.9, 128.6, 128.7, 128.8, 130.0, 130.8, 135.9, 135.9, 138.4, 140.8, 142.6, 152.5, 176.1, 177.8. ESI-MS(TOF)  $m/z$ :  $[M+H]^+$  Calcd for  $[C_{26}H_{24}N_3O_2]^+$   $m/z$ : 410.1863, found 410.1850.

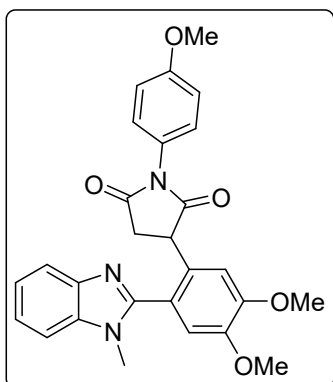

### 3-(4,5-dimethoxy-2-(1-methyl-1H-benzo[d]imidazol-2-yl)phenyl)-1-(4-methoxyphenyl)pyrrolidine-2,5-dione (3t).

Yield 0.077 g (65%), white solid.  $^1H$  NMR ( $CDCl_3$ , 300 MHz): 3.29 (dd,  $J = 18.1, 9.8$  Hz, 1H), 3.49 – 3.85 (m, 7H), 3.89 (s, 3H), 3.98 (s, 3H), 4.20 (dd,  $J = 9.7, 6.2$  Hz, 1H), 6.38 – 6.52 (m, 2H), 6.66 – 6.75 (m, 2H), 6.89 (d,  $J = 13.0$  Hz, 2H), 7.28 – 7.42 (m, 3H), 7.74 (d,  $J = 7.5$  Hz, 1H).  $^{13}C$  NMR ( $CDCl_3$ , 75 MHz):  $\delta$  31.1, 38.7, 45.7, 55.5, 56.2,

56.4, 110.0, 113.0, 113.8, 114.3, 120.2, 122.3, 122.7, 123.2, 127.6, 130.7, 135.9, 142.7, 148.4, 150.5, 152.5, 154.6, 159.4, 175.5, 177.2. ESI-MS(TOF)  $m/z$ :  $[M+H]^+$  Calcd for  $[C_{27}H_{26}N_3O_5]^+$   $m/z$ : 472.1867, found 472.1877.

### Synthesis of complex 4

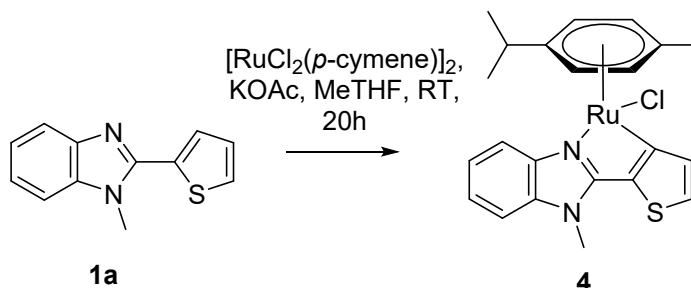

Synthesis of complex 4 was performed according to previous reported method<sup>7</sup> with little modifications. A mixture of  $[RuCl_2(p\text{-cymene})]_2$  (0.061 g, 0.1 mmol), compound **1a** (0.043 g, 0.2 mmol) and dry KOAc (0.02 g, 0.2 mmol) in 10 ml of 2-MeTHF was stirred under an argon atmosphere at 25 °C for 20 h. Then, the reaction mixture was filtered and evaporated in vacuo. The crude product was purified by column chromatography on  $SiO_2$  using a mixture of DCM-EtOAc (1:1) as the eluent. The obtained product was washed with  $Et_2O$  and dried in vacuo. Yield 0.041 g (40%), orange powder, mp = 201–202 °C (decomposition).  $^1H$  NMR ( $CDCl_3$ , 300 MHz): 0.86 (d,  $J = 6.9$  Hz, 3H), 0.99 (d,  $J = 7.0$  Hz, 3H), 2.07 (s, 3H), 2.40 (p,  $J = 6.9$  Hz, 1H), 3.95 (s, 3H), 5.26 (dd,  $J = 5.8, 1.2$  Hz, 1H), 5.34 – 5.48 (m, 1H), 5.78 (d,  $J = 5.7$  Hz, 1H), 5.81 (d,  $J = 5.8$  Hz, 1H), 7.26 – 7.40 (m, 3H), 7.60 (d,  $J = 4.7$  Hz, 1H), 7.73 – 7.84 (m, 2H).  $^{13}C$  NMR ( $CDCl_3$ , 75 MHz):  $\delta = 19.1, 21.9, 22.9, 31.2, 31.3, 81.0, 81.2, 87.3, 87.4, 100.3, 100.4, 109.8, 115.7, 122.3,$

122.6, 123.2, 128.7, 135.6, 137.1, 142.1, 157.2, 186.0. HRMS (ESI) m/z: [M-Cl]<sup>+</sup> calcd for [C<sub>23</sub>H<sub>17</sub>N<sub>2</sub>OS]<sup>+</sup> m/z: 369.1056, found m/z 369.1062.

### Gram-scale experiment

The reaction was performed under air atmosphere in a round bottom flask equipped with a magnetic stir bar. A mixture of compound **1e** (1.19 g, 5 mmol), the maleimide **2ab** (1.31 g, 7 mmol), KOAc (0.98 g, 10 mmol), and [RuCl<sub>2</sub>(*p*-cymene)]<sub>2</sub> in 2-methyltetrahydrofuran (20 mL) was refluxed appropriate time (see table S4) while stirring. After being cooled to room temperature, the mixture was filtered through a short pad of Celite. The filtrate was concentrated under reduced pressure, and the crude product was purified by column chromatography on silica gel using a hexane/EtOAc (1:1) mixture as the eluent to obtain compound **3m**.

**Table S4** Influence catalyst loading on yield of **3m**

| Catalyst Loading | Time (h) | Yield of <b>3m</b> | TON   |
|------------------|----------|--------------------|-------|
| 7.0 mol%         | 12       | 68%                | 9.71  |
| 2.5 mol%         | 12       | 28%                | 11.20 |
| 2.5 mol%         | 24       | 35%                | 14.00 |

### S3. X-ray crystallographic data and refinement details.

X-ray diffraction data were collected at 100K on a four-circle Rigaku XtaLAB Synergy-S diffractometer equipped with a HyPix-6000HE area detector (kappa geometry, shutterless  $\omega$ -scan technique), using monochromatized Cu  $K_{\alpha}$ -radiation. The intensity data were integrated and corrected for absorption and decay by the CrysAlisPro program.<sup>S7</sup> The structure was solved by direct methods using SHELXT-2014/5<sup>S8</sup> and refined on  $F^2$  using SHELXL-2018/3<sup>S9</sup> in the OLEX2 program.<sup>S10</sup> All non-hydrogen atoms were refined with individual anisotropic displacement parameters. All hydrogen atoms were placed in ideal calculated positions and refined as riding atoms with relative isotropic displacement parameters; bond distances to H-atoms were refined. A rotating group model was applied for methyl groups.

**Table S5.** Crystal data, data collection and structure refinement details for **3a** and **3m**

| Identification code                                | <b>3a</b>                                                       | <b>3m</b>                                                     |
|----------------------------------------------------|-----------------------------------------------------------------|---------------------------------------------------------------|
| Moiety formula                                     | C <sub>22</sub> H <sub>17</sub> N <sub>3</sub> O <sub>2</sub> S | C <sub>26</sub> H <sub>23</sub> N <sub>3</sub> O <sub>3</sub> |
| Formula weight                                     | 387.44                                                          | 425.47                                                        |
| Temperature, K                                     | 100.0(3)                                                        | 100.0(2)                                                      |
| Wavelength, Å                                      | 1.54184                                                         | 1.54184                                                       |
| Crystal system                                     | Monoclinic                                                      | Monoclinic                                                    |
| Space group                                        | Cc                                                              | P2 <sub>1</sub>                                               |
| Unit cell dimensions                               |                                                                 |                                                               |
| a, Å                                               | 12.77135(6)                                                     | 9.40197(15)                                                   |
| b, Å                                               | 14.83370(7)                                                     | 9.52044(13)                                                   |
| c, Å                                               | 9.99137(5)                                                      | 12.31548(18)                                                  |
| $\alpha$ , °                                       | 90                                                              | 90.0                                                          |
| $\beta$ , °                                        | 103.1472(4)                                                     | 110.1561(17)                                                  |
| $\gamma$ , °                                       | 90                                                              | 90.0                                                          |
| Volume, Å <sup>3</sup>                             | 1843.215(16)                                                    | 1034.86(3)                                                    |
| Z                                                  | 4                                                               | 2                                                             |
| Calculated density, g·cm <sup>-3</sup>             | 1.396                                                           | 1.365                                                         |
| Absorption coefficient ( $\mu$ ), mm <sup>-1</sup> | 1.755                                                           | 0.731                                                         |
| F(000)                                             | 808                                                             | 448                                                           |
| Crystal size, mm                                   | 0.616×0.254×0.166                                               | 0.243×0.241×0.153                                             |
| $\theta$ range for data collection, °              | 4.640 – 79.848                                                  | 3.823 – 79.901                                                |
| Index ranges                                       | -16 ≤ h ≤ 16,                                                   | -11 ≤ h ≤ 11,                                                 |

|                                                                        | -18 ≤ k ≤ 18,<br>-12 ≤ l ≤ 11 | -12 ≤ k ≤ 12,<br>-15 ≤ l ≤ 15 |
|------------------------------------------------------------------------|-------------------------------|-------------------------------|
| Reflections                                                            |                               |                               |
| Collected                                                              | 30432                         | 43379                         |
| Independent [R <sub>int</sub> ]                                        | 3862 [0.0322]                 | 8582 [0.0509]                 |
| Observed with I > 2σ(I)                                                | 3855                          | 8517                          |
| Completeness to θ <sub>full</sub> /θ <sub>max</sub>                    | 100%                          | 100%                          |
| Transmission max/min                                                   | 1.000/0.386                   | 0.919/0.861                   |
| Data/restraints/parameters                                             | 3862/2/269                    | 8582/1/309                    |
| Goodness-of-fit on F <sup>2</sup>                                      | 1.037                         | 1.064                         |
| R <sub>1</sub> /ωR <sub>2</sub> for I > 2σ(I)                          | 0.0233/0.0606                 | 0.0362/0.1028                 |
| R <sub>1</sub> /ωR <sub>2</sub> for all data                           | 0.0234/0.0606                 | 0.0364/0.1032                 |
| Extinction coefficient                                                 | 0.00233(19)                   | -                             |
| Δρ <sub>max</sub> /Δρ <sub>min</sub> , e <sup>-</sup> ·Å <sup>-3</sup> | 0.207/-0.147                  | 0.276 /-0.204                 |
| CCDC deposition number                                                 | 2494737                       | 2494738                       |

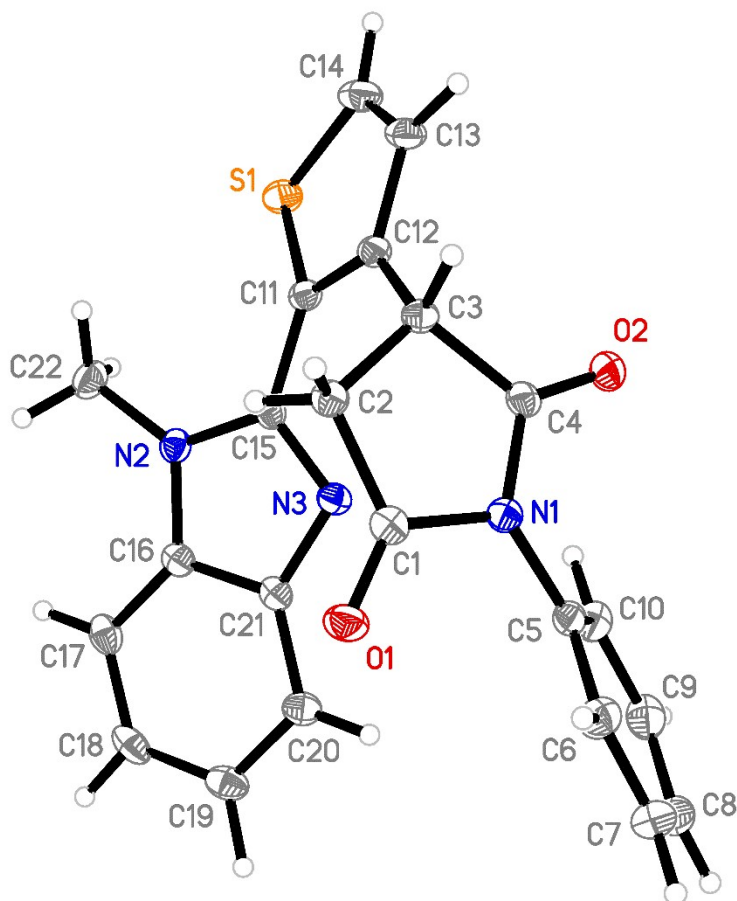

**Figure S3.** The crystal structure of **3a**. Displacement ellipsoids of nonhydrogen atoms are set to a 50% probability level.

**Table S6.** Atomic coordinates ( $\times 10^4$ ) and equivalent isotropic displacement parameters ( $\text{\AA}^2 \times 10^3$ ) for **3a**.  $U(\text{eq})$  is defined as one third of the trace of the orthogonalized  $U_{ij}$  tensor.

|       | x       | y       | z       | U(eq) |
|-------|---------|---------|---------|-------|
| S(1)  | 8269(1) | 4922(1) | 5084(1) | 20(1) |
| N(1)  | 4057(1) | 5749(1) | 5892(2) | 15(1) |
| C(1)  | 4602(1) | 6377(1) | 6855(2) | 17(1) |
| C(2)  | 5670(1) | 5981(1) | 7581(2) | 17(1) |
| C(3)  | 5735(1) | 5063(1) | 6902(2) | 16(1) |
| C(4)  | 4689(2) | 4994(1) | 5804(2) | 16(1) |
| O(1)  | 4249(1) | 7110(1) | 7048(1) | 22(1) |
| O(2)  | 4429(1) | 4374(1) | 5014(2) | 21(1) |
| C(5)  | 3140(1) | 5992(1) | 4830(2) | 16(1) |
| C(6)  | 2259(2) | 6405(1) | 5163(2) | 23(1) |
| C(7)  | 1415(2) | 6695(1) | 4106(2) | 28(1) |
| C(8)  | 1443(2) | 6565(1) | 2744(2) | 27(1) |
| C(9)  | 2324(2) | 6139(1) | 2422(2) | 25(1) |
| C(10) | 3178(1) | 5860(1) | 3463(2) | 20(1) |
| C(11) | 7186(1) | 5441(1) | 5540(2) | 15(1) |
| C(12) | 6705(1) | 4868(1) | 6316(2) | 16(1) |
| C(13) | 7230(2) | 4018(1) | 6520(2) | 20(1) |
| C(14) | 8082(2) | 3948(1) | 5920(2) | 23(1) |
| C(15) | 6788(1) | 6316(1) | 4978(2) | 15(1) |
| N(2)  | 7406(1) | 7030(1) | 4720(2) | 16(1) |
| N(3)  | 5746(1) | 6492(1) | 4648(2) | 16(1) |
| C(16) | 6697(1) | 7708(1) | 4178(2) | 16(1) |
| C(17) | 6869(2) | 8584(1) | 3750(2) | 20(1) |
| C(18) | 5960(2) | 9108(1) | 3306(2) | 22(1) |
| C(19) | 4921(2) | 8780(1) | 3284(2) | 21(1) |
| C(20) | 4757(1) | 7911(1) | 3704(2) | 18(1) |
| C(21) | 5668(1) | 7370(1) | 4157(2) | 15(1) |
| C(22) | 8573(1) | 7099(1) | 4919(2) | 23(1) |

**Table S7.** Bond lengths [Å] and angles [°] for **3a**.

---

|             |            |
|-------------|------------|
| S(1)-C(11)  | 1.7321(17) |
| S(1)-C(14)  | 1.712(2)   |
| N(1)-C(1)   | 1.405(2)   |
| N(1)-C(4)   | 1.394(2)   |
| N(1)-C(5)   | 1.437(2)   |
| C(1)-C(2)   | 1.510(2)   |
| C(1)-O(1)   | 1.208(2)   |
| C(2)-H(2A)  | 0.936(18)  |
| C(2)-H(2B)  | 0.936(19)  |
| C(2)-C(3)   | 1.532(2)   |
| C(3)-H(3)   | 0.95(3)    |
| C(3)-C(4)   | 1.527(2)   |
| C(3)-C(12)  | 1.513(2)   |
| C(4)-O(2)   | 1.208(2)   |
| C(5)-C(6)   | 1.386(3)   |
| C(5)-C(10)  | 1.392(3)   |
| C(6)-H(6)   | 0.95(3)    |
| C(6)-C(7)   | 1.395(3)   |
| C(7)-H(7)   | 0.95(3)    |
| C(7)-C(8)   | 1.383(3)   |
| C(8)-H(8)   | 0.97(3)    |
| C(8)-C(9)   | 1.390(3)   |
| C(9)-H(9)   | 0.99(3)    |
| C(9)-C(10)  | 1.388(3)   |
| C(10)-H(10) | 0.99(3)    |
| C(11)-C(12) | 1.384(3)   |
| C(11)-C(15) | 1.459(2)   |
| C(12)-C(13) | 1.421(2)   |
| C(13)-H(13) | 0.99(3)    |
| C(13)-C(14) | 1.360(3)   |
| C(14)-H(14) | 0.96(3)    |
| C(15)-N(2)  | 1.380(2)   |
| C(15)-N(3)  | 1.322(2)   |
| N(2)-C(16)  | 1.380(2)   |
| N(2)-C(22)  | 1.463(2)   |
| N(3)-C(21)  | 1.387(2)   |
| C(16)-C(17) | 1.400(2)   |
| C(16)-C(21) | 1.402(2)   |

|                  |            |
|------------------|------------|
| C(17)-H(17)      | 0.96(3)    |
| C(17)-C(18)      | 1.384(3)   |
| C(18)-H(18)      | 0.96(3)    |
| C(18)-C(19)      | 1.408(3)   |
| C(19)-H(19)      | 1.01(3)    |
| C(19)-C(20)      | 1.386(3)   |
| C(20)-H(20)      | 0.94(3)    |
| C(20)-C(21)      | 1.400(2)   |
| C(22)-H(22A)     | 0.953(17)  |
| C(22)-H(22B)     | 0.953(16)  |
| C(22)-H(22C)     | 0.953(16)  |
|                  |            |
| C(14)-S(1)-C(11) | 92.17(9)   |
| C(1)-N(1)-C(5)   | 122.18(14) |
| C(4)-N(1)-C(1)   | 111.85(14) |
| C(4)-N(1)-C(5)   | 122.78(15) |
| N(1)-C(1)-C(2)   | 108.87(14) |
| O(1)-C(1)-N(1)   | 124.11(17) |
| O(1)-C(1)-C(2)   | 127.03(17) |
| C(1)-C(2)-H(2A)  | 110.6      |
| C(1)-C(2)-H(2B)  | 110.6      |
| C(1)-C(2)-C(3)   | 105.49(14) |
| H(2A)-C(2)-H(2B) | 108.8      |
| C(3)-C(2)-H(2A)  | 110.6      |
| C(3)-C(2)-H(2B)  | 110.6      |
| C(2)-C(3)-H(3)   | 107.3      |
| C(4)-C(3)-C(2)   | 104.55(13) |
| C(4)-C(3)-H(3)   | 107.3      |
| C(12)-C(3)-C(2)  | 118.22(14) |
| C(12)-C(3)-H(3)  | 107.3      |
| C(12)-C(3)-C(4)  | 111.62(15) |
| N(1)-C(4)-C(3)   | 108.96(15) |
| O(2)-C(4)-N(1)   | 125.12(17) |
| O(2)-C(4)-C(3)   | 125.88(16) |
| C(6)-C(5)-N(1)   | 120.22(17) |
| C(6)-C(5)-C(10)  | 120.65(17) |
| C(10)-C(5)-N(1)  | 119.00(16) |
| C(5)-C(6)-H(6)   | 120.5      |
| C(5)-C(6)-C(7)   | 119.0(2)   |
| C(7)-C(6)-H(6)   | 120.5      |

|                   |            |
|-------------------|------------|
| C(6)-C(7)-H(7)    | 119.6      |
| C(8)-C(7)-C(6)    | 120.89(19) |
| C(8)-C(7)-H(7)    | 119.6      |
| C(7)-C(8)-H(8)    | 120.2      |
| C(7)-C(8)-C(9)    | 119.63(19) |
| C(9)-C(8)-H(8)    | 120.2      |
| C(8)-C(9)-H(9)    | 119.9      |
| C(10)-C(9)-C(8)   | 120.1(2)   |
| C(10)-C(9)-H(9)   | 119.9      |
| C(5)-C(10)-H(10)  | 120.1      |
| C(9)-C(10)-C(5)   | 119.72(18) |
| C(9)-C(10)-H(10)  | 120.1      |
| C(12)-C(11)-S(1)  | 110.97(13) |
| C(12)-C(11)-C(15) | 126.92(16) |
| C(15)-C(11)-S(1)  | 121.55(13) |
| C(11)-C(12)-C(3)  | 127.32(16) |
| C(11)-C(12)-C(13) | 111.66(16) |
| C(13)-C(12)-C(3)  | 121.02(16) |
| C(12)-C(13)-H(13) | 123.1      |
| C(14)-C(13)-C(12) | 113.81(17) |
| C(14)-C(13)-H(13) | 123.1      |
| S(1)-C(14)-H(14)  | 124.3      |
| C(13)-C(14)-S(1)  | 111.39(13) |
| C(13)-C(14)-H(14) | 124.3      |
| N(2)-C(15)-C(11)  | 126.20(15) |
| N(3)-C(15)-C(11)  | 120.99(15) |
| N(3)-C(15)-N(2)   | 112.81(15) |
| C(15)-N(2)-C(16)  | 106.32(14) |
| C(15)-N(2)-C(22)  | 129.63(15) |
| C(16)-N(2)-C(22)  | 124.03(15) |
| C(15)-N(3)-C(21)  | 105.16(14) |
| N(2)-C(16)-C(17)  | 131.42(16) |
| N(2)-C(16)-C(21)  | 105.91(15) |
| C(17)-C(16)-C(21) | 122.63(16) |
| C(16)-C(17)-H(17) | 121.9      |
| C(18)-C(17)-C(16) | 116.10(17) |
| C(18)-C(17)-H(17) | 121.9      |
| C(17)-C(18)-H(18) | 119.0      |
| C(17)-C(18)-C(19) | 121.96(17) |
| C(19)-C(18)-H(18) | 119.0      |

|                     |            |
|---------------------|------------|
| C(18)-C(19)-H(19)   | 119.2      |
| C(20)-C(19)-C(18)   | 121.56(17) |
| C(20)-C(19)-H(19)   | 119.2      |
| C(19)-C(20)-H(20)   | 121.3      |
| C(19)-C(20)-C(21)   | 117.32(17) |
| C(21)-C(20)-H(20)   | 121.3      |
| N(3)-C(21)-C(16)    | 109.78(15) |
| N(3)-C(21)-C(20)    | 129.79(16) |
| C(20)-C(21)-C(16)   | 120.42(16) |
| N(2)-C(22)-H(22A)   | 109.5      |
| N(2)-C(22)-H(22B)   | 109.5      |
| N(2)-C(22)-H(22C)   | 109.5      |
| H(22A)-C(22)-H(22B) | 109.5      |
| H(22A)-C(22)-H(22C) | 109.5      |
| H(22B)-C(22)-H(22C) | 109.5      |

---

**Table S8.** Anisotropic displacement parameters ( $\text{\AA}^2 \times 10^3$ ) for **3a**. The anisotropic displacement factor exponent takes the form:  $-2p^2 [ h^2 a^* 2U^{11} + \dots + 2 h k a^* b^* U^{12} ]$

|       | U <sup>11</sup> | U <sup>22</sup> | U <sup>33</sup> | U <sup>23</sup> | U <sup>13</sup> | U <sup>12</sup> |
|-------|-----------------|-----------------|-----------------|-----------------|-----------------|-----------------|
| S(1)  | 18(1)           | 21(1)           | 23(1)           | -1(1)           | 6(1)            | 5(1)            |
| N(1)  | 16(1)           | 15(1)           | 14(1)           | 1(1)            | 3(1)            | 0(1)            |
| C(1)  | 19(1)           | 17(1)           | 14(1)           | 1(1)            | 6(1)            | 0(1)            |
| C(2)  | 19(1)           | 17(1)           | 14(1)           | 0(1)            | 3(1)            | 1(1)            |
| C(3)  | 18(1)           | 16(1)           | 14(1)           | 3(1)            | 2(1)            | 1(1)            |
| C(4)  | 17(1)           | 15(1)           | 17(1)           | 3(1)            | 6(1)            | -1(1)           |
| O(1)  | 24(1)           | 18(1)           | 23(1)           | -3(1)           | 3(1)            | 5(1)            |
| O(2)  | 20(1)           | 17(1)           | 26(1)           | -5(1)           | 3(1)            | -1(1)           |
| C(5)  | 16(1)           | 15(1)           | 17(1)           | 3(1)            | 2(1)            | -2(1)           |
| C(6)  | 20(1)           | 24(1)           | 24(1)           | 1(1)            | 6(1)            | 1(1)            |
| C(7)  | 20(1)           | 24(1)           | 38(1)           | 2(1)            | 3(1)            | 4(1)            |
| C(8)  | 23(1)           | 22(1)           | 32(1)           | 7(1)            | -5(1)           | -1(1)           |
| C(9)  | 28(1)           | 25(1)           | 19(1)           | 4(1)            | 1(1)            | -5(1)           |
| C(10) | 20(1)           | 23(1)           | 18(1)           | 2(1)            | 4(1)            | -2(1)           |
| C(11) | 15(1)           | 16(1)           | 15(1)           | -1(1)           | 2(1)            | 2(1)            |
| C(12) | 16(1)           | 14(1)           | 14(1)           | -1(1)           | 0(1)            | 1(1)            |
| C(13) | 24(1)           | 16(1)           | 17(1)           | 2(1)            | 1(1)            | 5(1)            |
| C(14) | 26(1)           | 19(1)           | 22(1)           | 0(1)            | 3(1)            | 8(1)            |
| C(15) | 16(1)           | 14(1)           | 13(1)           | -2(1)           | 3(1)            | -1(1)           |
| N(2)  | 16(1)           | 17(1)           | 14(1)           | 0(1)            | 3(1)            | -2(1)           |
| N(3)  | 16(1)           | 14(1)           | 17(1)           | 1(1)            | 4(1)            | 1(1)            |
| C(16) | 21(1)           | 15(1)           | 12(1)           | -1(1)           | 3(1)            | 0(1)            |
| C(17) | 26(1)           | 17(1)           | 16(1)           | 0(1)            | 6(1)            | -5(1)           |
| C(18) | 35(1)           | 12(1)           | 18(1)           | 1(1)            | 7(1)            | -1(1)           |
| C(19) | 29(1)           | 18(1)           | 16(1)           | 1(1)            | 6(1)            | 6(1)            |
| C(20) | 20(1)           | 18(1)           | 18(1)           | 1(1)            | 6(1)            | 3(1)            |
| C(21) | 20(1)           | 14(1)           | 12(1)           | 0(1)            | 4(1)            | 0(1)            |
| C(22) | 16(1)           | 26(1)           | 26(1)           | 5(1)            | 2(1)            | -4(1)           |

**Table S9.** Hydrogen coordinates ( $\times 10^4$ ) and isotropic displacement parameters ( $\text{\AA}^2 \times 10^3$ ) for **3a**.

|        | x        | y        | z        | U(eq) |
|--------|----------|----------|----------|-------|
| H(2A)  | 5701(2)  | 5912(2)  | 8520(19) | 20    |
| H(2B)  | 6236(11) | 6354(7)  | 7474(3)  | 20    |
| H(3)   | 5712(2)  | 4613(13) | 7575(19) | 19    |
| H(6)   | 2231(2)  | 6489(3)  | 6090(30) | 27    |
| H(7)   | 810(20)  | 6986(10) | 4325(8)  | 34    |
| H(8)   | 851(18)  | 6772(6)  | 2020(20) | 33    |
| H(9)   | 2341(2)  | 6034(4)  | 1450(30) | 30    |
| H(10)  | 3812(17) | 5568(8)  | 3234(6)  | 24    |
| H(13)  | 6997(7)  | 3522(14) | 7050(15) | 23    |
| H(14)  | 8521(13) | 3421(16) | 5960(2)  | 27    |
| H(17)  | 7578(19) | 8808(6)  | 3764(2)  | 24    |
| H(18)  | 6039(3)  | 9710(19) | 3006(9)  | 26    |
| H(19)  | 4278(17) | 9189(11) | 2952(9)  | 25    |
| H(20)  | 4070(20) | 7694(6)  | 3685(2)  | 22    |
| H(22A) | 8790(4)  | 7707(11) | 5127(18) | 34    |
| H(22B) | 8777(4)  | 6918(12) | 4100(16) | 34    |
| H(22C) | 8913(6)  | 6718(11) | 5658(18) | 34    |

**Table S10.** Torsion angles [°] for **3a**.

---

|                         |             |
|-------------------------|-------------|
| S(1)-C(11)-C(12)-C(3)   | -179.49(15) |
| S(1)-C(11)-C(12)-C(13)  | -0.1(2)     |
| S(1)-C(11)-C(15)-N(2)   | -37.9(2)    |
| S(1)-C(11)-C(15)-N(3)   | 141.44(15)  |
| N(1)-C(1)-C(2)-C(3)     | 2.73(19)    |
| N(1)-C(5)-C(6)-C(7)     | 175.27(17)  |
| N(1)-C(5)-C(10)-C(9)    | -176.35(16) |
| C(1)-N(1)-C(4)-C(3)     | 5.7(2)      |
| C(1)-N(1)-C(4)-O(2)     | -176.65(17) |
| C(1)-N(1)-C(5)-C(6)     | -54.7(2)    |
| C(1)-N(1)-C(5)-C(10)    | 121.34(18)  |
| C(1)-C(2)-C(3)-C(4)     | 0.52(18)    |
| C(1)-C(2)-C(3)-C(12)    | 125.34(16)  |
| C(2)-C(3)-C(4)-N(1)     | -3.63(19)   |
| C(2)-C(3)-C(4)-O(2)     | 178.71(18)  |
| C(2)-C(3)-C(12)-C(11)   | -43.6(3)    |
| C(2)-C(3)-C(12)-C(13)   | 137.09(17)  |
| C(3)-C(12)-C(13)-C(14)  | 179.52(17)  |
| C(4)-N(1)-C(1)-C(2)     | -5.3(2)     |
| C(4)-N(1)-C(1)-O(1)     | 174.88(18)  |
| C(4)-N(1)-C(5)-C(6)     | 147.12(17)  |
| C(4)-N(1)-C(5)-C(10)    | -36.9(2)    |
| C(4)-C(3)-C(12)-C(11)   | 77.7(2)     |
| C(4)-C(3)-C(12)-C(13)   | -101.64(19) |
| O(1)-C(1)-C(2)-C(3)     | -177.48(18) |
| C(5)-N(1)-C(1)-C(2)     | -165.65(15) |
| C(5)-N(1)-C(1)-O(1)     | 14.5(3)     |
| C(5)-N(1)-C(4)-C(3)     | 165.86(15)  |
| C(5)-N(1)-C(4)-O(2)     | -16.5(3)    |
| C(5)-C(6)-C(7)-C(8)     | 0.8(3)      |
| C(6)-C(5)-C(10)-C(9)    | -0.3(3)     |
| C(6)-C(7)-C(8)-C(9)     | 0.2(3)      |
| C(7)-C(8)-C(9)-C(10)    | -1.2(3)     |
| C(8)-C(9)-C(10)-C(5)    | 1.3(3)      |
| C(10)-C(5)-C(6)-C(7)    | -0.7(3)     |
| C(11)-S(1)-C(14)-C(13)  | -0.01(16)   |
| C(11)-C(12)-C(13)-C(14) | 0.1(2)      |
| C(11)-C(15)-N(2)-C(16)  | 179.15(17)  |

|                         |             |
|-------------------------|-------------|
| C(11)-C(15)-N(2)-C(22)  | 0.6(3)      |
| C(11)-C(15)-N(3)-C(21)  | 179.95(15)  |
| C(12)-C(3)-C(4)-N(1)    | -132.55(15) |
| C(12)-C(3)-C(4)-O(2)    | 49.8(2)     |
| C(12)-C(11)-C(15)-N(2)  | 151.39(18)  |
| C(12)-C(11)-C(15)-N(3)  | -29.2(3)    |
| C(12)-C(13)-C(14)-S(1)  | 0.0(2)      |
| C(14)-S(1)-C(11)-C(12)  | 0.06(14)    |
| C(14)-S(1)-C(11)-C(15)  | -171.98(15) |
| C(15)-C(11)-C(12)-C(3)  | -8.0(3)     |
| C(15)-C(11)-C(12)-C(13) | 171.42(17)  |
| C(15)-N(2)-C(16)-C(17)  | 178.89(19)  |
| C(15)-N(2)-C(16)-C(21)  | 0.99(18)    |
| C(15)-N(3)-C(21)-C(16)  | 1.23(19)    |
| C(15)-N(3)-C(21)-C(20)  | -177.84(19) |
| N(2)-C(15)-N(3)-C(21)   | -0.6(2)     |
| N(2)-C(16)-C(17)-C(18)  | -177.21(19) |
| N(2)-C(16)-C(21)-N(3)   | -1.40(19)   |
| N(2)-C(16)-C(21)-C(20)  | 177.77(17)  |
| N(3)-C(15)-N(2)-C(16)   | -0.3(2)     |
| N(3)-C(15)-N(2)-C(22)   | -178.86(17) |
| C(16)-C(17)-C(18)-C(19) | -0.1(3)     |
| C(17)-C(16)-C(21)-N(3)  | -179.52(16) |
| C(17)-C(16)-C(21)-C(20) | -0.4(3)     |
| C(17)-C(18)-C(19)-C(20) | -0.2(3)     |
| C(18)-C(19)-C(20)-C(21) | 0.2(3)      |
| C(19)-C(20)-C(21)-N(3)  | 179.03(17)  |
| C(19)-C(20)-C(21)-C(16) | 0.0(3)      |
| C(21)-C(16)-C(17)-C(18) | 0.4(3)      |
| C(22)-N(2)-C(16)-C(17)  | -2.4(3)     |
| C(22)-N(2)-C(16)-C(21)  | 179.69(16)  |

---

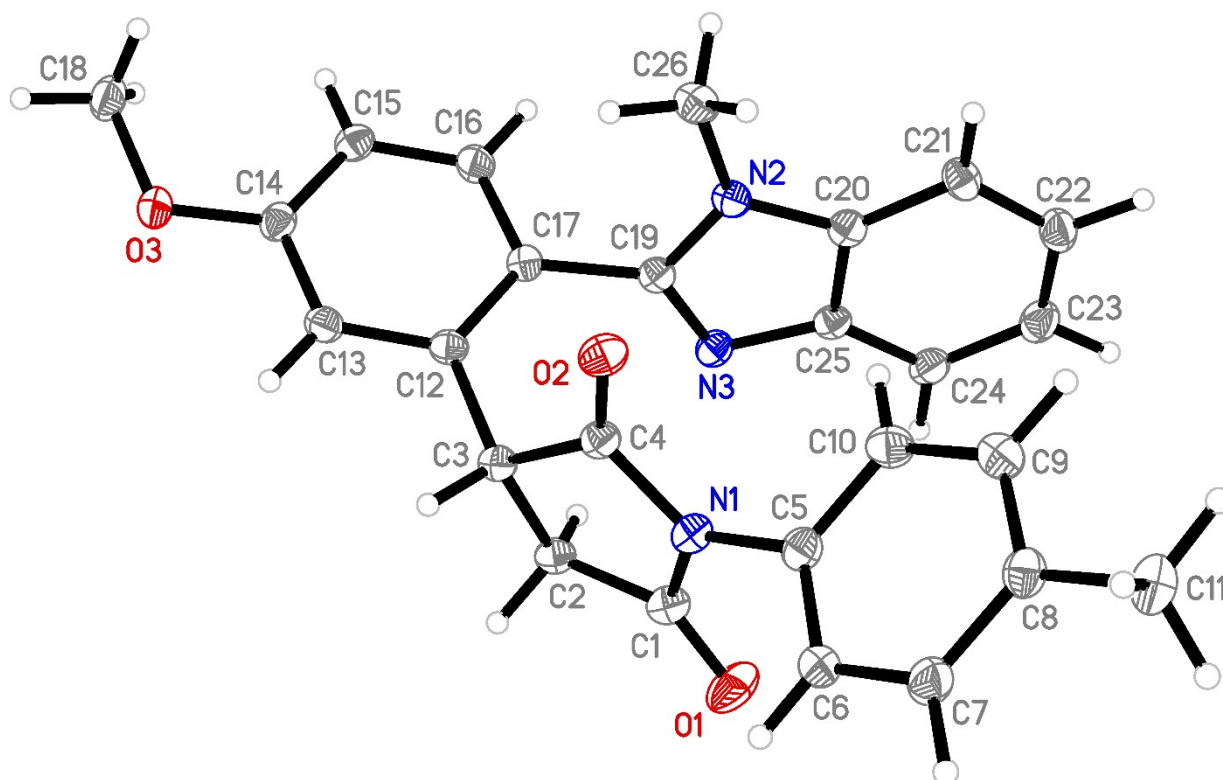

**Figure S4.** The crystal structure of **3n**. Displacement ellipsoids of nonhydrogen atoms are set to a 50% probability level.

**Table S11.** Atomic coordinates ( $\times 10^4$ ) and equivalent isotropic displacement parameters ( $\text{\AA}^2 \times 10^3$ ) for **3n**.  $U(\text{eq})$  is defined as one third of the trace of the orthogonalized  $U^{ij}$  tensor.

|      | x       | y       | z       | $U(\text{eq})$ |
|------|---------|---------|---------|----------------|
| N(1) | 4577(2) | 3927(2) | 6331(1) | 18(1)          |
| C(1) | 5712(2) | 4794(2) | 6199(2) | 21(1)          |
| C(2) | 5271(2) | 5158(2) | 4933(2) | 19(1)          |
| C(3) | 3905(2) | 4216(2) | 4309(2) | 16(1)          |
| C(4) | 3422(2) | 3638(2) | 5286(2) | 17(1)          |
| O(1) | 6817(2) | 5174(2) | 6988(1) | 32(1)          |
| O(2) | 2284(2) | 2996(2) | 5191(1) | 22(1)          |
| C(5) | 4546(2) | 3377(2) | 7409(2) | 19(1)          |
| C(6) | 5661(2) | 2452(3) | 8037(2) | 22(1)          |
| C(7) | 5562(3) | 1840(3) | 9039(2) | 24(1)          |
| C(8) | 4356(3) | 2158(2) | 9421(2) | 21(1)          |
| C(9) | 3279(3) | 3129(3) | 8788(2) | 23(1)          |

|       |         |         |          |       |
|-------|---------|---------|----------|-------|
| C(10) | 3359(3) | 3735(3) | 7784(2)  | 22(1) |
| C(11) | 4220(3) | 1462(3) | 10483(2) | 25(1) |
| C(12) | 2610(2) | 4865(2) | 3340(2)  | 17(1) |
| C(13) | 2293(2) | 4374(2) | 2218(2)  | 18(1) |
| C(14) | 1103(2) | 4934(2) | 1295(2)  | 19(1) |
| C(15) | 212(2)  | 6007(2) | 1485(2)  | 20(1) |
| C(16) | 513(2)  | 6483(2) | 2610(2)  | 20(1) |
| C(17) | 1694(2) | 5935(2) | 3540(2)  | 16(1) |
| O(3)  | 879(2)  | 4332(2) | 240(1)   | 24(1) |
| C(18) | -447(3) | 4757(3) | -700(2)  | 25(1) |
| C(19) | 1881(2) | 6462(2) | 4716(2)  | 16(1) |
| N(2)  | 842(2)  | 6136(2) | 5229(2)  | 17(1) |
| N(3)  | 2958(2) | 7321(2) | 5340(1)  | 18(1) |
| C(20) | 1279(2) | 6844(2) | 6267(2)  | 18(1) |
| C(21) | 634(3)  | 6913(2) | 7133(2)  | 20(1) |
| C(22) | 1365(3) | 7768(2) | 8067(2)  | 23(1) |
| C(23) | 2666(3) | 8543(3) | 8130(2)  | 25(1) |
| C(24) | 3302(2) | 8464(2) | 7272(2)  | 22(1) |
| C(25) | 2602(2) | 7578(2) | 6328(2)  | 17(1) |
| C(26) | -440(3) | 5179(3) | 4800(2)  | 22(1) |

---

**Table S12.** Bond lengths [Å] and angles [°] for **3n**.

---

|              |          |
|--------------|----------|
| N(1)-C(1)    | 1.403(3) |
| N(1)-C(4)    | 1.396(3) |
| N(1)-C(5)    | 1.436(2) |
| C(1)-C(2)    | 1.509(3) |
| C(1)-O(1)    | 1.208(3) |
| C(2)-H(2A)   | 1.01(2)  |
| C(2)-H(2B)   | 1.01(2)  |
| C(2)-C(3)    | 1.538(3) |
| C(3)-H(3)    | 0.97(3)  |
| C(3)-C(4)    | 1.527(3) |
| C(3)-C(12)   | 1.512(3) |
| C(4)-O(2)    | 1.203(3) |
| C(5)-C(6)    | 1.384(3) |
| C(5)-C(10)   | 1.390(3) |
| C(6)-H(6)    | 0.94(4)  |
| C(6)-C(7)    | 1.397(3) |
| C(7)-H(7)    | 1.00(4)  |
| C(7)-C(8)    | 1.401(3) |
| C(8)-C(9)    | 1.394(3) |
| C(8)-C(11)   | 1.511(3) |
| C(9)-H(9)    | 0.98(3)  |
| C(9)-C(10)   | 1.390(3) |
| C(10)-H(10)  | 0.89(4)  |
| C(11)-H(11A) | 1.01(2)  |
| C(11)-H(11B) | 1.01(2)  |
| C(11)-H(11C) | 1.01(2)  |
| C(12)-C(13)  | 1.391(3) |
| C(12)-C(17)  | 1.409(3) |
| C(13)-H(13)  | 0.94(3)  |
| C(13)-C(14)  | 1.397(3) |
| C(14)-C(15)  | 1.391(3) |
| C(14)-O(3)   | 1.368(2) |
| C(15)-H(15)  | 0.92(3)  |
| C(15)-C(16)  | 1.392(3) |
| C(16)-H(16)  | 0.97(3)  |
| C(16)-C(17)  | 1.393(3) |
| C(17)-C(19)  | 1.486(3) |
| O(3)-C(18)   | 1.436(3) |

|                  |            |
|------------------|------------|
| C(18)-H(18A)     | 0.97(2)    |
| C(18)-H(18B)     | 0.97(2)    |
| C(18)-H(18C)     | 0.97(2)    |
| C(19)-N(2)       | 1.369(3)   |
| C(19)-N(3)       | 1.322(3)   |
| N(2)-C(20)       | 1.377(3)   |
| N(2)-C(26)       | 1.457(3)   |
| N(3)-C(25)       | 1.390(3)   |
| C(20)-C(21)      | 1.398(3)   |
| C(20)-C(25)      | 1.406(3)   |
| C(21)-H(21)      | 0.93(3)    |
| C(21)-C(22)      | 1.383(3)   |
| C(22)-H(22)      | 0.99(3)    |
| C(22)-C(23)      | 1.407(4)   |
| C(23)-H(23)      | 1.02(4)    |
| C(23)-C(24)      | 1.383(3)   |
| C(24)-H(24)      | 1.04(3)    |
| C(24)-C(25)      | 1.403(3)   |
| C(26)-H(26A)     | 0.95(2)    |
| C(26)-H(26B)     | 0.95(2)    |
| C(26)-H(26C)     | 0.95(2)    |
|                  |            |
| C(1)-N(1)-C(5)   | 125.48(17) |
| C(4)-N(1)-C(1)   | 112.94(16) |
| C(4)-N(1)-C(5)   | 121.57(17) |
| N(1)-C(1)-C(2)   | 107.80(17) |
| O(1)-C(1)-N(1)   | 124.10(19) |
| O(1)-C(1)-C(2)   | 128.1(2)   |
| C(1)-C(2)-H(2A)  | 110.6      |
| C(1)-C(2)-H(2B)  | 110.6      |
| C(1)-C(2)-C(3)   | 105.53(16) |
| H(2A)-C(2)-H(2B) | 108.8      |
| C(3)-C(2)-H(2A)  | 110.6      |
| C(3)-C(2)-H(2B)  | 110.6      |
| C(2)-C(3)-H(3)   | 107.3      |
| C(4)-C(3)-C(2)   | 103.88(16) |
| C(4)-C(3)-H(3)   | 107.3      |
| C(12)-C(3)-C(2)  | 117.57(18) |
| C(12)-C(3)-H(3)  | 107.3      |
| C(12)-C(3)-C(4)  | 113.04(16) |

|                     |            |
|---------------------|------------|
| N(1)-C(4)-C(3)      | 107.94(17) |
| O(2)-C(4)-N(1)      | 124.95(18) |
| O(2)-C(4)-C(3)      | 127.05(18) |
| C(6)-C(5)-N(1)      | 119.76(19) |
| C(6)-C(5)-C(10)     | 120.7(2)   |
| C(10)-C(5)-N(1)     | 119.45(19) |
| C(5)-C(6)-H(6)      | 120.3      |
| C(5)-C(6)-C(7)      | 119.4(2)   |
| C(7)-C(6)-H(6)      | 120.3      |
| C(6)-C(7)-H(7)      | 119.5      |
| C(6)-C(7)-C(8)      | 120.9(2)   |
| C(8)-C(7)-H(7)      | 119.5      |
| C(7)-C(8)-C(11)     | 121.0(2)   |
| C(9)-C(8)-C(7)      | 118.2(2)   |
| C(9)-C(8)-C(11)     | 120.8(2)   |
| C(8)-C(9)-H(9)      | 119.3      |
| C(10)-C(9)-C(8)     | 121.4(2)   |
| C(10)-C(9)-H(9)     | 119.3      |
| C(5)-C(10)-C(9)     | 119.3(2)   |
| C(5)-C(10)-H(10)    | 120.3      |
| C(9)-C(10)-H(10)    | 120.3      |
| C(8)-C(11)-H(11A)   | 109.5      |
| C(8)-C(11)-H(11B)   | 109.5      |
| C(8)-C(11)-H(11C)   | 109.5      |
| H(11A)-C(11)-H(11B) | 109.5      |
| H(11A)-C(11)-H(11C) | 109.5      |
| H(11B)-C(11)-H(11C) | 109.5      |
| C(13)-C(12)-C(3)    | 119.00(18) |
| C(13)-C(12)-C(17)   | 118.81(18) |
| C(17)-C(12)-C(3)    | 122.18(17) |
| C(12)-C(13)-H(13)   | 119.4      |
| C(12)-C(13)-C(14)   | 121.1(2)   |
| C(14)-C(13)-H(13)   | 119.4      |
| C(15)-C(14)-C(13)   | 120.26(19) |
| O(3)-C(14)-C(13)    | 115.51(19) |
| O(3)-C(14)-C(15)    | 124.21(19) |
| C(14)-C(15)-H(15)   | 120.7      |
| C(14)-C(15)-C(16)   | 118.61(19) |
| C(16)-C(15)-H(15)   | 120.7      |
| C(15)-C(16)-H(16)   | 119.1      |

|                     |            |
|---------------------|------------|
| C(15)-C(16)-C(17)   | 121.82(19) |
| C(17)-C(16)-H(16)   | 119.1      |
| C(12)-C(17)-C(19)   | 122.69(18) |
| C(16)-C(17)-C(12)   | 119.34(17) |
| C(16)-C(17)-C(19)   | 117.89(18) |
| C(14)-O(3)-C(18)    | 117.00(17) |
| O(3)-C(18)-H(18A)   | 109.5      |
| O(3)-C(18)-H(18B)   | 109.5      |
| O(3)-C(18)-H(18C)   | 109.5      |
| H(18A)-C(18)-H(18B) | 109.5      |
| H(18A)-C(18)-H(18C) | 109.5      |
| H(18B)-C(18)-H(18C) | 109.5      |
| N(2)-C(19)-C(17)    | 120.68(18) |
| N(3)-C(19)-C(17)    | 125.80(18) |
| N(3)-C(19)-N(2)     | 113.42(17) |
| C(19)-N(2)-C(20)    | 106.59(17) |
| C(19)-N(2)-C(26)    | 127.34(17) |
| C(20)-N(2)-C(26)    | 126.01(17) |
| C(19)-N(3)-C(25)    | 104.47(17) |
| N(2)-C(20)-C(21)    | 131.5(2)   |
| N(2)-C(20)-C(25)    | 105.53(17) |
| C(21)-C(20)-C(25)   | 123.0(2)   |
| C(20)-C(21)-H(21)   | 122.0      |
| C(22)-C(21)-C(20)   | 116.1(2)   |
| C(22)-C(21)-H(21)   | 122.0      |
| C(21)-C(22)-H(22)   | 119.1      |
| C(21)-C(22)-C(23)   | 121.8(2)   |
| C(23)-C(22)-H(22)   | 119.1      |
| C(22)-C(23)-H(23)   | 119.1      |
| C(24)-C(23)-C(22)   | 121.7(2)   |
| C(24)-C(23)-H(23)   | 119.1      |
| C(23)-C(24)-H(24)   | 121.2      |
| C(23)-C(24)-C(25)   | 117.6(2)   |
| C(25)-C(24)-H(24)   | 121.2      |
| N(3)-C(25)-C(20)    | 109.98(18) |
| N(3)-C(25)-C(24)    | 130.2(2)   |
| C(24)-C(25)-C(20)   | 119.74(19) |
| N(2)-C(26)-H(26A)   | 109.5      |
| N(2)-C(26)-H(26B)   | 109.5      |
| N(2)-C(26)-H(26C)   | 109.5      |

|                     |       |
|---------------------|-------|
| H(26A)-C(26)-H(26B) | 109.5 |
| H(26A)-C(26)-H(26C) | 109.5 |
| H(26B)-C(26)-H(26C) | 109.5 |

---

**Table S13.** Anisotropic displacement parameters ( $\text{\AA}^2 \times 10^3$ ) for **3n**. The anisotropic displacement factor exponent takes the form:  $-2p^2 [ h^2 a^*2U^{11} + \dots + 2 h k a^* b^* U^{12} ]$

|       | U <sup>11</sup> | U <sup>22</sup> | U <sup>33</sup> | U <sup>23</sup> | U <sup>13</sup> | U <sup>12</sup> |
|-------|-----------------|-----------------|-----------------|-----------------|-----------------|-----------------|
| N(1)  | 18(1)           | 18(1)           | 17(1)           | 0(1)            | 4(1)            | -1(1)           |
| C(1)  | 18(1)           | 21(1)           | 22(1)           | 0(1)            | 5(1)            | 0(1)            |
| C(2)  | 16(1)           | 18(1)           | 20(1)           | 0(1)            | 5(1)            | -1(1)           |
| C(3)  | 16(1)           | 14(1)           | 19(1)           | -1(1)           | 6(1)            | 0(1)            |
| C(4)  | 17(1)           | 14(1)           | 18(1)           | 0(1)            | 4(1)            | 2(1)            |
| O(1)  | 25(1)           | 41(1)           | 24(1)           | 1(1)            | 0(1)            | -14(1)          |
| O(2)  | 19(1)           | 20(1)           | 24(1)           | 1(1)            | 5(1)            | -4(1)           |
| C(5)  | 20(1)           | 18(1)           | 18(1)           | -1(1)           | 5(1)            | -1(1)           |
| C(6)  | 21(1)           | 26(1)           | 19(1)           | -1(1)           | 7(1)            | 4(1)            |
| C(7)  | 26(1)           | 24(1)           | 19(1)           | 2(1)            | 6(1)            | 6(1)            |
| C(8)  | 24(1)           | 20(1)           | 19(1)           | -3(1)           | 7(1)            | -3(1)           |
| C(9)  | 22(1)           | 22(1)           | 26(1)           | -2(1)           | 10(1)           | 0(1)            |
| C(10) | 21(1)           | 20(1)           | 25(1)           | 2(1)            | 7(1)            | 3(1)            |
| C(11) | 32(1)           | 24(1)           | 20(1)           | -1(1)           | 9(1)            | -4(1)           |
| C(12) | 14(1)           | 16(1)           | 19(1)           | 0(1)            | 6(1)            | -1(1)           |
| C(13) | 16(1)           | 18(1)           | 21(1)           | -2(1)           | 7(1)            | 0(1)            |
| C(14) | 18(1)           | 21(1)           | 17(1)           | -2(1)           | 6(1)            | -4(1)           |
| C(15) | 18(1)           | 20(1)           | 18(1)           | 2(1)            | 3(1)            | 2(1)            |
| C(16) | 20(1)           | 17(1)           | 20(1)           | 0(1)            | 7(1)            | 4(1)            |
| C(17) | 17(1)           | 14(1)           | 17(1)           | 0(1)            | 6(1)            | -1(1)           |
| O(3)  | 23(1)           | 30(1)           | 16(1)           | -4(1)           | 5(1)            | 4(1)            |
| C(18) | 27(1)           | 28(1)           | 16(1)           | -2(1)           | 4(1)            | 3(1)            |
| C(19) | 17(1)           | 12(1)           | 18(1)           | 0(1)            | 5(1)            | 2(1)            |
| N(2)  | 17(1)           | 15(1)           | 20(1)           | -2(1)           | 6(1)            | -1(1)           |
| N(3)  | 18(1)           | 17(1)           | 17(1)           | -1(1)           | 5(1)            | -1(1)           |
| C(20) | 19(1)           | 14(1)           | 19(1)           | 1(1)            | 5(1)            | 3(1)            |
| C(21) | 23(1)           | 18(1)           | 22(1)           | 1(1)            | 11(1)           | 3(1)            |
| C(22) | 27(1)           | 24(1)           | 20(1)           | 0(1)            | 9(1)            | 7(1)            |
| C(23) | 26(1)           | 24(1)           | 21(1)           | -5(1)           | 4(1)            | 4(1)            |
| C(24) | 19(1)           | 21(1)           | 21(1)           | -2(1)           | 2(1)            | 1(1)            |
| C(25) | 16(1)           | 14(1)           | 19(1)           | 1(1)            | 4(1)            | 2(1)            |
| C(26) | 20(1)           | 18(1)           | 29(1)           | -5(1)           | 10(1)           | -4(1)           |

**Table S14.** Hydrogen coordinates ( $\times 10^4$ ) and isotropic displacement parameters ( $\text{\AA}^2 \times 10^3$ ) for **3n**.

|        | x         | y        | z         | U(eq) |
|--------|-----------|----------|-----------|-------|
| H(2A)  | 6130(20)  | 4964(5)  | 4646(7)   | 22    |
| H(2B)  | 4986(7)   | 6180(20) | 4800(4)   | 22    |
| H(3)   | 4278(13)  | 3430(30) | 3984(11)  | 20    |
| H(6)   | 6470(30)  | 2238(8)  | 7793(9)   | 27    |
| H(7)   | 6360(30)  | 1170(20) | 9490(16)  | 28    |
| H(9)   | 2450(30)  | 3389(9)  | 9056(9)   | 27    |
| H(10)  | 2650(30)  | 4350(30) | 7384(17)  | 27    |
| H(11A) | 3390(30)  | 1929(19) | 10692(12) | 38    |
| H(11B) | 5210(20)  | 1560(20) | 11147(16) | 38    |
| H(11C) | 3970(30)  | 430(20)  | 10318(7)  | 38    |
| H(13)  | 2890(20)  | 3650(30) | 2079(5)   | 22    |
| H(15)  | -560(30)  | 6395(14) | 880(20)   | 24    |
| H(16)  | -120(20)  | 7210(30) | 2751(5)   | 23    |
| H(18A) | -477(13)  | 4270(20) | -1396(16) | 37    |
| H(18B) | -414(12)  | 5760(20) | -814(12)  | 37    |
| H(18C) | -1340(20) | 4520(20) | -520(9)   | 37    |
| H(21)  | -240(30)  | 6412(19) | 7084(3)   | 24    |
| H(22)  | 961(13)   | 7837(3)  | 8710(20)  | 28    |
| H(23)  | 3154(17)  | 9180(20) | 8830(20)  | 30    |
| H(24)  | 4260(30)  | 9039(19) | 7326(2)   | 26    |
| H(26A) | -426(14)  | 4540(20) | 5393(14)  | 33    |
| H(26B) | -371(13)  | 4676(19) | 4155(18)  | 33    |
| H(26C) | -1356(19) | 5700(11) | 4573(17)  | 33    |

**Table S15.** Torsion angles [°] for **3n**.

---

|                         |             |
|-------------------------|-------------|
| N(1)-C(1)-C(2)-C(3)     | -9.4(2)     |
| N(1)-C(5)-C(6)-C(7)     | -175.3(2)   |
| N(1)-C(5)-C(10)-C(9)    | 175.8(2)    |
| C(1)-N(1)-C(4)-C(3)     | 7.7(2)      |
| C(1)-N(1)-C(4)-O(2)     | -174.9(2)   |
| C(1)-N(1)-C(5)-C(6)     | -64.1(3)    |
| C(1)-N(1)-C(5)-C(10)    | 118.6(2)    |
| C(1)-C(2)-C(3)-C(4)     | 13.3(2)     |
| C(1)-C(2)-C(3)-C(12)    | 139.03(18)  |
| C(2)-C(3)-C(4)-N(1)     | -13.0(2)    |
| C(2)-C(3)-C(4)-O(2)     | 169.7(2)    |
| C(2)-C(3)-C(12)-C(13)   | 114.7(2)    |
| C(2)-C(3)-C(12)-C(17)   | -66.4(2)    |
| C(3)-C(12)-C(13)-C(14)  | 179.64(18)  |
| C(3)-C(12)-C(17)-C(16)  | -179.61(19) |
| C(3)-C(12)-C(17)-C(19)  | -2.9(3)     |
| C(4)-N(1)-C(1)-C(2)     | 1.2(2)      |
| C(4)-N(1)-C(1)-O(1)     | -179.9(2)   |
| C(4)-N(1)-C(5)-C(6)     | 116.4(2)    |
| C(4)-N(1)-C(5)-C(10)    | -60.9(3)    |
| C(4)-C(3)-C(12)-C(13)   | -124.2(2)   |
| C(4)-C(3)-C(12)-C(17)   | 54.7(3)     |
| O(1)-C(1)-C(2)-C(3)     | 171.7(2)    |
| C(5)-N(1)-C(1)-C(2)     | -178.34(19) |
| C(5)-N(1)-C(1)-O(1)     | 0.6(4)      |
| C(5)-N(1)-C(4)-C(3)     | -172.74(17) |
| C(5)-N(1)-C(4)-O(2)     | 4.6(3)      |
| C(5)-C(6)-C(7)-C(8)     | -0.5(3)     |
| C(6)-C(5)-C(10)-C(9)    | -1.5(3)     |
| C(6)-C(7)-C(8)-C(9)     | -1.6(3)     |
| C(6)-C(7)-C(8)-C(11)    | 178.0(2)    |
| C(7)-C(8)-C(9)-C(10)    | 2.1(3)      |
| C(8)-C(9)-C(10)-C(5)    | -0.6(3)     |
| C(10)-C(5)-C(6)-C(7)    | 2.0(3)      |
| C(11)-C(8)-C(9)-C(10)   | -177.4(2)   |
| C(12)-C(3)-C(4)-N(1)    | -141.53(18) |
| C(12)-C(3)-C(4)-O(2)    | 41.2(3)     |
| C(12)-C(13)-C(14)-C(15) | 0.3(3)      |

|                         |             |
|-------------------------|-------------|
| C(12)-C(13)-C(14)-O(3)  | -178.03(19) |
| C(12)-C(17)-C(19)-N(2)  | -107.4(2)   |
| C(12)-C(17)-C(19)-N(3)  | 76.5(3)     |
| C(13)-C(12)-C(17)-C(16) | -0.7(3)     |
| C(13)-C(12)-C(17)-C(19) | 175.95(19)  |
| C(13)-C(14)-C(15)-C(16) | -1.4(3)     |
| C(13)-C(14)-O(3)-C(18)  | 172.38(19)  |
| C(14)-C(15)-C(16)-C(17) | 1.4(3)      |
| C(15)-C(14)-O(3)-C(18)  | -5.9(3)     |
| C(15)-C(16)-C(17)-C(12) | -0.3(3)     |
| C(15)-C(16)-C(17)-C(19) | -177.1(2)   |
| C(16)-C(17)-C(19)-N(2)  | 69.3(3)     |
| C(16)-C(17)-C(19)-N(3)  | -106.8(2)   |
| C(17)-C(12)-C(13)-C(14) | 0.7(3)      |
| C(17)-C(19)-N(2)-C(20)  | -176.34(18) |
| C(17)-C(19)-N(2)-C(26)  | 6.3(3)      |
| C(17)-C(19)-N(3)-C(25)  | 176.22(19)  |
| O(3)-C(14)-C(15)-C(16)  | 176.9(2)    |
| C(19)-N(2)-C(20)-C(21)  | 179.1(2)    |
| C(19)-N(2)-C(20)-C(25)  | -0.2(2)     |
| C(19)-N(3)-C(25)-C(20)  | 0.0(2)      |
| C(19)-N(3)-C(25)-C(24)  | -176.7(2)   |
| N(2)-C(19)-N(3)-C(25)   | -0.1(2)     |
| N(2)-C(20)-C(21)-C(22)  | -178.5(2)   |
| N(2)-C(20)-C(25)-N(3)   | 0.1(2)      |
| N(2)-C(20)-C(25)-C(24)  | 177.21(19)  |
| N(3)-C(19)-N(2)-C(20)   | 0.2(2)      |
| N(3)-C(19)-N(2)-C(26)   | -177.1(2)   |
| C(20)-C(21)-C(22)-C(23) | 1.1(3)      |
| C(21)-C(20)-C(25)-N(3)  | -179.26(19) |
| C(21)-C(20)-C(25)-C(24) | -2.2(3)     |
| C(21)-C(22)-C(23)-C(24) | -1.5(4)     |
| C(22)-C(23)-C(24)-C(25) | 0.1(3)      |
| C(23)-C(24)-C(25)-N(3)  | 178.1(2)    |
| C(23)-C(24)-C(25)-C(20) | 1.7(3)      |
| C(25)-C(20)-C(21)-C(22) | 0.7(3)      |
| C(26)-N(2)-C(20)-C(21)  | -3.5(4)     |
| C(26)-N(2)-C(20)-C(25)  | 177.20(19)  |

## **S4. $^1\text{H}$ and $^{13}\text{C}$ NMR spectra**

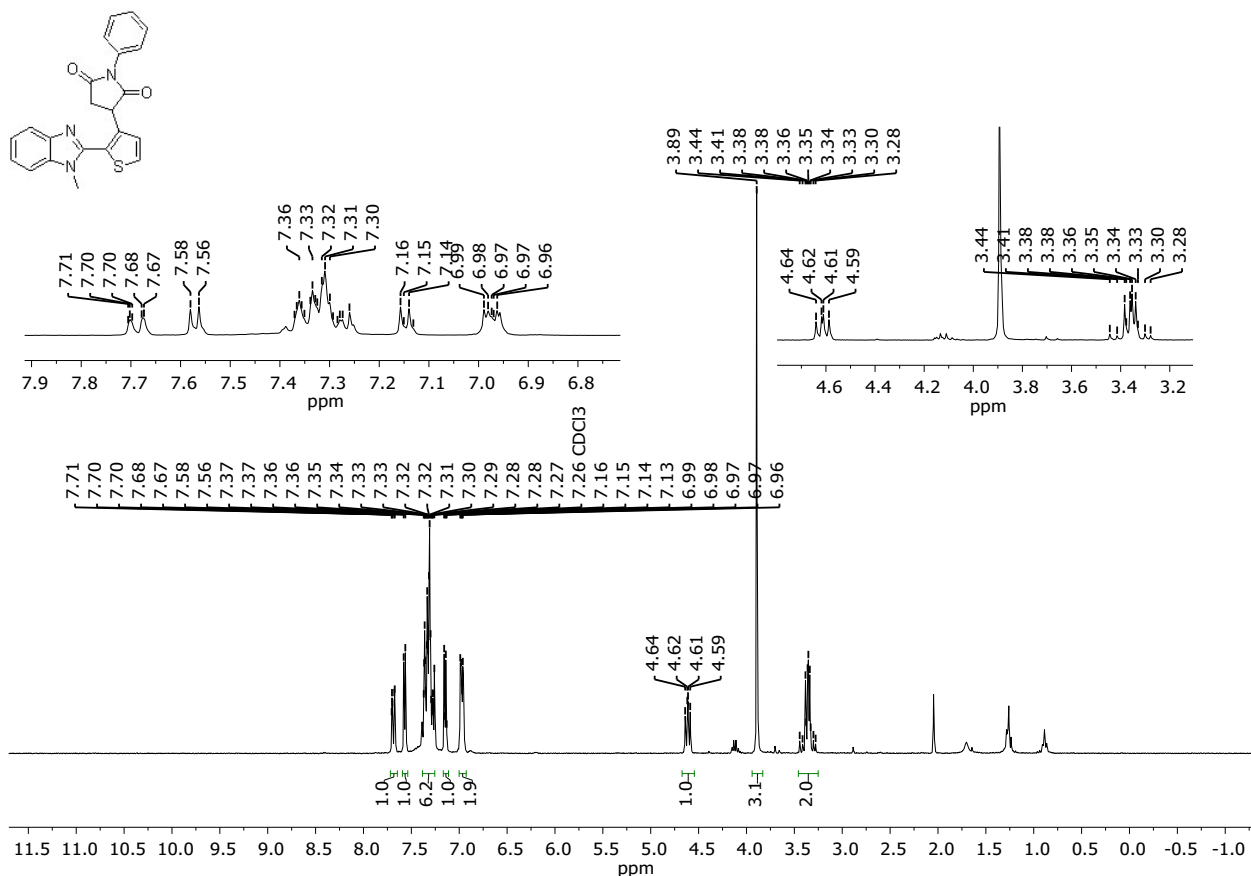

**Figure S5.**  $^1\text{H}$  NMR spectrum of compound **3a** (300 MHz,  $\text{CDCl}_3$ ).

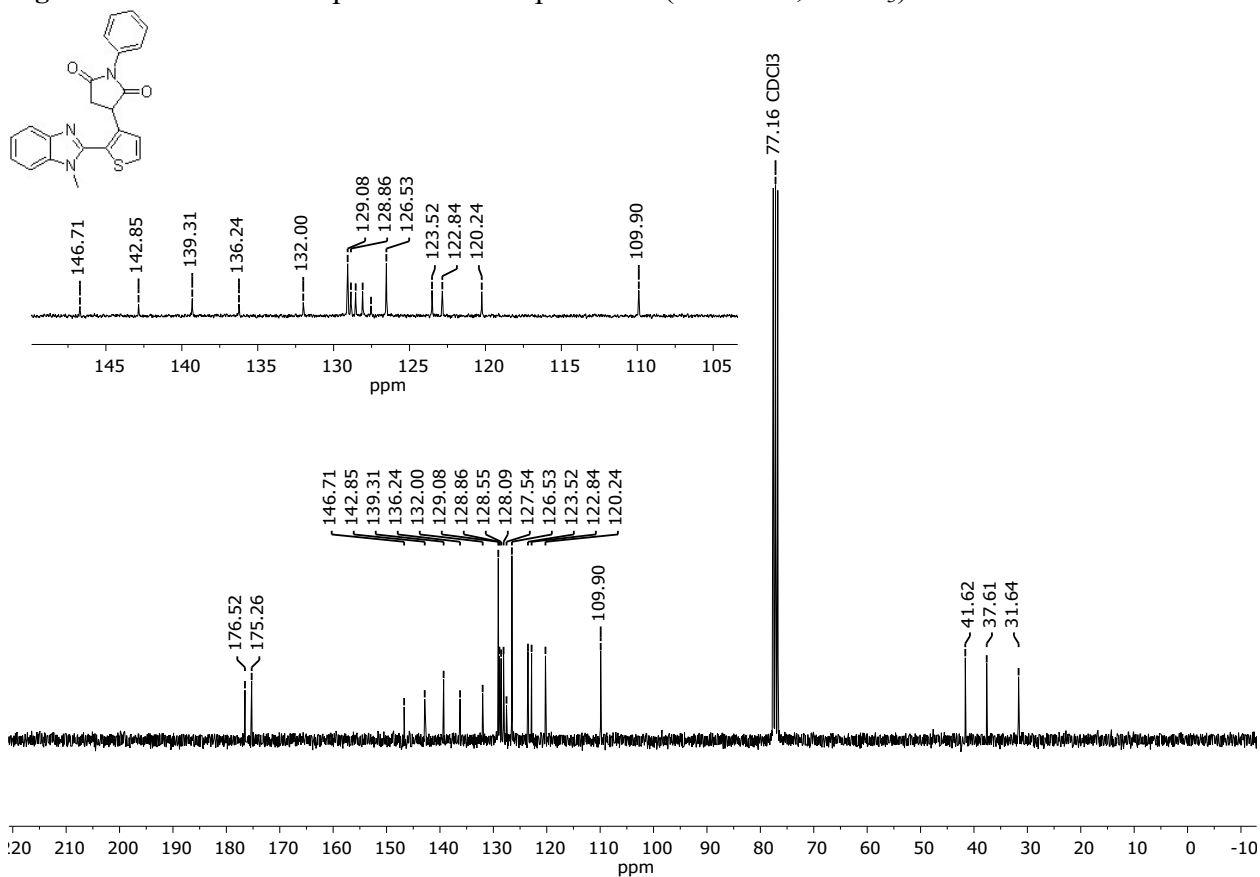

**Figure S6.**  $^{13}\text{C}$  NMR spectrum of compound **3a** (75 MHz,  $\text{CDCl}_3$ ).

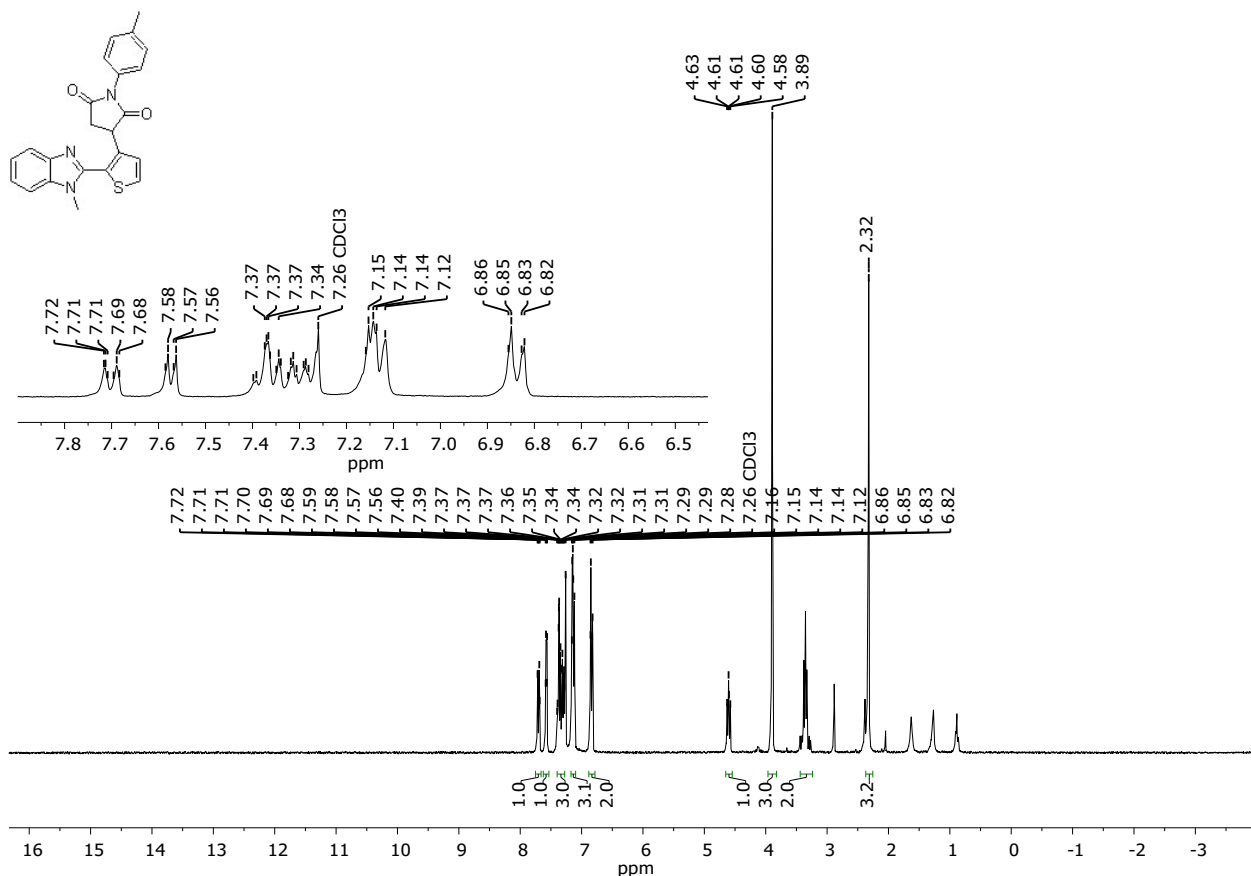

**Figure S7.**  $^1\text{H}$  NMR spectrum of compound **3b** (300 MHz,  $\text{CDCl}_3$ ).

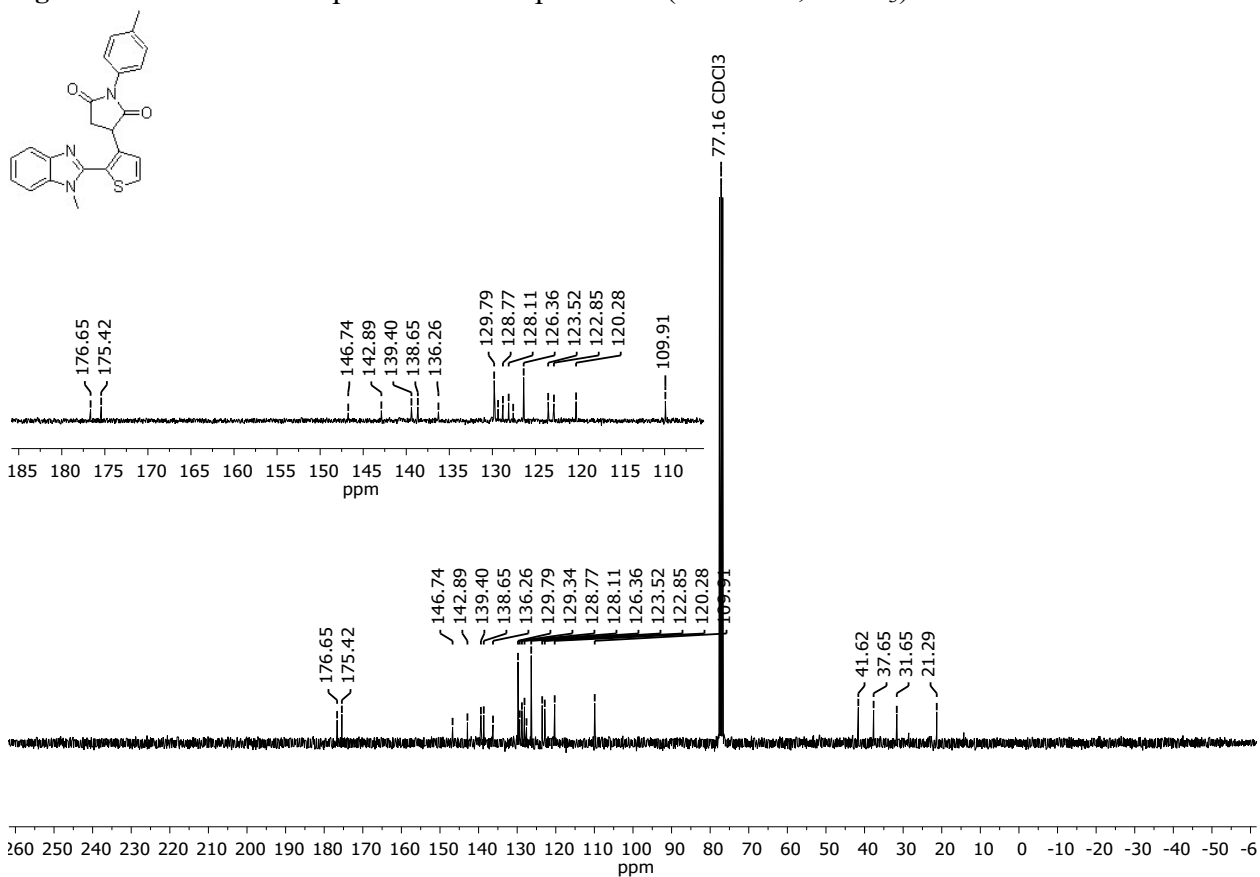

**Figure S8.**  $^{13}\text{C}$  NMR spectrum of compound **3b** (75 MHz,  $\text{CDCl}_3$ ).



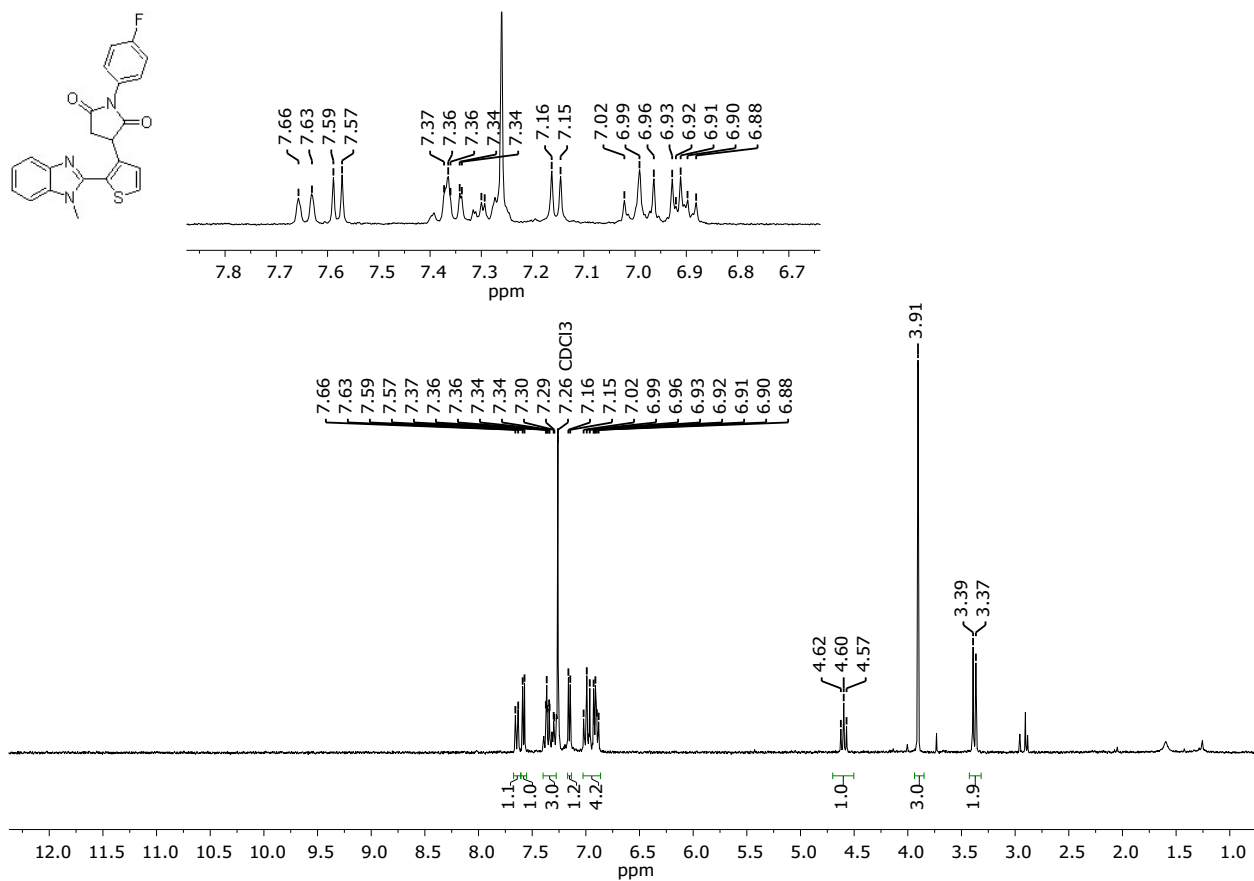

**Figure S11.**  $^1\text{H}$  NMR spectrum of compound **3d** (300 MHz,  $\text{CDCl}_3$ ).

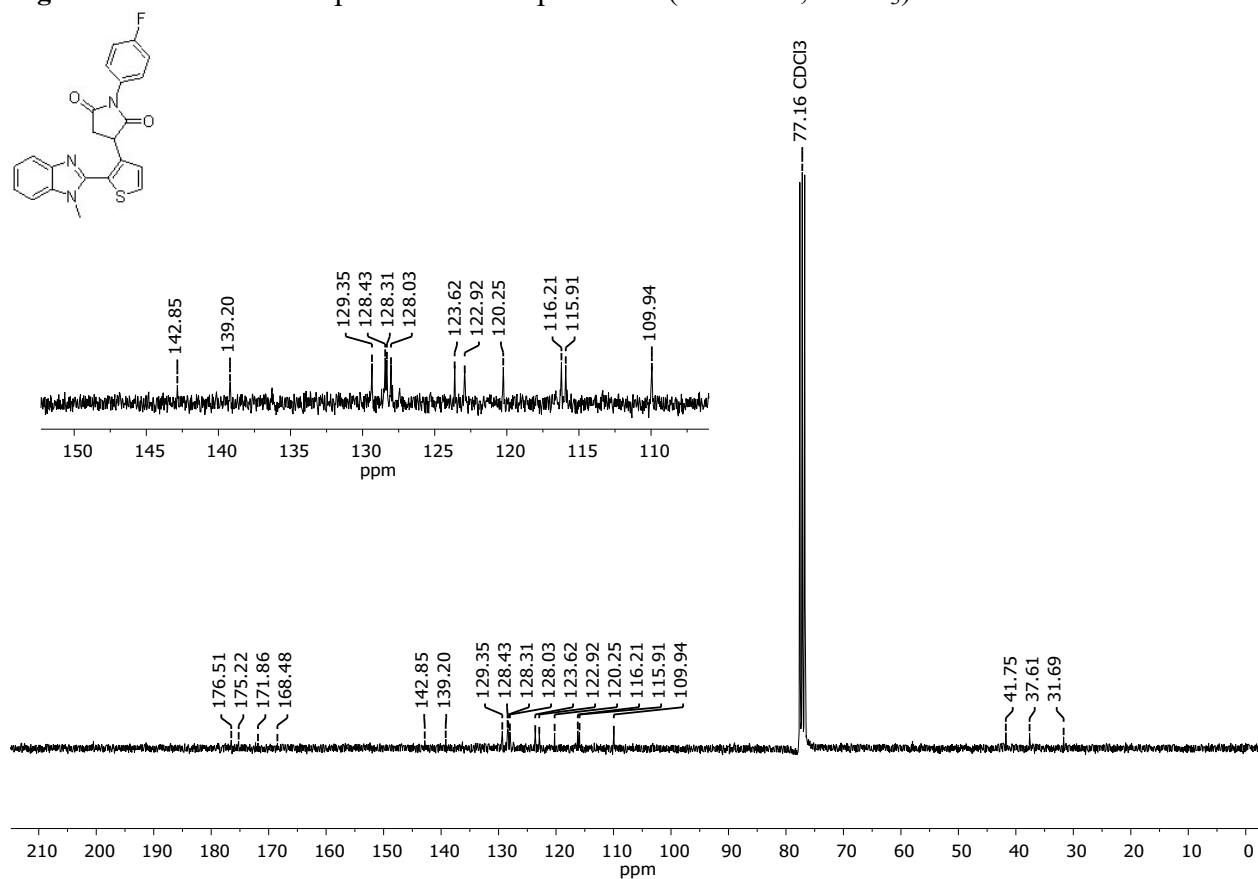

**Figure S12.**  $^{13}\text{C}$  NMR spectrum of compound **3d** (75 MHz,  $\text{CDCl}_3$ ).

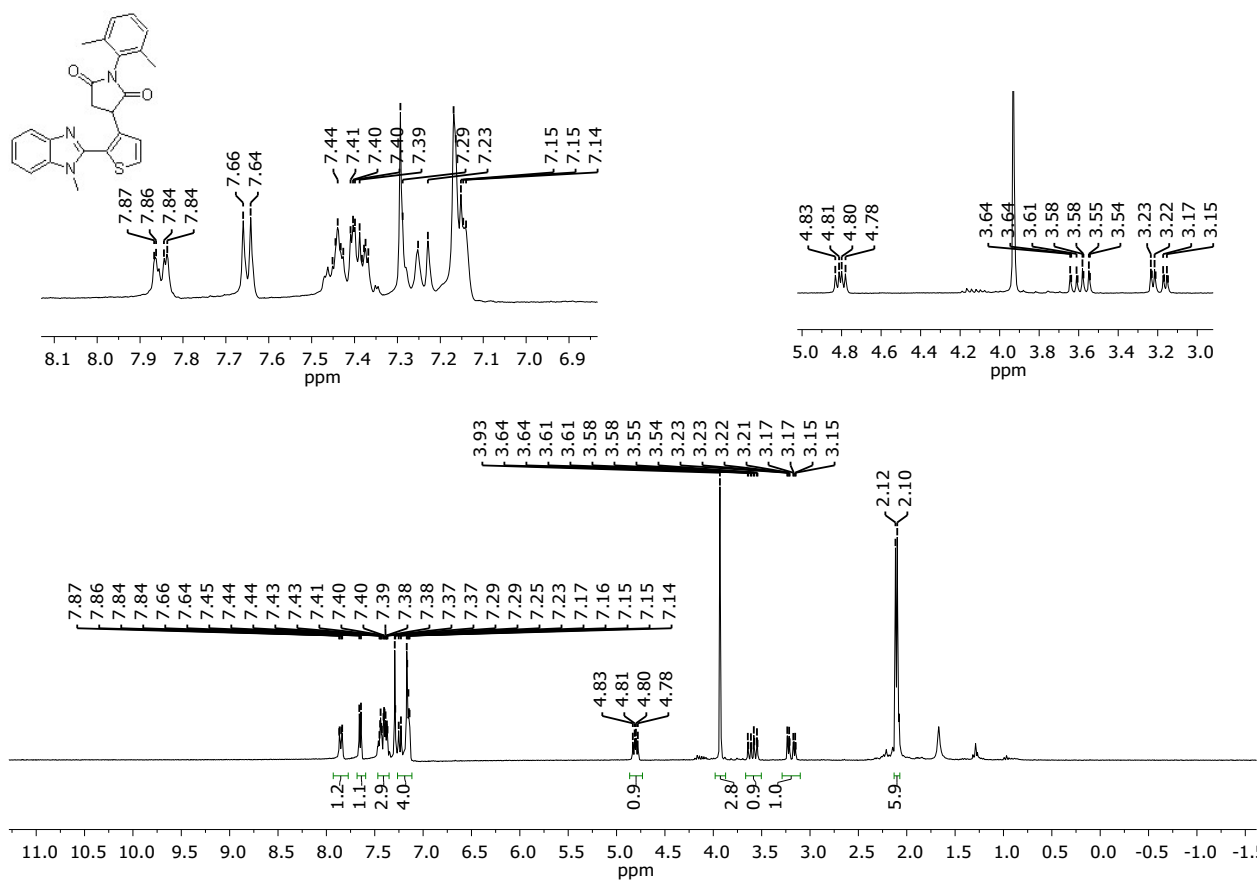

**Figure S13.**  $^1\text{H}$  NMR spectrum of compound **3e** (300 MHz,  $\text{CDCl}_3$ ).

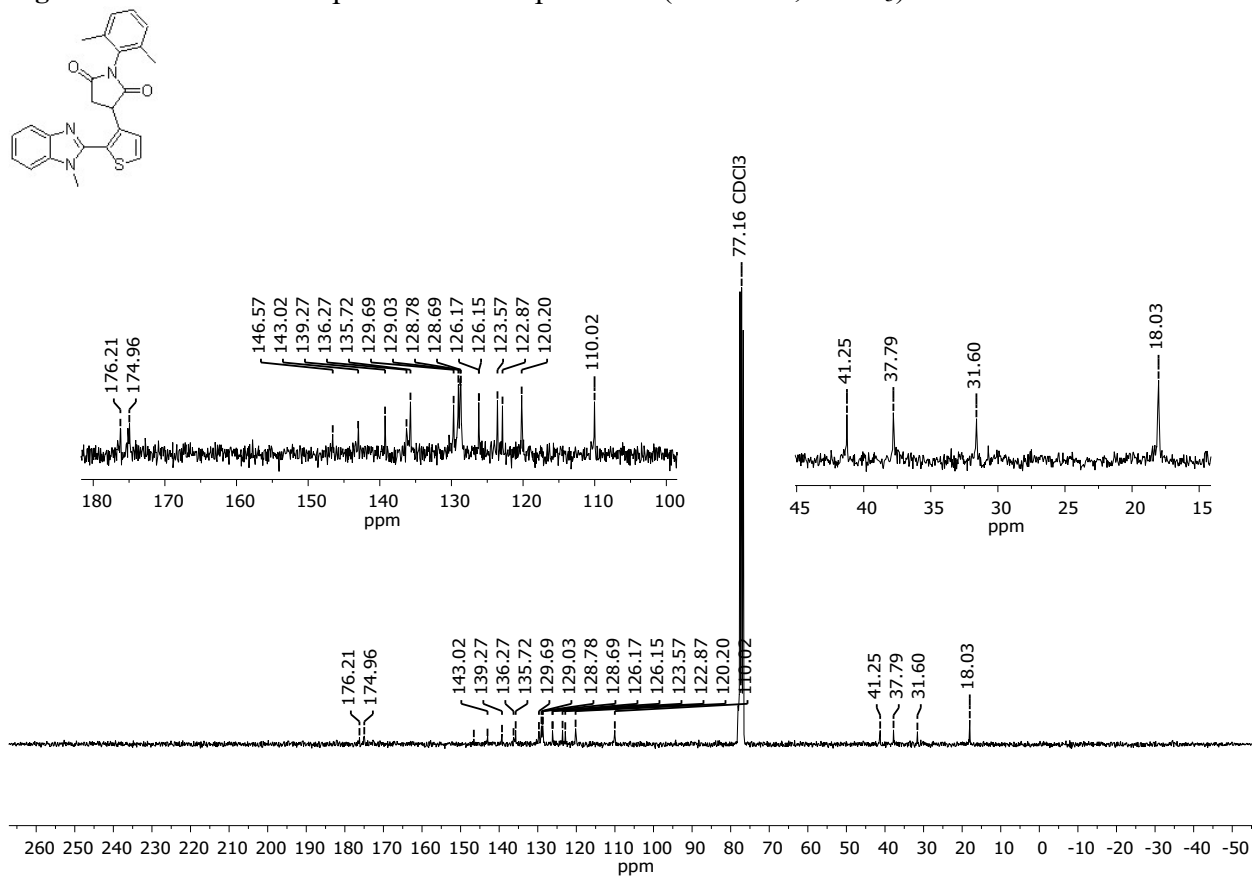

**Figure S14.**  $^{13}\text{C}$  NMR spectrum of compound **3e** (75 MHz,  $\text{CDCl}_3$ ).

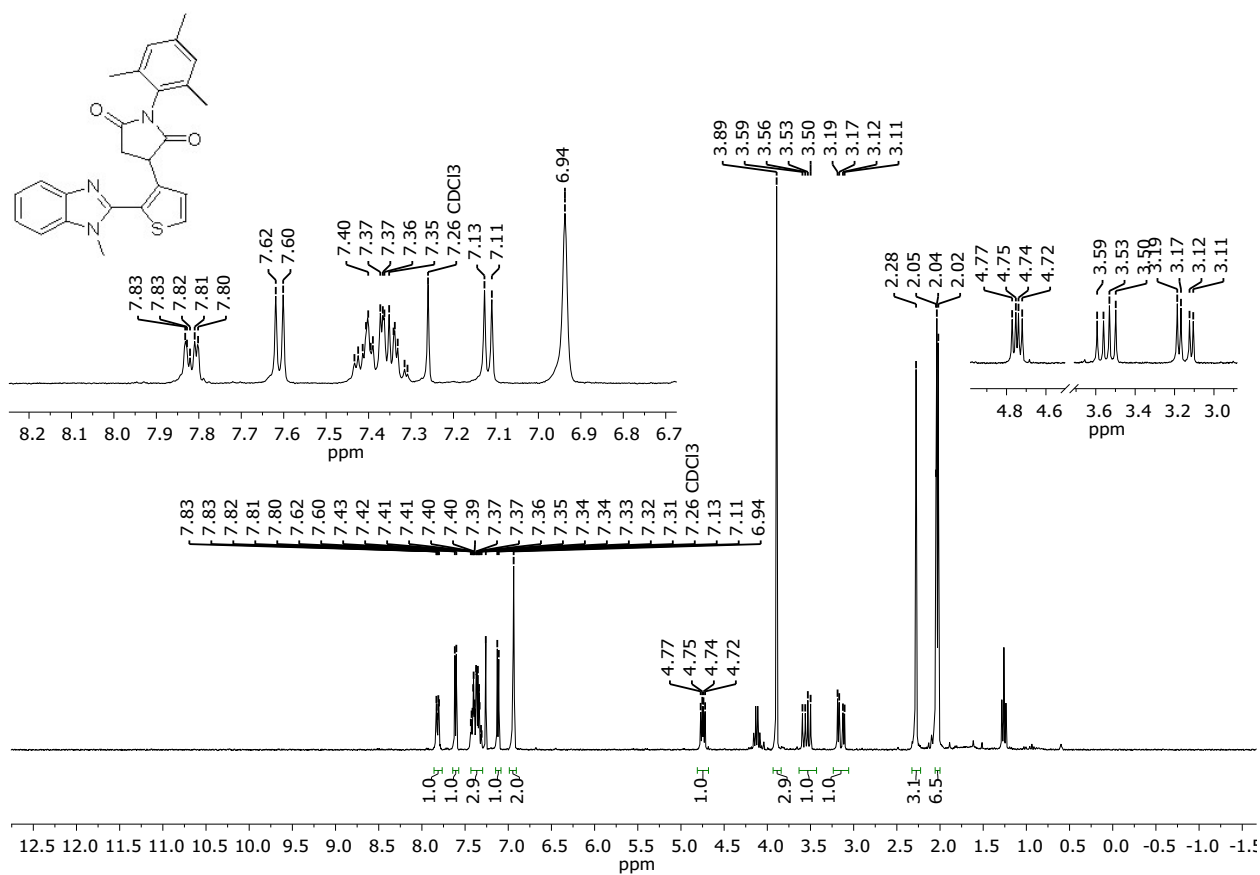

**Figure S15.** <sup>1</sup>H NMR spectrum of compound **3f** (300 MHz, CDCl<sub>3</sub>).

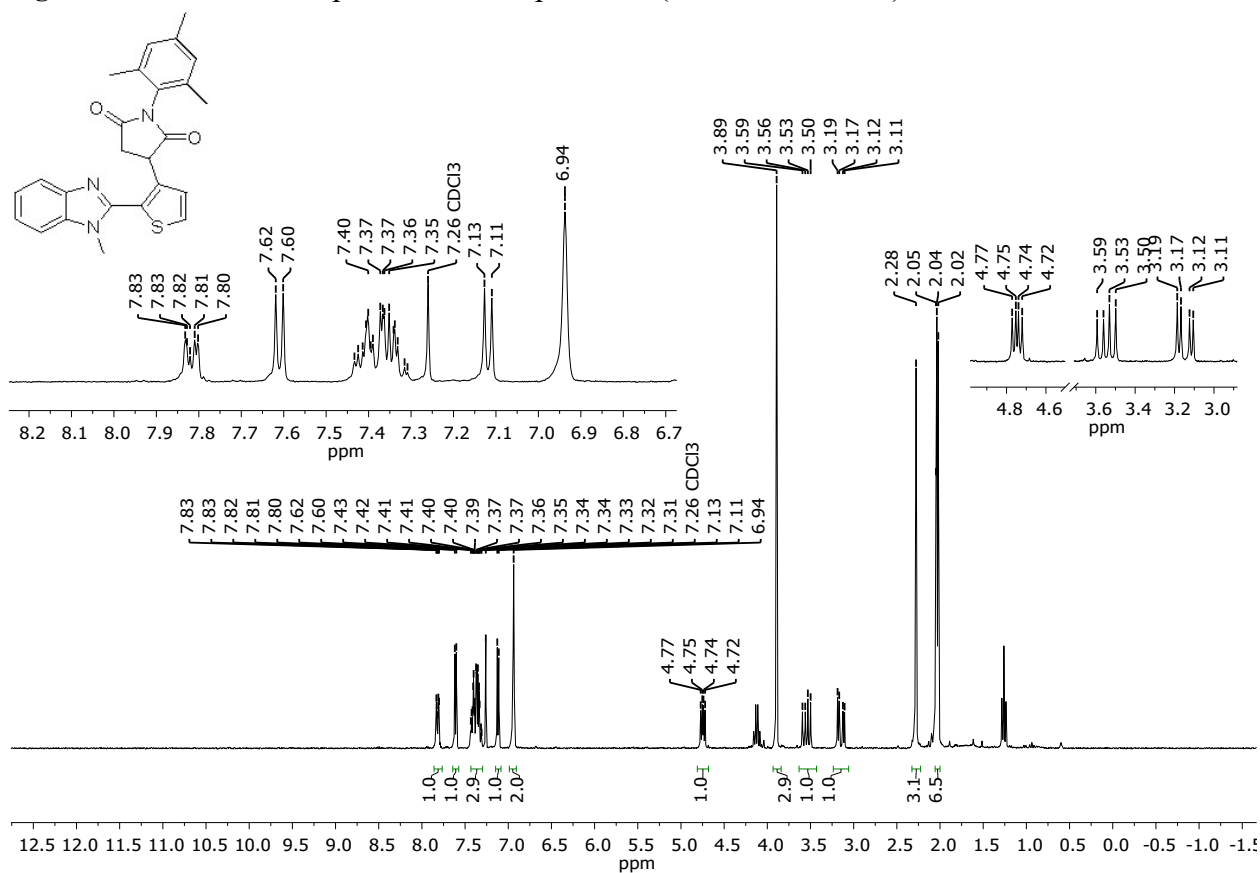

**Figure S16.** <sup>13</sup>C NMR spectrum of compound **3f** (75 MHz, CDCl<sub>3</sub>).

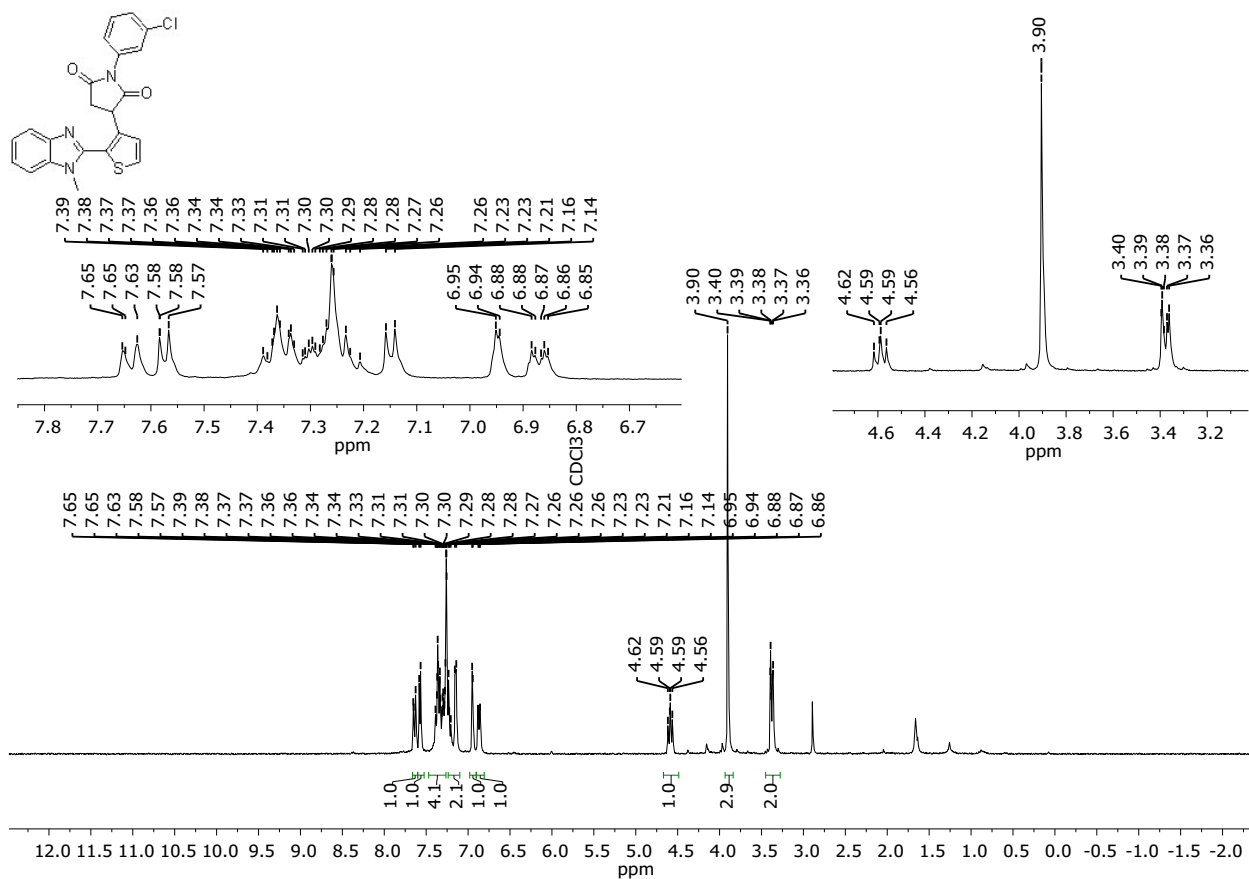

**Figure S17.**  $^1\text{H}$  NMR spectrum of compound **3g** (300 MHz,  $\text{CDCl}_3$ ).

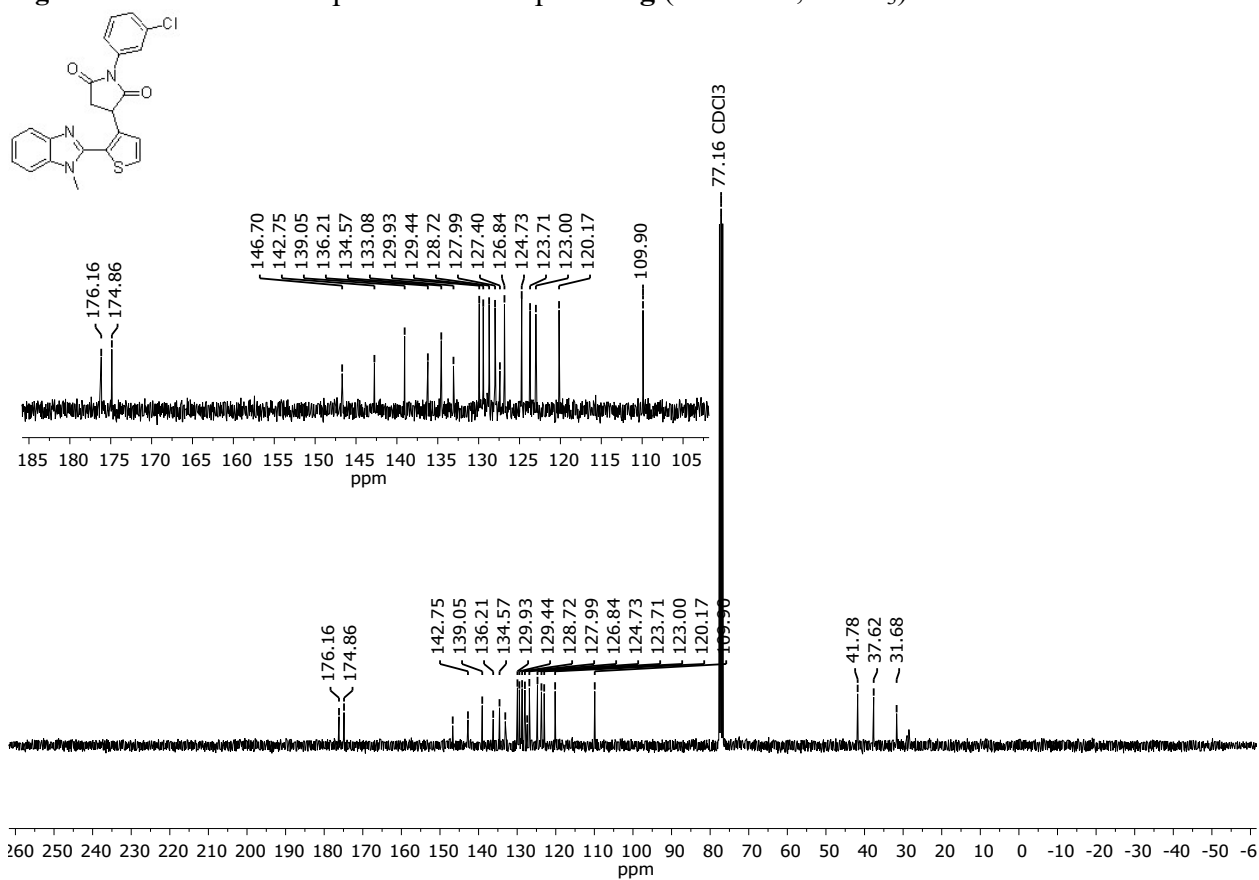

**Figure S18.**  $^{13}\text{C}$  NMR spectrum of compound **3g** (75 MHz,  $\text{CDCl}_3$ ).

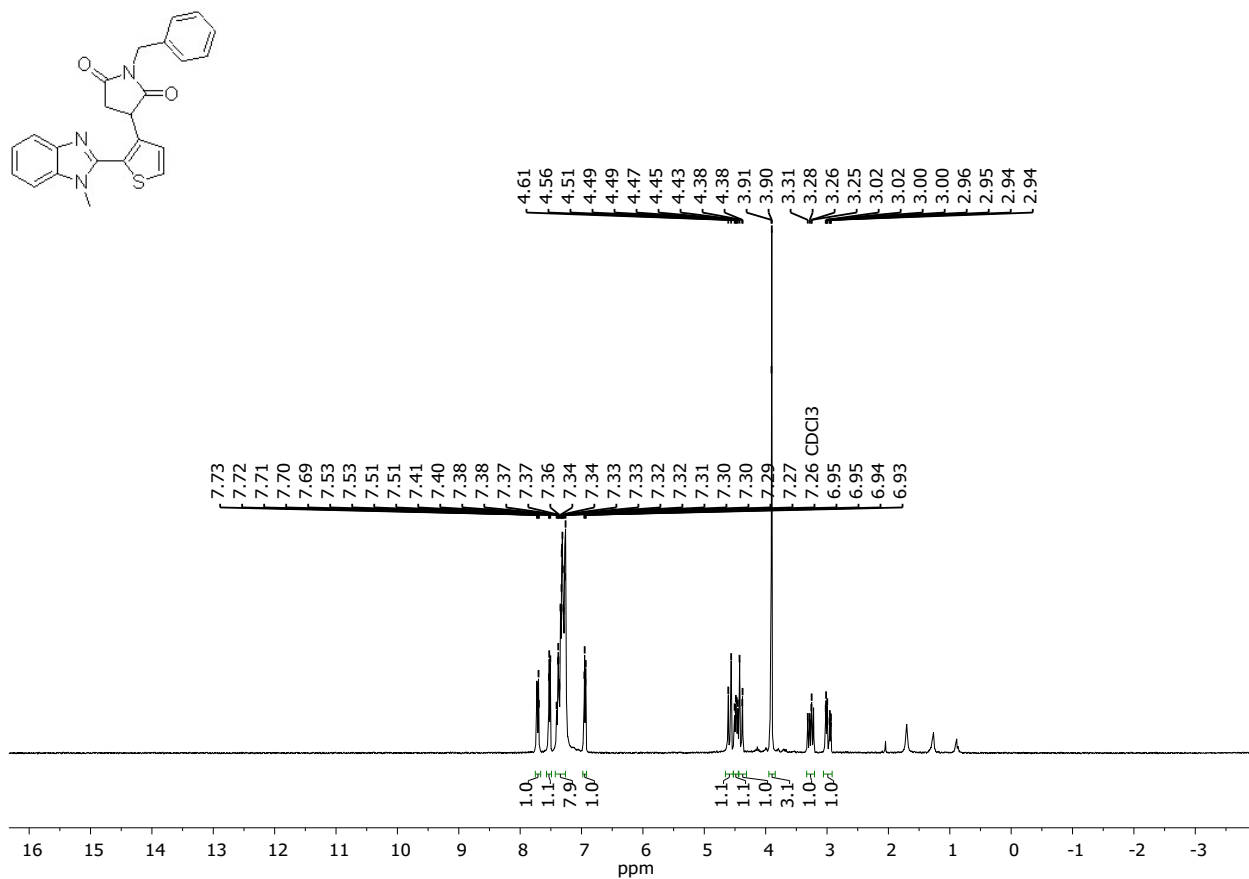

**Figure S19.** <sup>1</sup>H NMR spectrum of compound **3h** (300 MHz, CDCl<sub>3</sub>).

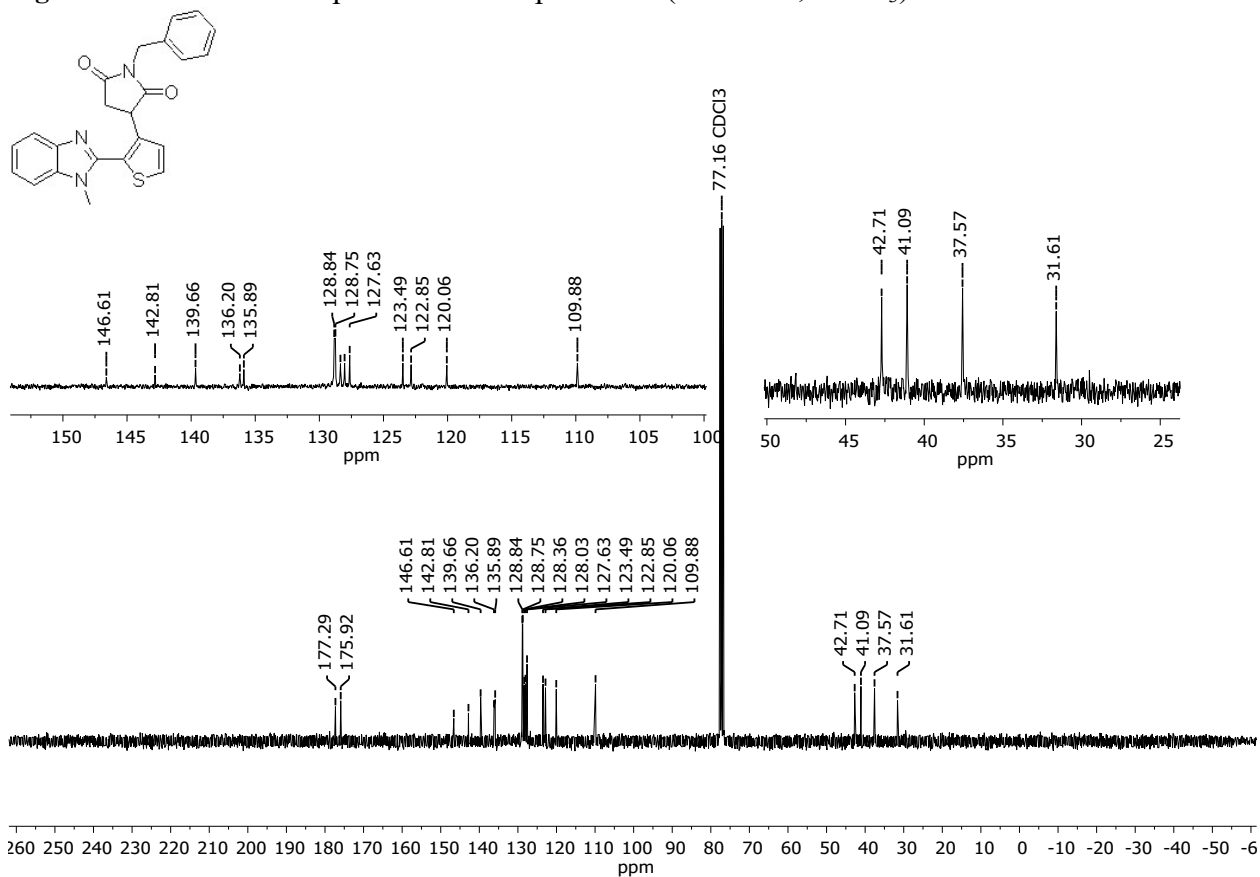

**Figure S20.** <sup>13</sup>C NMR spectrum of compound **3h** (75 MHz, CDCl<sub>3</sub>).

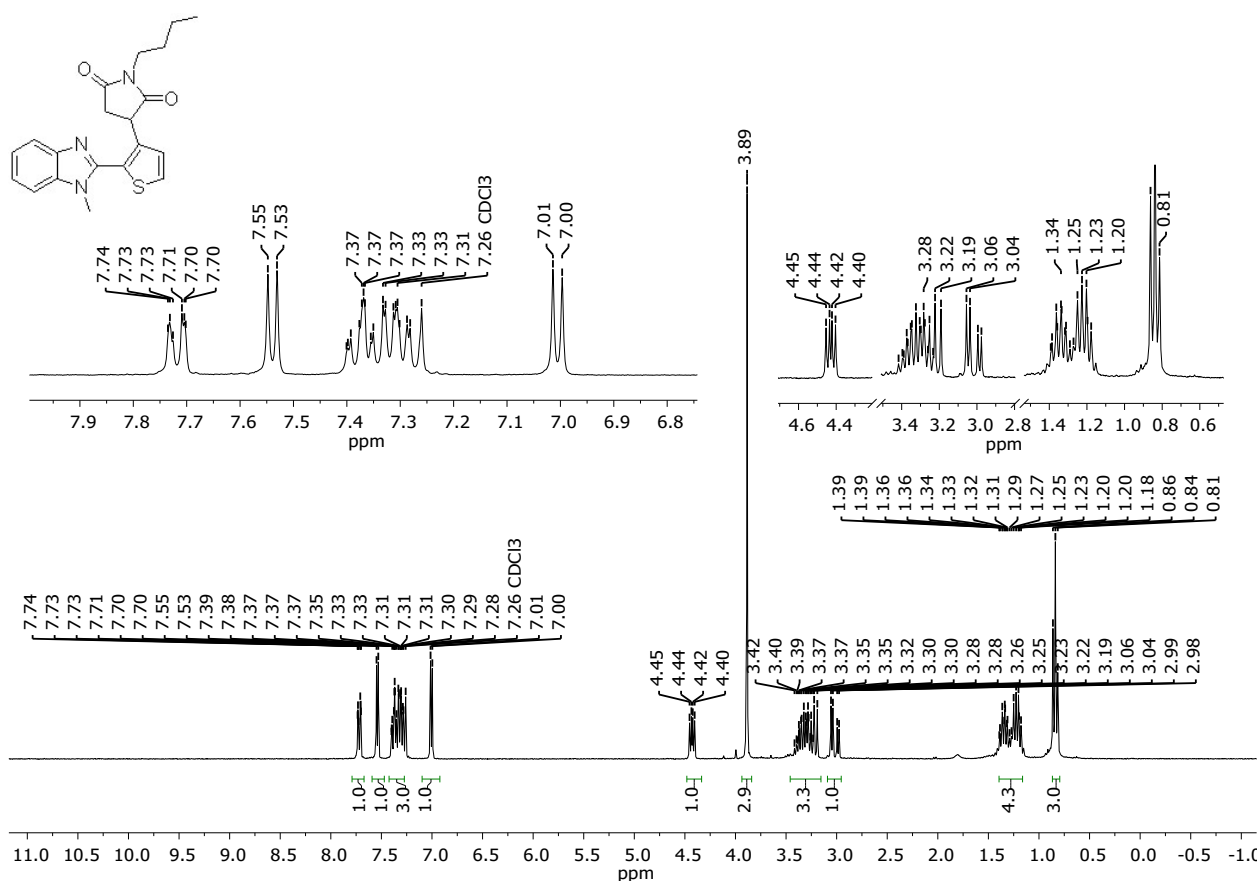

**Figure S21.** <sup>1</sup>H NMR spectrum of compound **3i** (300 MHz, CDCl<sub>3</sub>).

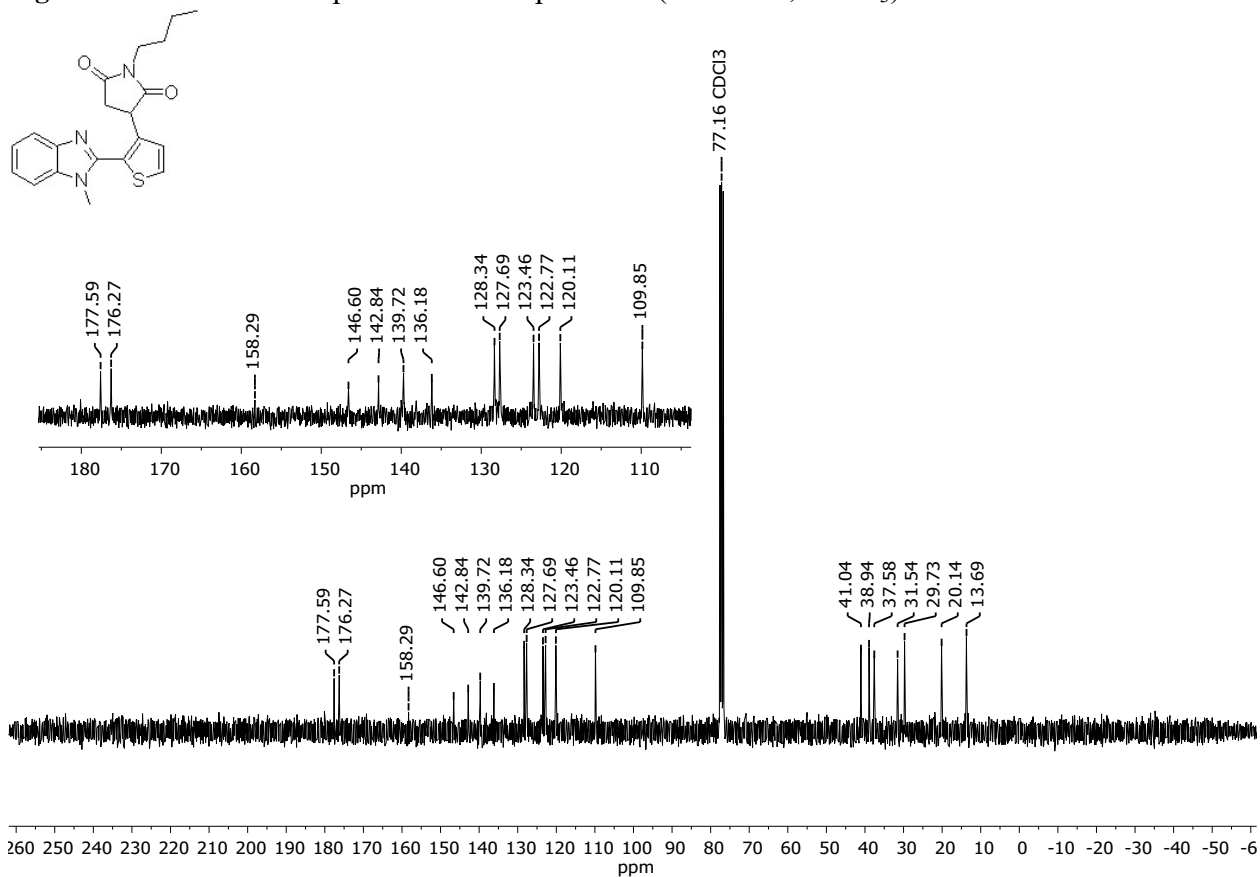

**Figure S22.** <sup>13</sup>C NMR spectrum of compound **3i** (75 MHz, CDCl<sub>3</sub>).

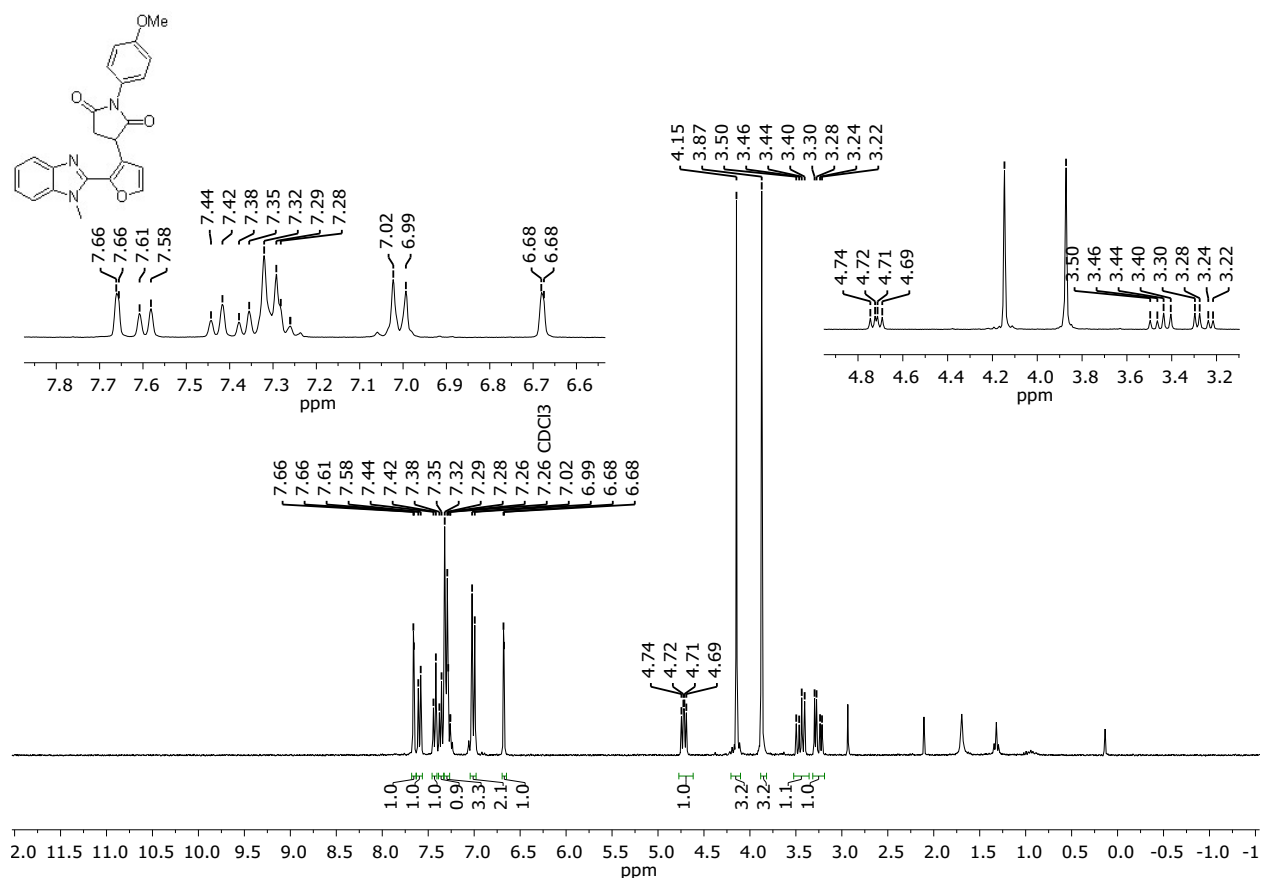

**Figure S23.** <sup>1</sup>H NMR spectrum of compound **3j** (300 MHz, CDCl<sub>3</sub>).

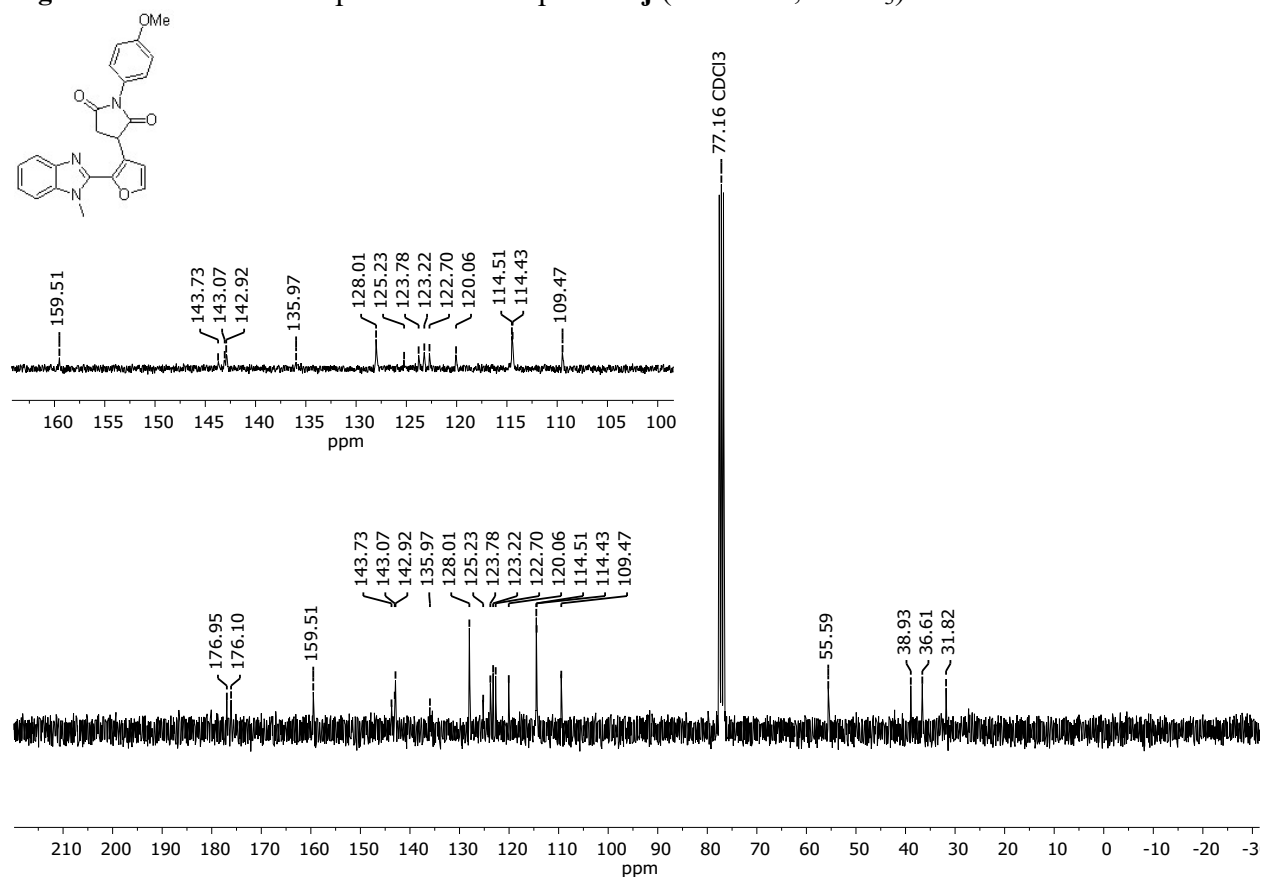

**Figure S24.** <sup>13</sup>C NMR spectrum of compound **3j** (75 MHz, CDCl<sub>3</sub>).

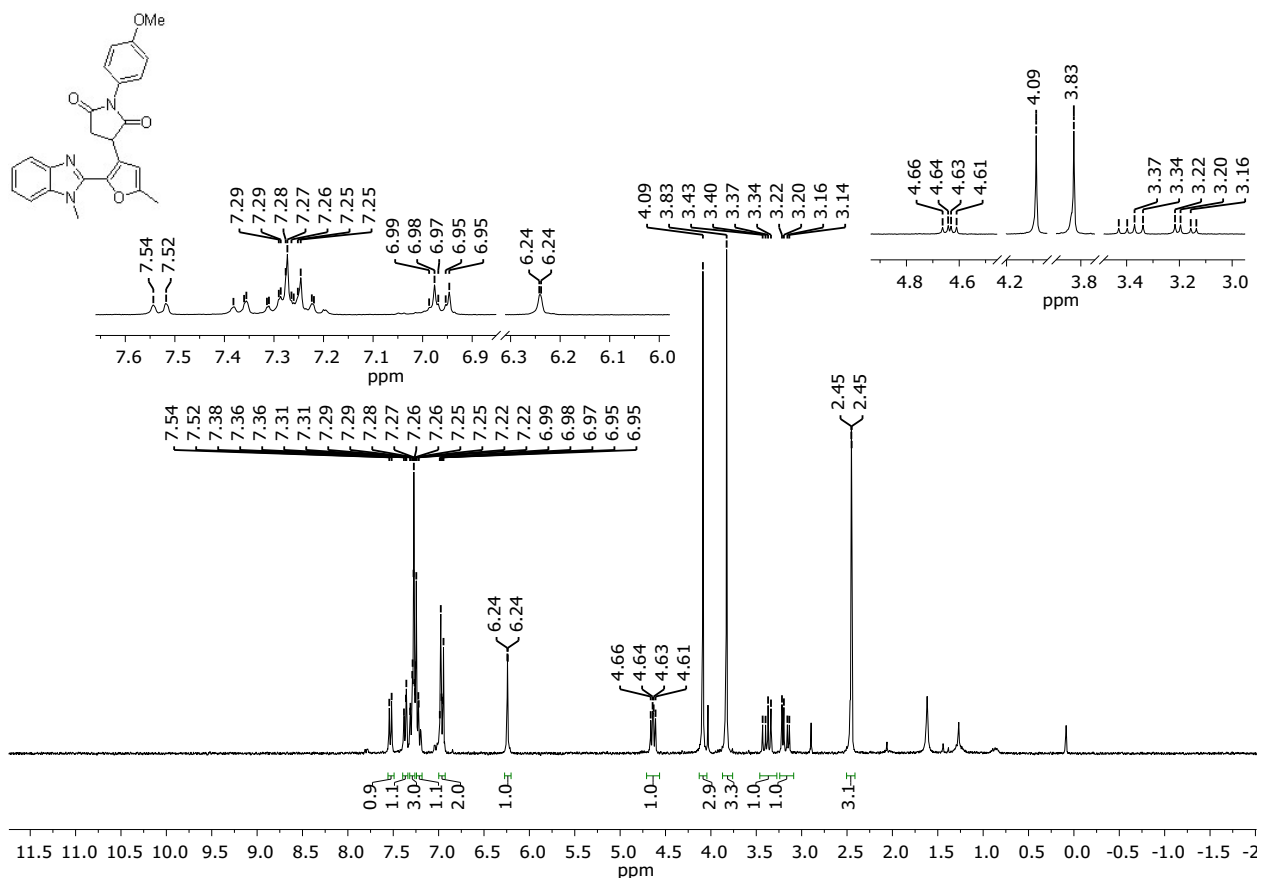

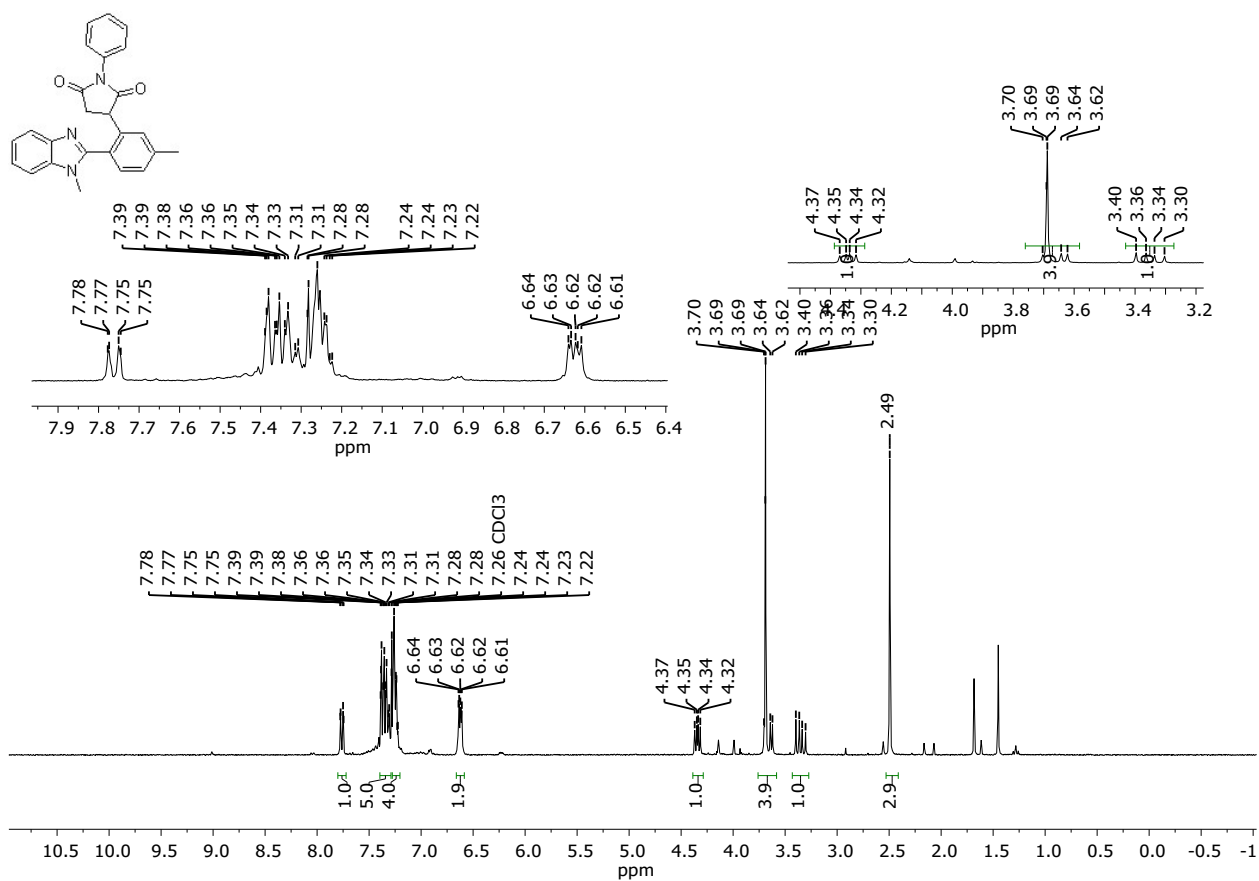

**Figure S27.** <sup>1</sup>H NMR spectrum of compound **31** (300 MHz, CDCl<sub>3</sub>).

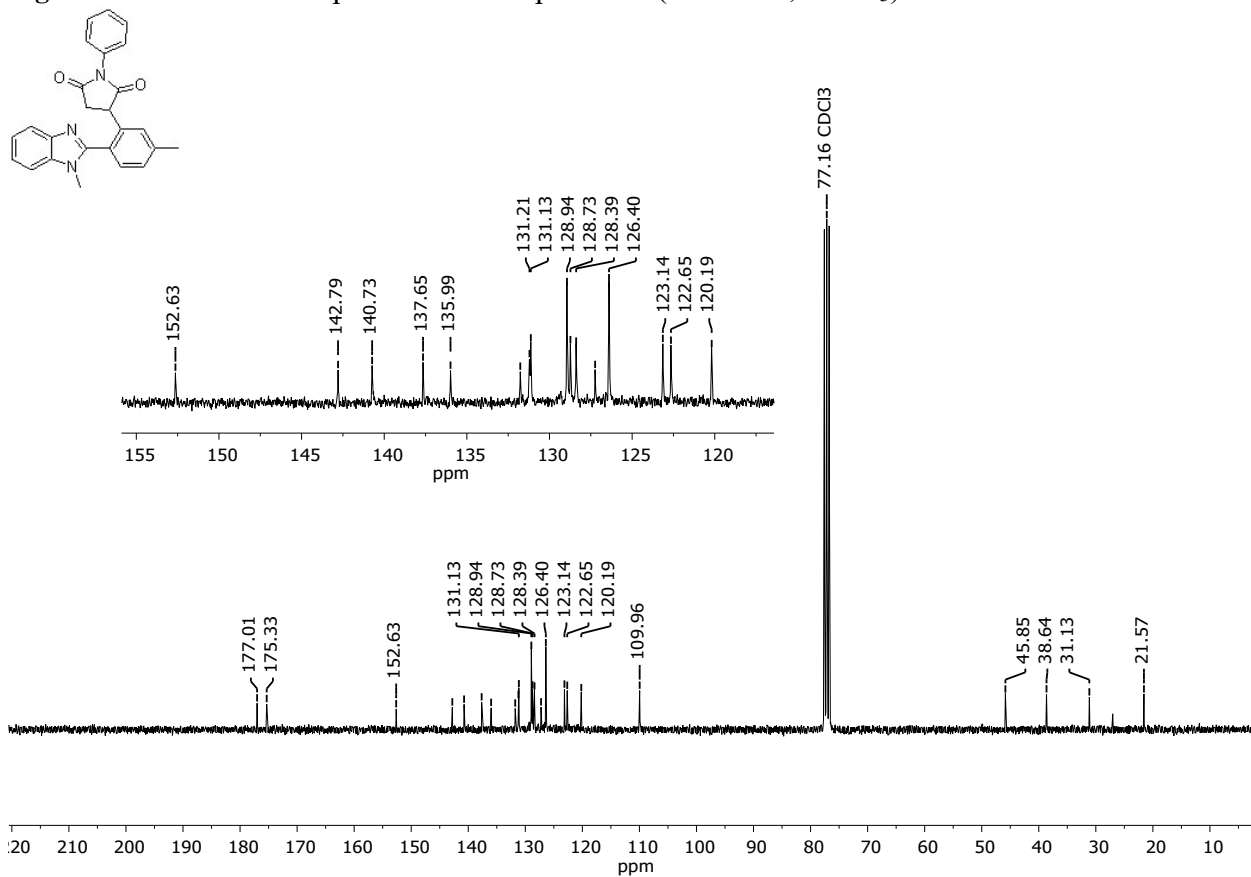

**Figure S28.** <sup>13</sup>C NMR spectrum of compound **31** (75 MHz, CDCl<sub>3</sub>).

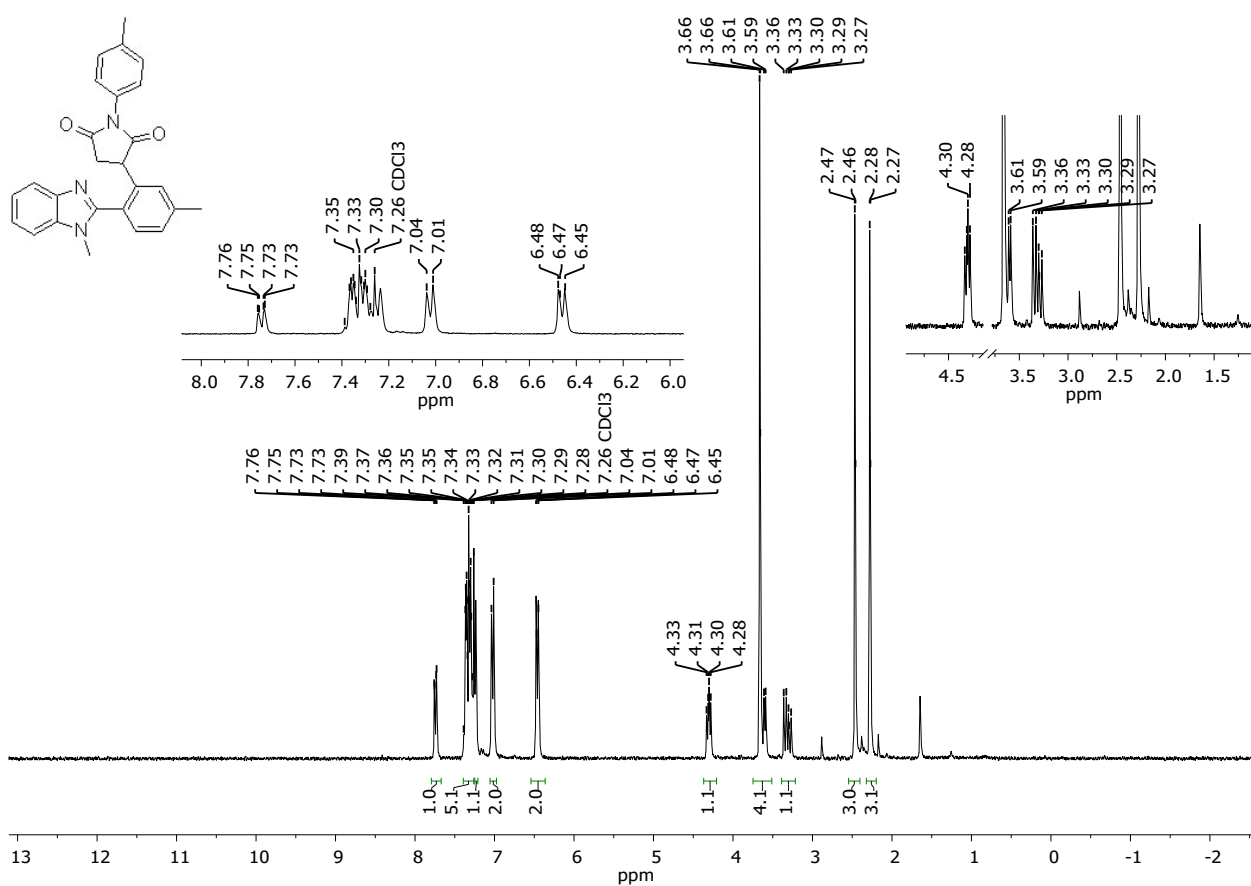

Figure S29. <sup>1</sup>H NMR spectrum of compound **3m** (300 MHz, CDCl<sub>3</sub>).

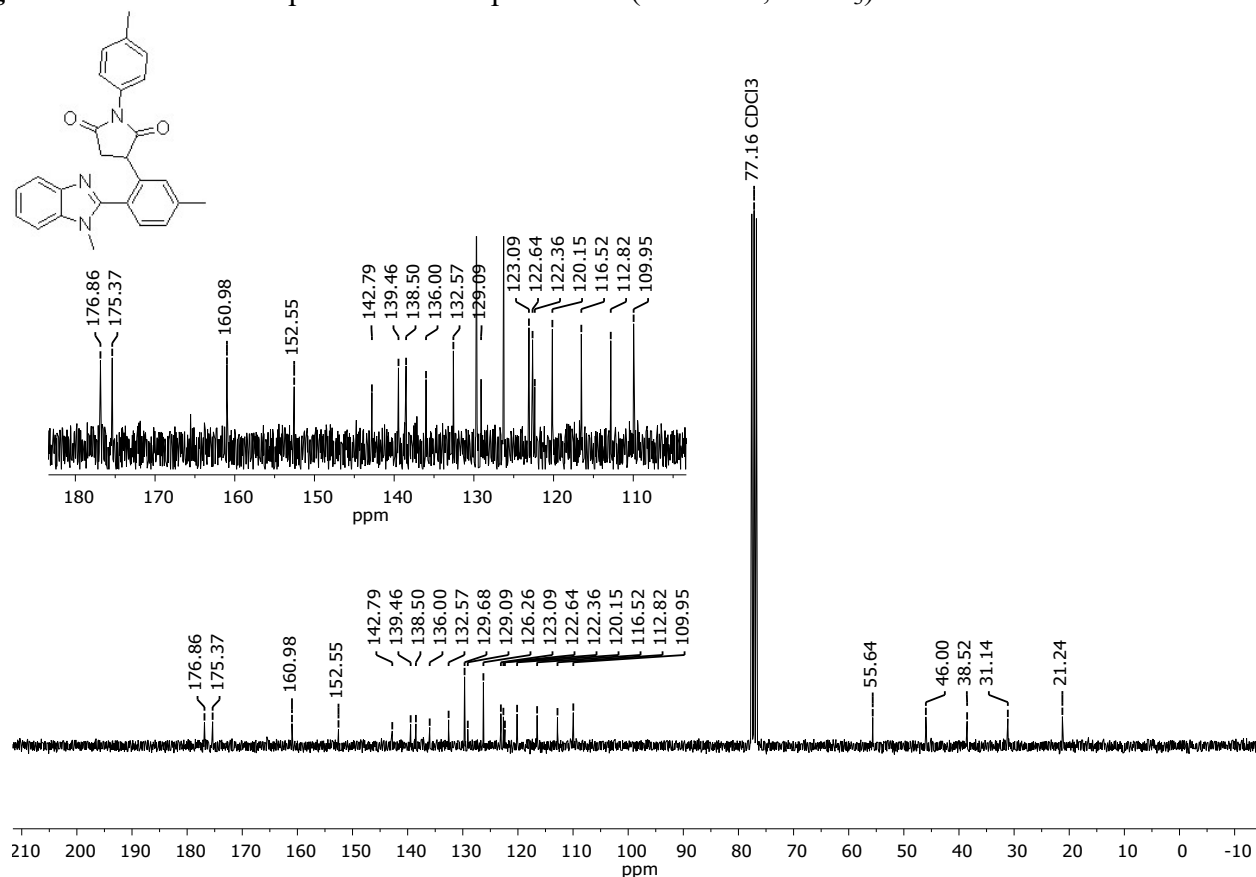

Figure S30. <sup>13</sup>C NMR spectrum of compound **3m** (75 MHz, CDCl<sub>3</sub>).

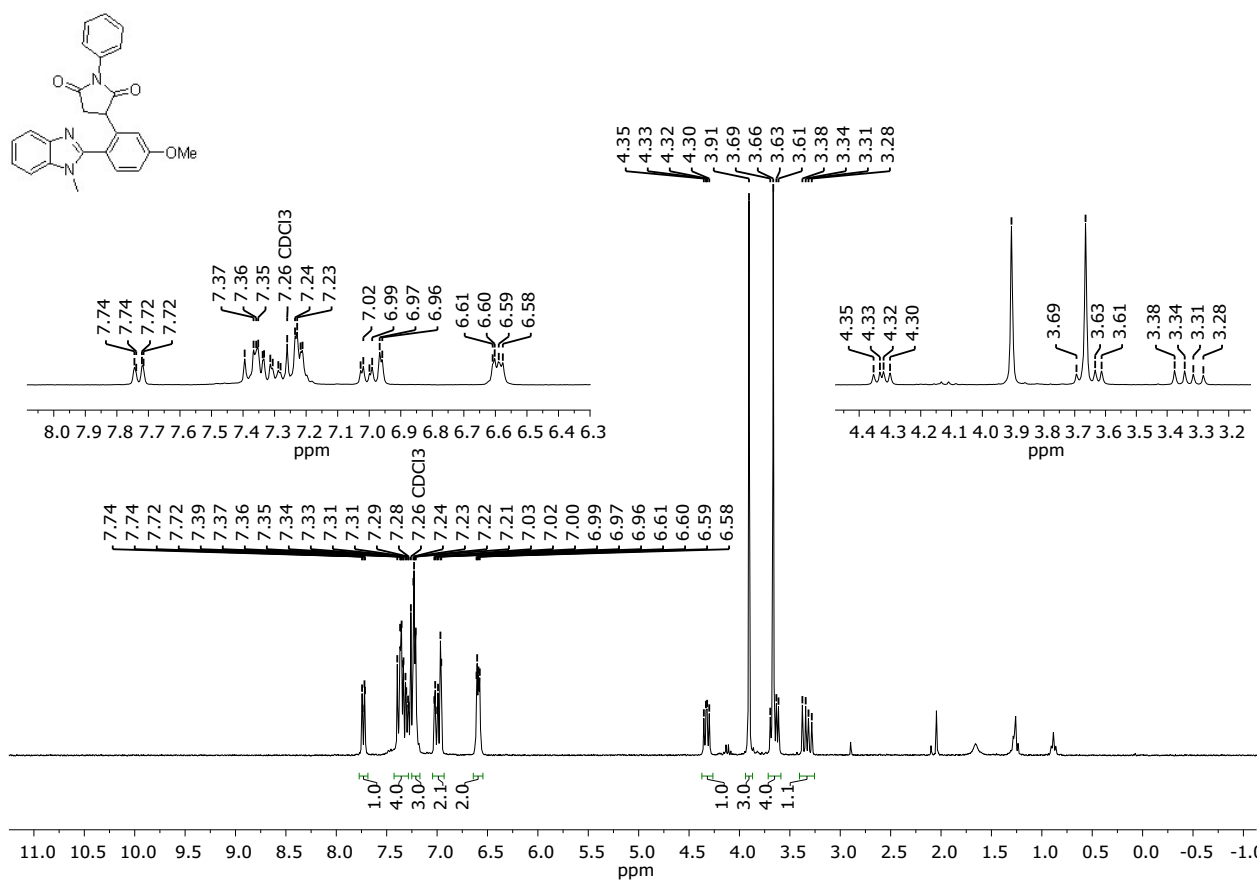

**Figure S31.**  $^1\text{H}$  NMR spectrum of compound **3n** (300 MHz,  $\text{CDCl}_3$ ).

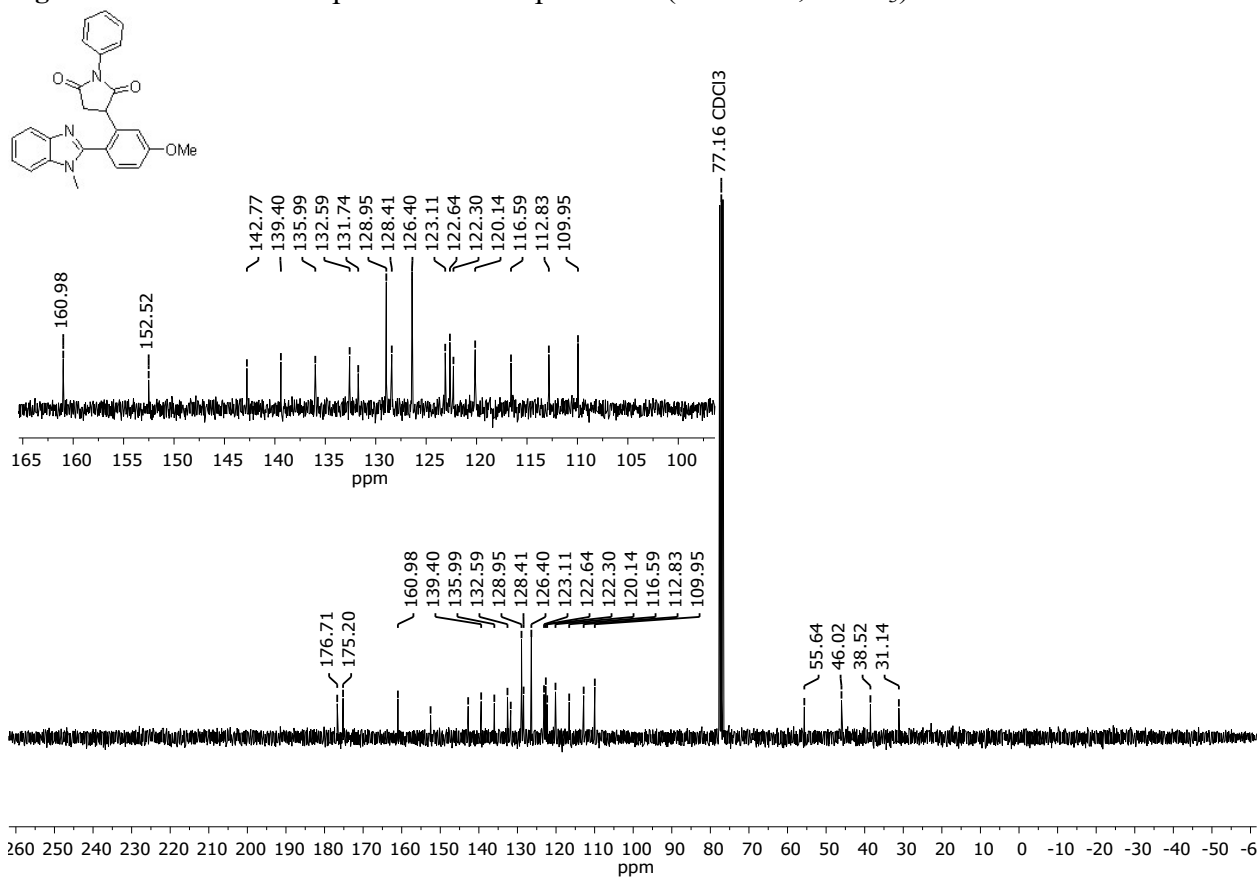

**Figure S32.**  $^{13}\text{C}$  NMR spectrum of compound **3n** (75 MHz,  $\text{CDCl}_3$ ).

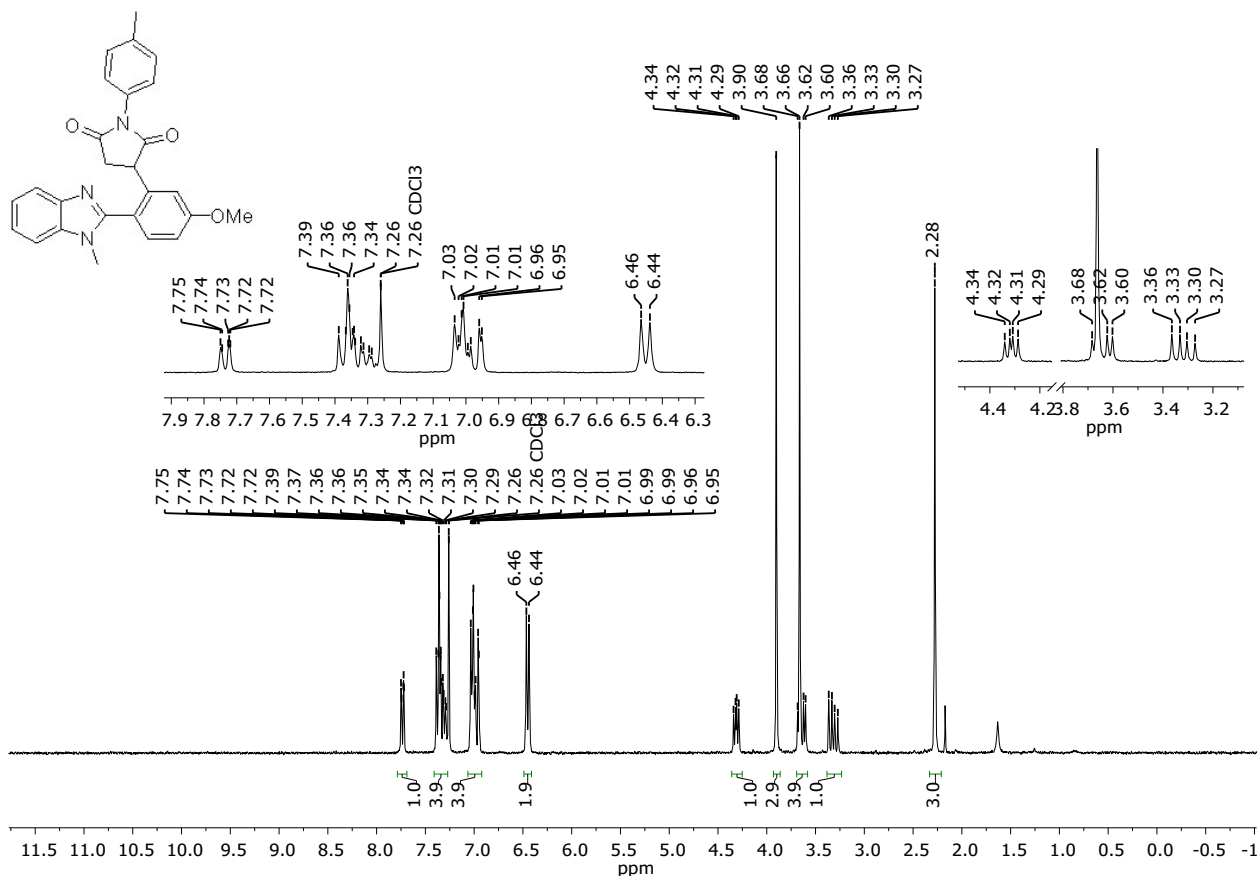

**Figure S33.**  $^1\text{H}$  NMR spectrum of compound **3o** (300 MHz,  $\text{CDCl}_3$ ).

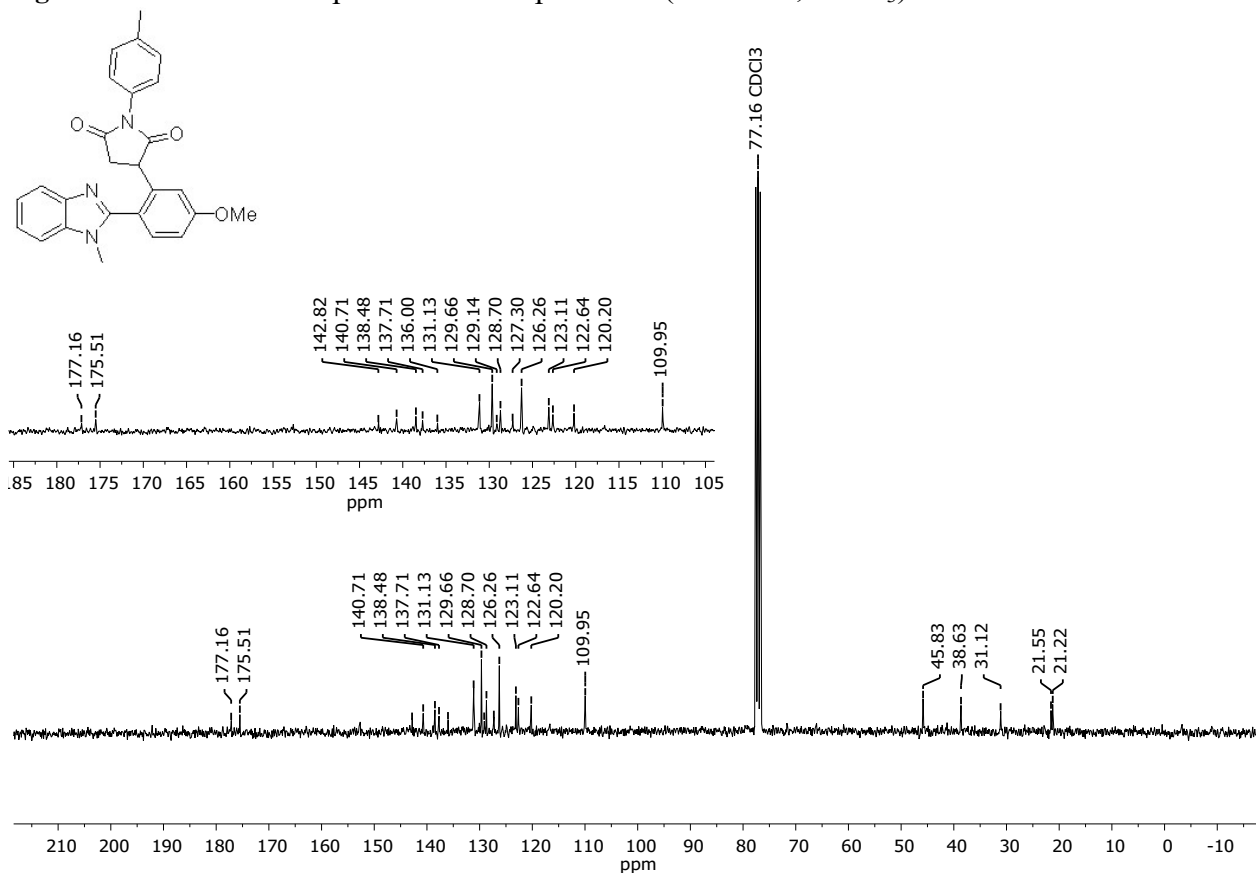

**Figure S34.**  $^{13}\text{C}$  NMR spectrum of compound **3o** (75 MHz,  $\text{CDCl}_3$ ).

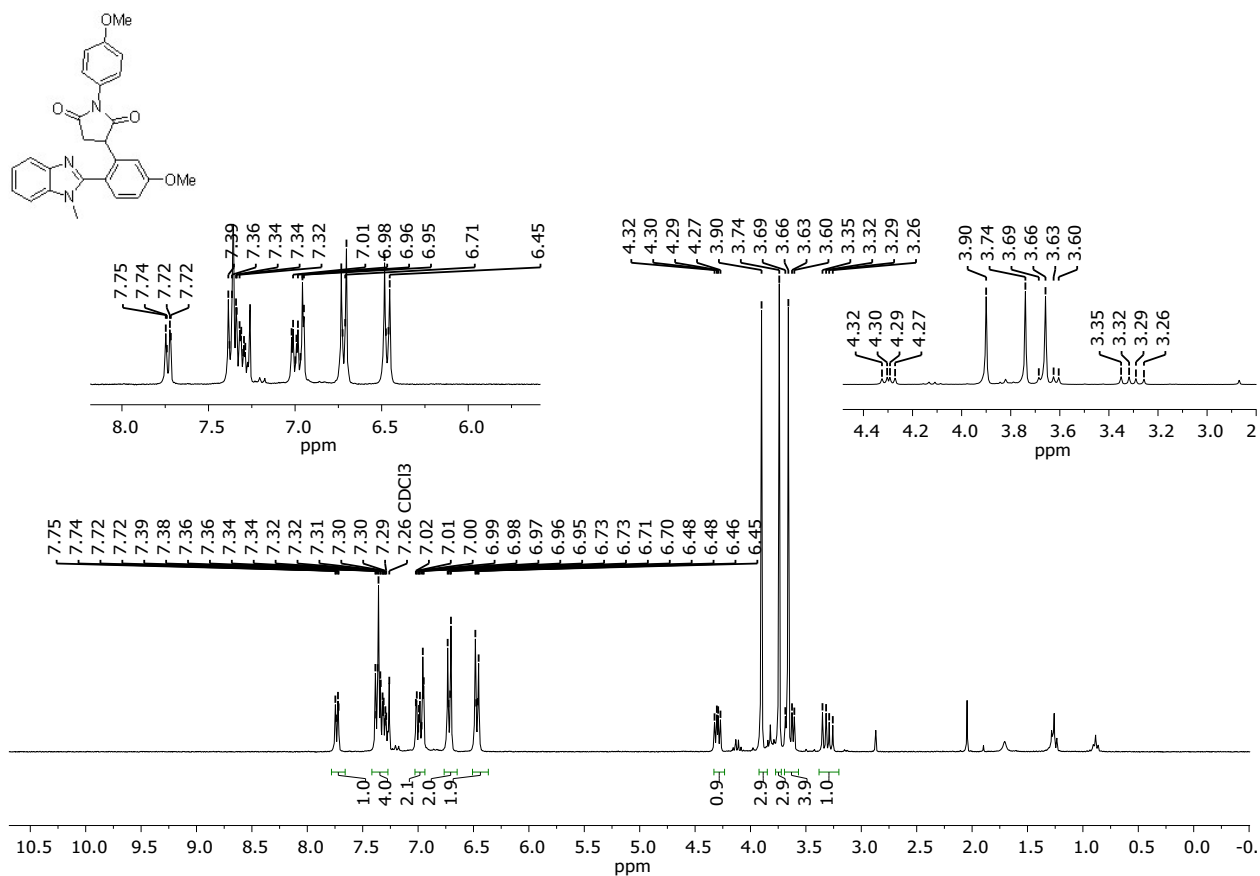

**Figure S35.**  $^1\text{H}$  NMR spectrum of compound **3p** (300 MHz,  $\text{CDCl}_3$ ).

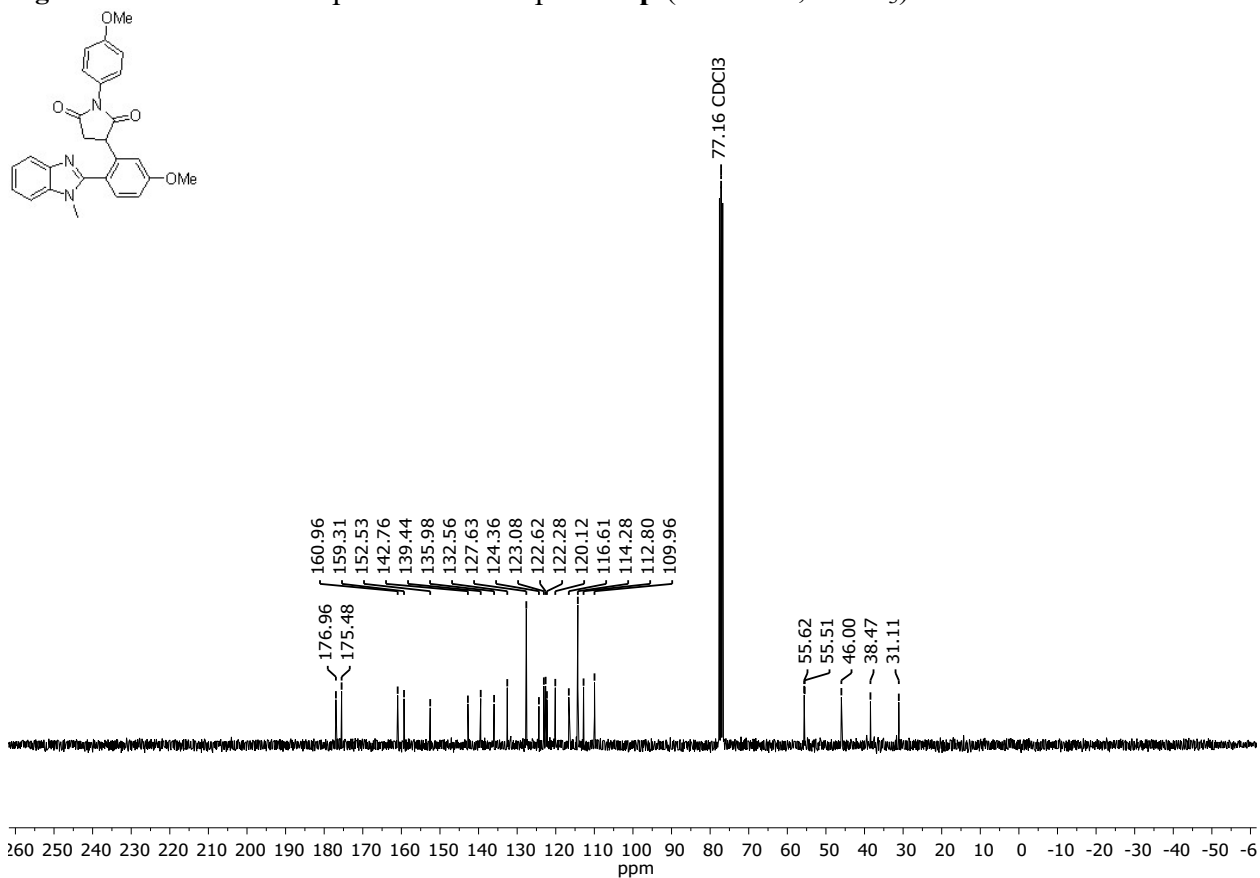

**Figure S36.**  $^{13}\text{C}$  NMR spectrum of compound **3p** (75 MHz,  $\text{CDCl}_3$ ).

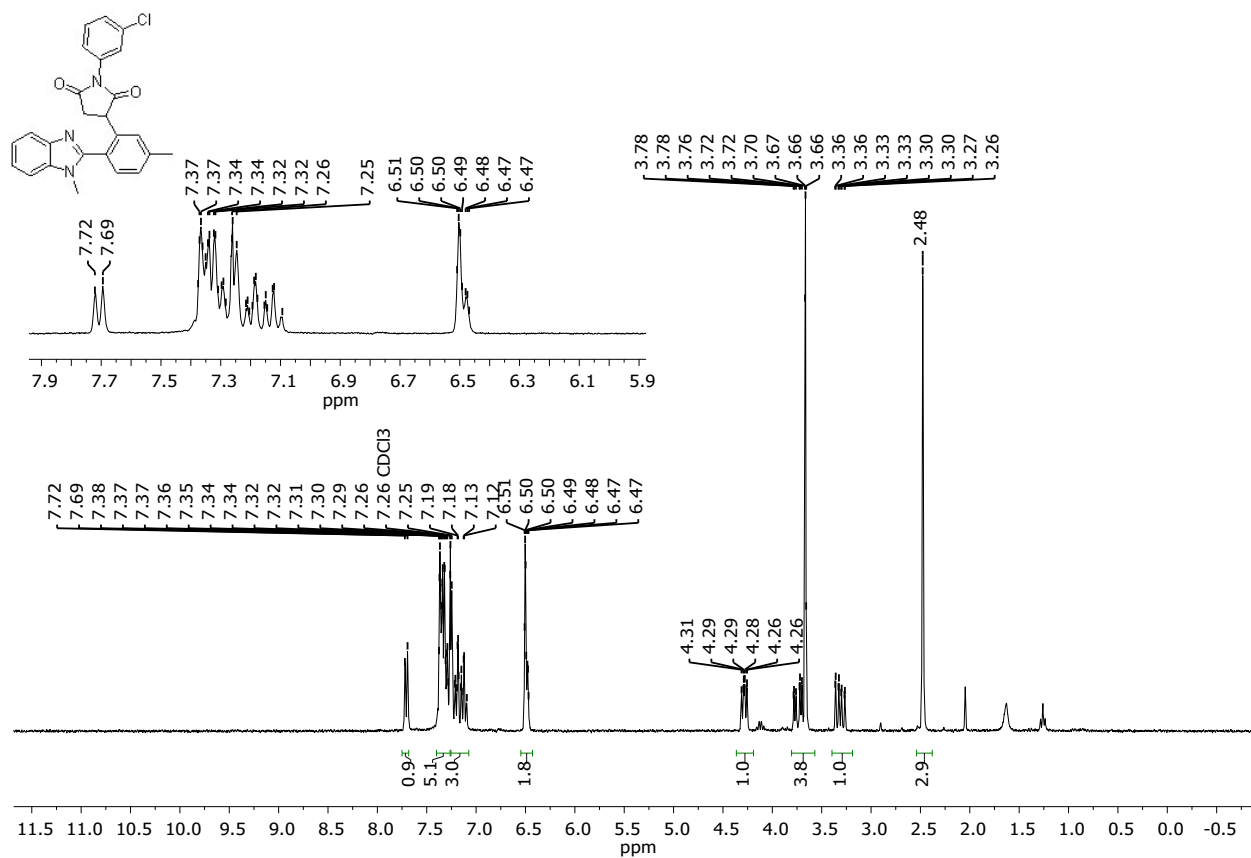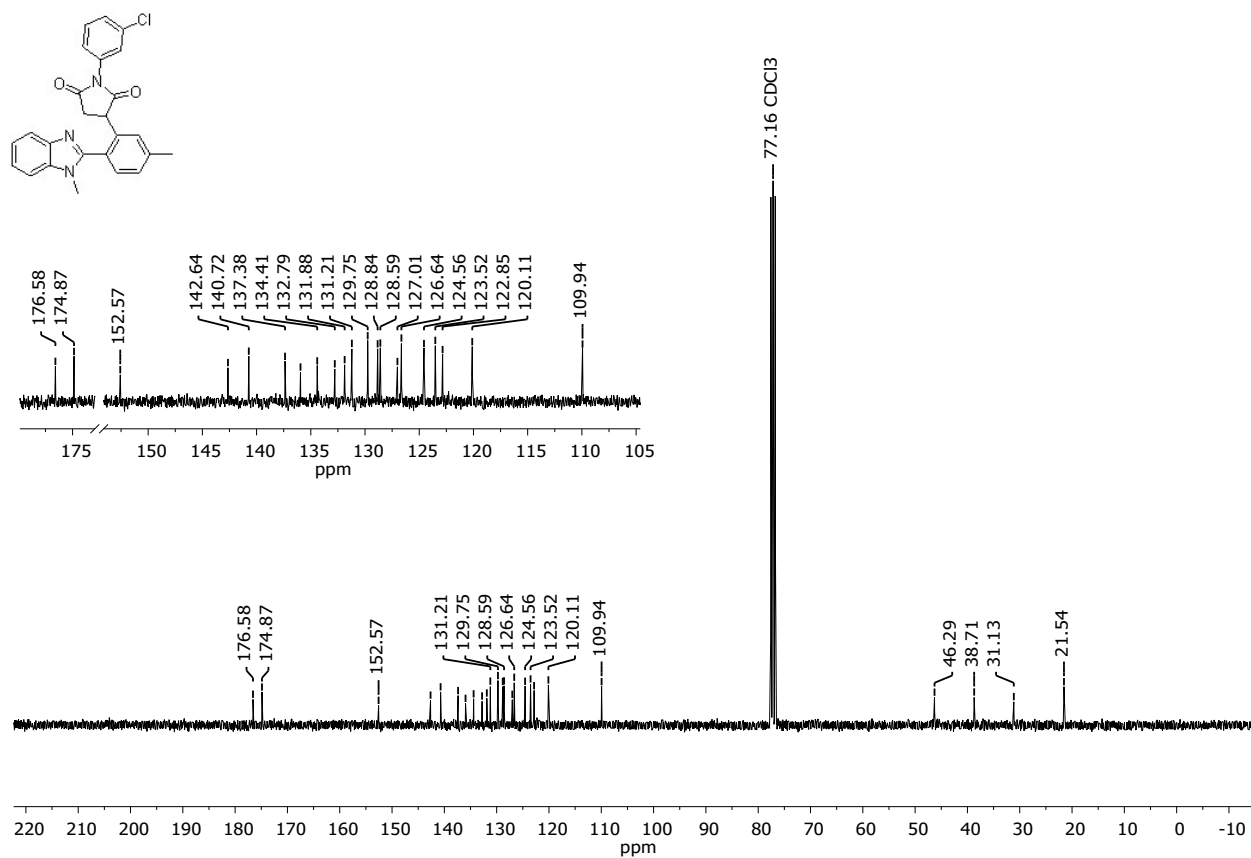

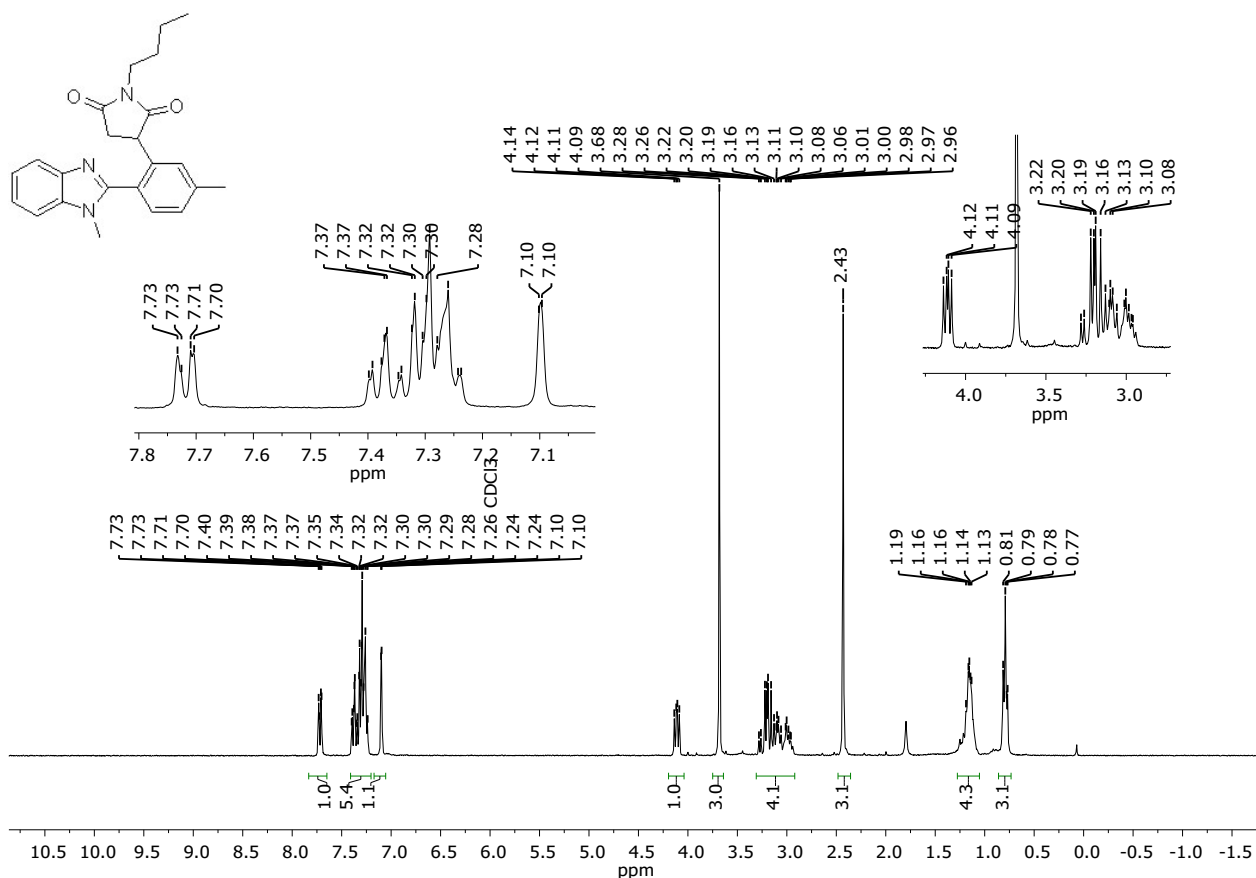

**Figure S39.** <sup>1</sup>H NMR spectrum of compound **3r** (300 MHz, CDCl<sub>3</sub>).

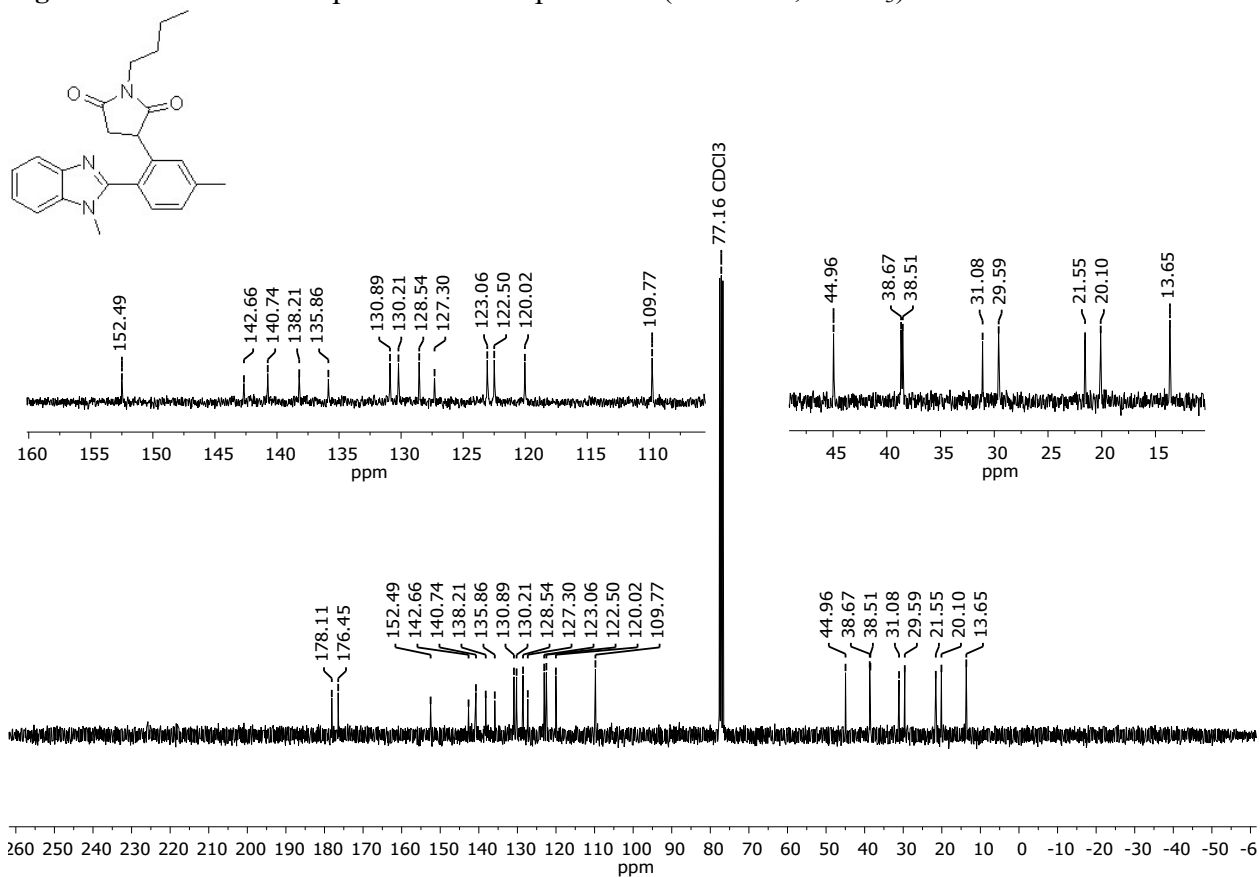

**Figure S40.** <sup>13</sup>C NMR spectrum of compound **3r** (75 MHz, CDCl<sub>3</sub>).

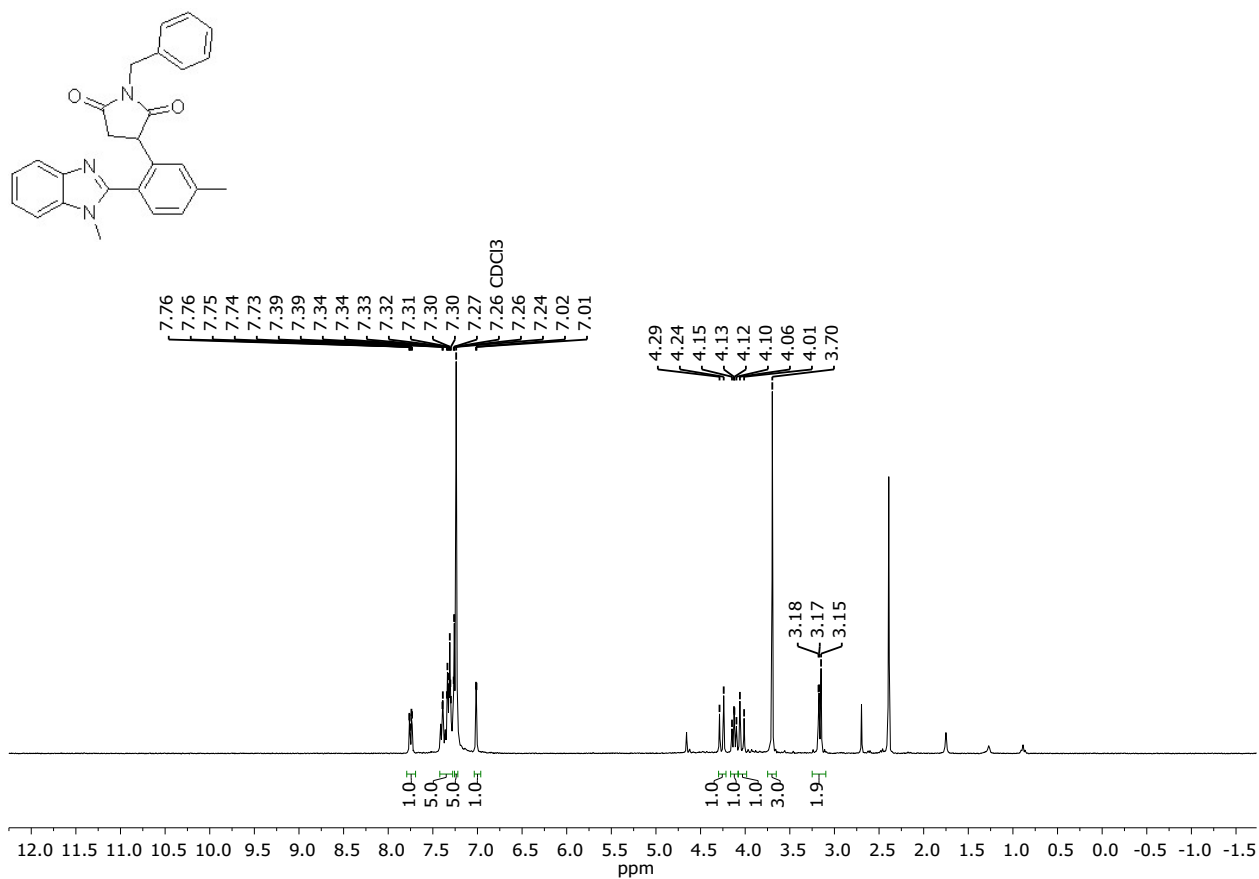

**Figure S41.**  $^1\text{H}$  NMR spectrum of compound **3s** (300 MHz,  $\text{CDCl}_3$ ).

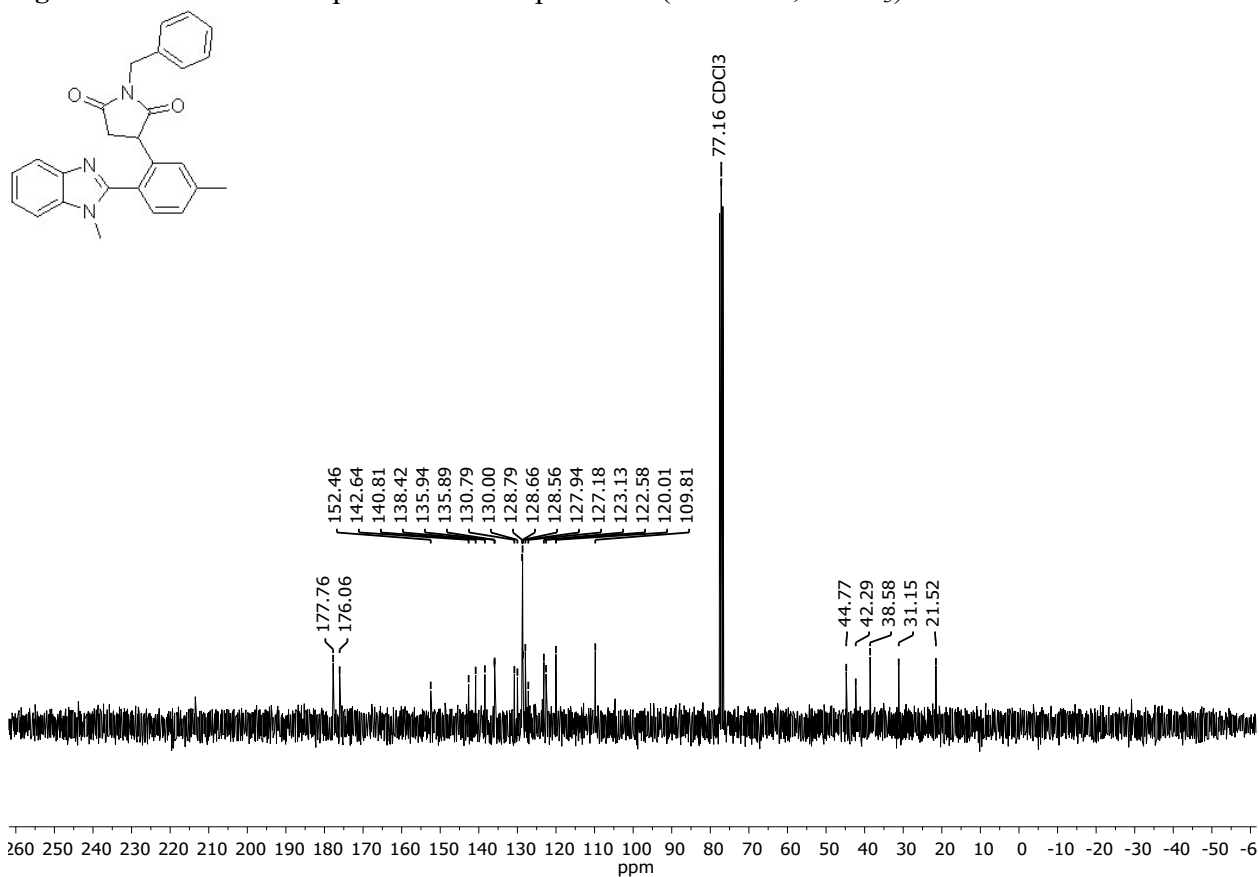

**Figure S42.**  $^{13}\text{C}$  NMR spectrum of compound **3s** (75 MHz,  $\text{CDCl}_3$ ).

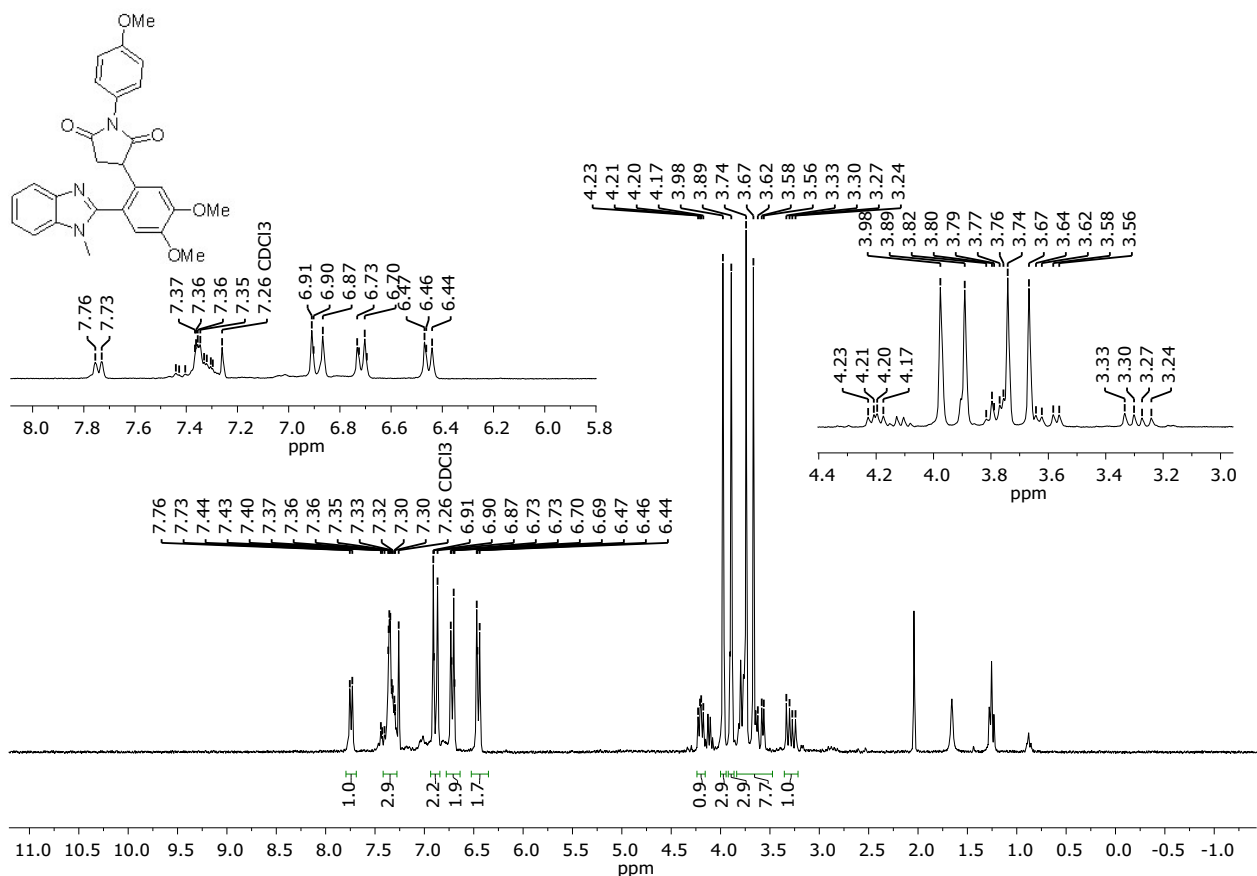

Figure S43. <sup>1</sup>H NMR spectrum of compound **3t** (300 MHz, CDCl<sub>3</sub>).

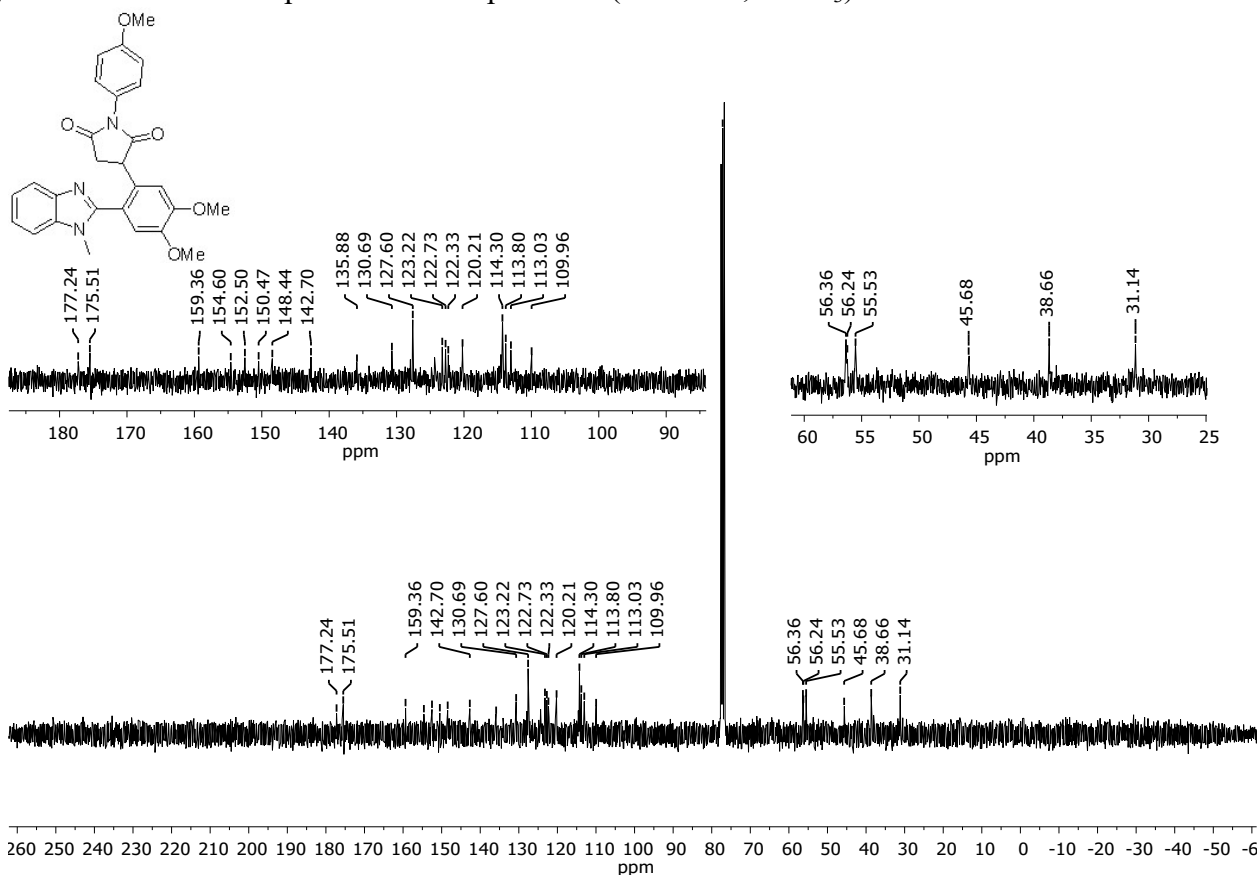

Figure S44. <sup>13</sup>C NMR spectrum of compound **3t** (75 MHz, CDCl<sub>3</sub>).

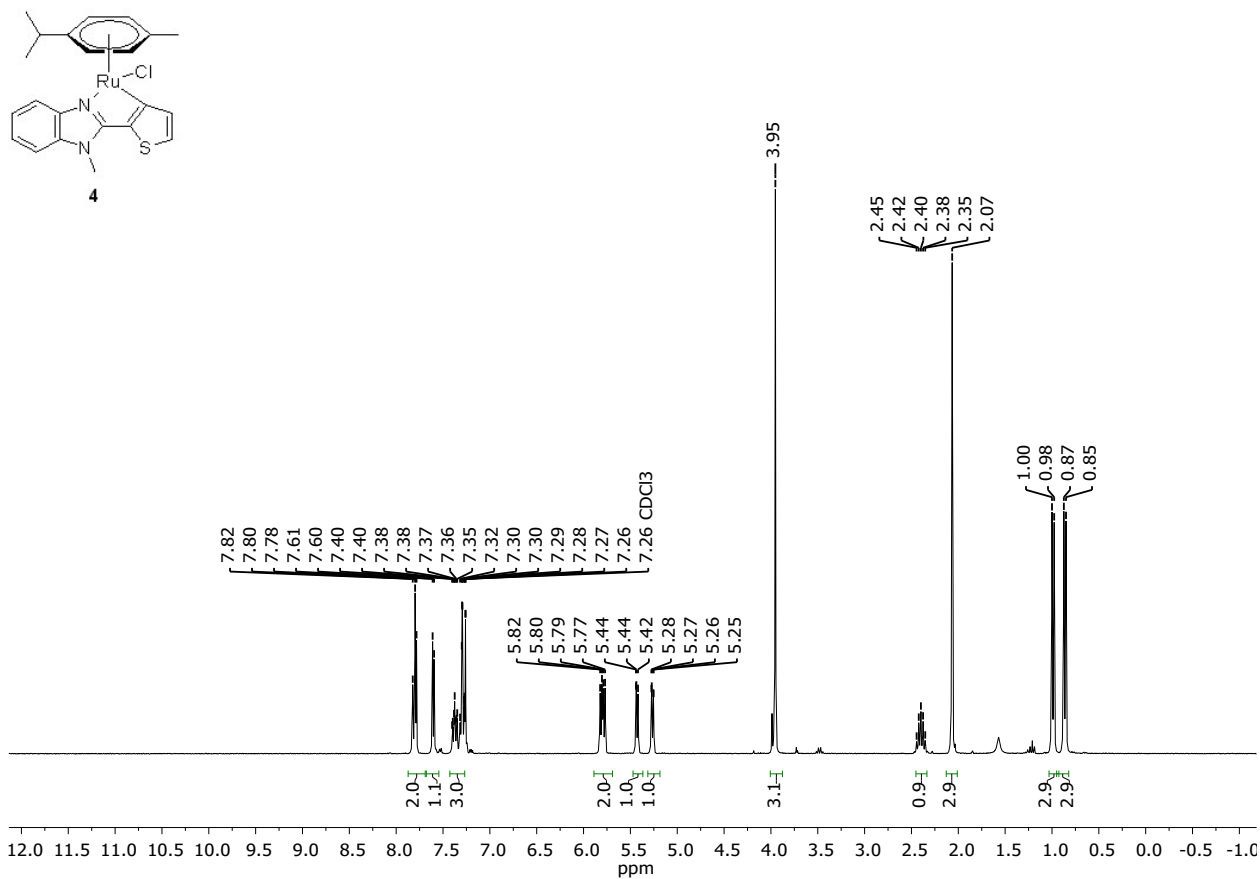

**Figure S45.**  $^1\text{H}$  NMR spectrum of compound **4** (300 MHz,  $\text{CDCl}_3$ ).

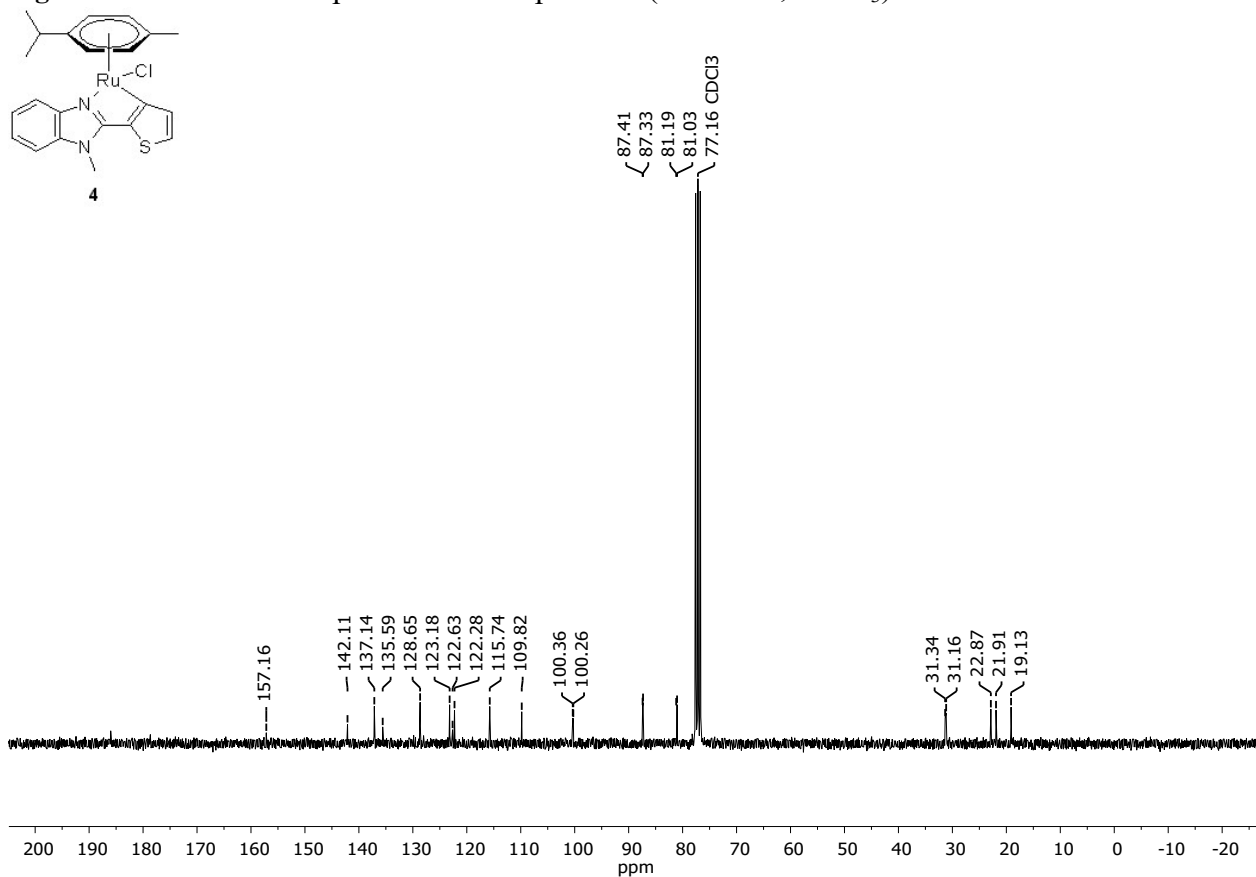

**Figure S46.**  $^{13}\text{C}$  NMR spectrum of compound **4** (75 MHz,  $\text{CDCl}_3$ ).

### Supplementary references

- S1 V. Novohradsky, A. Marco, L. Markova, N. Cutillas, J. Ruiz and V. Brabec, *Eur. J. Med. Chem.*, 2023, **66**, 9766.
- S2 S. A. I. Quadri, T. C. Das and M. Farooqui, *ChemistrySelect*, 2017, **2**, 1802.
- S3 M. M. El'chaninov, A. M. Simonov, V. P. Kosenko and L. Y. Oleinikova, *Chemistry of Heterocyclic Compounds*, 1981, **17**, 378.
- S4 Z. Tang, S. Mai, Y. Zhou and Q. Song, *Org. Chem. Front.*, 2018, **5**, 2583.
- S5 L.-L. Zhao, W. Liu, Z. Zhang, H. Zhao, Q. Wang and X. Yan, *Organic Letters*, 2019, **21**, 10023.
- S6 Y. T. Duan, T. H. Parmar, C. B. Sangani, A. S. Shah and R. K. Ameta, *Russian Journal of Organic Chemistry*, 2020, **56**, 856.
- S7 CrysAlisPro. Version 1.171.43. *Rigaku Oxford Diffraction*, **2023**.
- S8 Sheldrick, G. M. SHELXT - Integrated space-group and crystal-structure determination. *Acta Cryst.* **2015**, A71(1), 3-8. <http://doi.org/10.1107/S2053273314026370>
- S9 Sheldrick, G. M. Crystal structure refinement with SHELXL. *Acta Cryst.* **2015**, C71(1), 3-8. <http://doi.org/10.1107/S2053229614024218>
- S10 Dolomanov O.V.; Bourhis L.J.; Gildea R.J.; Howard J.A.K.; Puschmann H. OLEX2: a complete structure solution, refinement and analysis program. *J. Appl. Cryst.* **2009**, 42(2), 339-341. <http://doi.org/10.1107/S0021889808042726>
- S11 K. E. Shepelenko, I. G. Gnatiuk, A. A. Aleksandrov, M. E. Minyaev, V. M. Chernyshev and V. P. Ananikov, *Org. Chem. Front.*, 2025, 10.1039/D5QO00965K.
